# Supplementary material for: Local CpG density affects the trajectory and variance of age-associated DNA methylation changes
Source: Genome Biol. 2022 Oct 17;23:216. doi: 10.1186/s13059-022-02787-8 (PMC9575273; doi:10.1186/s13059-022-02787-8)
Supplement: Supplementary file 2 — Additional file 2: Supplementary tables Table S1-7. [file 13059_2022_2787_MOESM2_ESM.xlsx]

## Sheet: Table S1
Table S1 - list of rapid gain CpGs
Illumina CpG IDs for rapid gain CpGs
cg18008086
cg10818896
cg01293346
cg01896579
cg24455383
cg23429735
cg25977504
cg02951062
cg17319011
cg23957912
cg23208326
cg26888227
cg18884271
cg10488199
cg24132989
cg18276235
cg09985739
cg13375690
cg14575983
cg05558937
cg03099832
cg20074159
cg00408720
cg04250181
cg01736133
cg03737629
cg10012711
cg02387745
cg15312323
cg01074676
cg22061809
cg18690833
cg09562980
cg04245630
cg21321768
cg09372808
cg00321614
cg16461692
cg17974460
cg13928102
cg08721746
cg18125090
cg22706992
cg14009504
cg23921367
cg03585795
cg15911114
cg18160841
cg11221687
cg10648815
cg02480970
cg20732286
cg03508346
cg01903440
cg26961824
cg12617598
cg01614536
cg05409419
cg06517521
cg22534759
cg23051372
cg03420245
cg11175091
cg18198301
cg01810623
cg11460562
cg22009239
cg19217820
cg17536287
cg06579481
cg07969095
cg12995372
cg05776336
cg00395486
cg15110800
cg00299070
cg12378939
cg17824939
cg05295594
cg00874877
cg27280279
cg06204629
cg13460439
cg06855506
cg07714266
cg10951117
cg18412984
cg20288016
cg08604181
cg09636727
cg07776166
cg06484127
cg18770029
cg21018647
cg20127207
cg00282877
cg16328548
cg04395462
cg05954825
cg23049758
cg01719390
cg13264800
cg16577567
cg01757255
cg07124680
cg22186380
cg09886849
cg11296782
cg16833110
cg07035454
cg03241046
cg04511182
cg25107282
cg20573989
cg17327268
cg19048331
cg26839652
cg15240320
cg05697394
cg06093993
cg17944003
cg23254737
cg23050705
cg07192243
cg13728039
cg13472369
cg14110969
cg14145972
cg19150842
cg01924320
cg17217920
cg15880016
cg00858738
cg08073874
cg10662603
cg11580351
cg05740739
cg18023455
cg24149455
cg17811578
cg11911128
cg00657674
cg18034501
cg02542806
cg24726965
cg09637757
cg10705030
cg20892287
cg19723218
cg23155293
cg17969913
cg25035332
cg03354810
cg13244211
cg20682236
cg15134456
cg22356541
cg27485829
cg14209138
cg25034423
cg15831905
cg04708391
cg17405178
cg06599575
cg27551697
cg07326288
cg21378920
cg13779610
cg15368044
cg04855971
cg06239143
cg24964793
cg25349643
cg12623107
cg25018673
cg01260541
cg21001050
cg20768515
cg25300234
cg22042996
cg21910363
cg09278723
cg22781921
cg10376067
cg15558616
cg25558218
cg07008962
cg08981626
cg14845619
cg11404296
cg00442670
cg19637591
cg24092907
cg25155679
cg03291996
cg06391663
cg07120254
cg09039561
cg17383778
cg19948457
cg04961042
cg20481837
cg12862820
cg01578265
cg06986537
cg13802433
cg02880032
cg06873606
cg20567355
cg15036157
cg10439246
cg15701166
cg16958715
cg08072933
cg21584184
cg20672131
cg12221689
cg24524694
cg13978902
cg25595541
cg01367751
cg24776427
cg24066516
cg11952914
cg19997181
cg20386109
cg09688422
cg16782675
cg02602268
cg02222761
cg23104549
cg22852824
cg00925831
cg23225911
cg20084434
cg02334098
cg12887317
cg00309402
cg13621272
cg07175572
cg05359518
cg25592206
cg27027668
cg24509898
cg21562809
cg13906954
cg21545673
cg15604046
cg18769584
cg19249042
cg24290546
cg21376109
cg14196011
cg24371906
cg21023114
cg10191600
cg14091154
cg12437809
cg05858008
cg04489243
cg13225511
cg22799510
cg18542842
cg13570658
cg12857520
cg08194212
cg18662365
cg10311417
cg02177950
cg18949521
cg20016599
cg13959110
cg20255451
cg26182497
cg19950767
cg07346171
cg25015912
cg03756929
cg09321620
cg24927841
cg24796645
cg16046586
cg13131840
cg15797527
cg02246683
cg01638193
cg20046126
cg10930676
cg25204764
cg12970937
cg23717106
cg01824652
cg25920645
cg24298026
cg26527316
cg06479609
cg06669598
cg19957764
cg16143105
cg19307584
cg19781863
cg11448270
cg13221107
cg02570644
cg23214018
cg11322936
cg04732596
cg20095390
cg04680393
cg13686331
cg06652235
cg07189025
cg10909192
cg12171875
cg15325154
cg17449026
cg12344249
cg25928521
cg05764960
cg03458463
cg12833451
cg18022769
cg20536432
cg12461871
cg02724401
cg07829809
cg07355791
cg15708219
cg10737307
cg08803490
cg15462736
cg07130714
cg26674645
cg07220032
cg21576300
cg25498731
cg16075266
cg20258753
cg11186011
cg07442476
cg16434502
cg03177729
cg06230668
cg06183295
cg24330650
cg17966884
cg24266227
cg07643321
cg16692922
cg23980005
cg17758439
cg23069120
cg00333583
cg24719912
cg21053474
cg17256697
cg16765531
cg24918798
cg06708888
cg05341848
cg02830265
cg14369333
cg11374977
cg16645976
cg08438920
cg09851981
cg07600548
cg13228934
cg07108754
cg04570669
cg23299469
cg02790122
cg24531489
cg27173469
cg17014914
cg06179710
cg11353929
cg03129732
cg13283932
cg02596499
cg11881391
cg25213141
cg12125241
cg02293732
cg18458739
cg12415687
cg21848191
cg24845296
cg03451959
cg21221557
cg25968664
cg10030980
cg20800199
cg23614125
cg25075015
cg18196811
cg21817668
cg01368160
cg20865048
cg25606773
cg04813693
cg03558682
cg13606991
cg18825414
cg02074078
cg27569887
cg19259082
cg02652125
cg27632318
cg18143869
cg00346266
cg04418585
cg04394707
cg23521138
cg05991388
cg17158101
cg00389785
cg18052967
cg19891562
cg25433674
cg08125824
cg21443274
cg25275750
cg18862260
cg23479988
cg17788761
cg03036510
cg09847027
cg26304930
cg24384472
cg17862558
cg03424058
cg03003217
cg16705229
cg04594618
cg20654611
cg26570574
cg19142043
cg24688343
cg05376524
cg18749349
cg15781504
cg09289359
cg13533335
cg26710819
cg04409872
cg01554140
cg13341941
cg14904733
cg16012388
cg19239230
cg00785620
cg24465935
cg26458217
cg26156120
cg05466223
cg23724489
cg22693266
cg17836579
cg18954925
cg14032070
cg12785342
cg23610447
cg11598658
cg24044028
cg19913559
cg06976994
cg11292769
cg16201661
cg07987311
cg14017444
cg12491169
cg06871529
cg03084808
cg08074321
cg02265288
cg15538103
cg11531783
cg07263570
cg20358902
cg03233490
cg07234508
cg12272297
cg16646004
cg22852235
cg21250436
cg16664570
cg03633572
cg20022118
cg14596823
cg24777071
cg01560119
cg14461181
cg05859256
cg11117908
cg12631819
cg09734033
cg18264719
cg06121514
cg14458626
cg00275362
cg19403586
cg03956737
cg23846443
cg05998244
cg19918145
cg05209768
cg02604560
cg21135330
cg01989731
cg03767300
cg12423623
cg18646828
cg04740166
cg23283216
cg03643137
cg18112917
cg22510636
cg23021638
cg18232597
cg13684113
cg15815435
cg22007739
cg11218415
cg13053563
cg01870679
cg24479014
cg21763793
cg12747167
cg19998294
cg21139935
cg02061660
cg04672762
cg08765631
cg19635580
cg00637826
cg02469186
cg00079898
cg08245849
cg14569423
cg23614835
cg21435172
cg10237542
cg00487533
cg10137191
cg08712808
cg13192180
cg15889448
cg08967391
cg10085203
cg26148471
cg17979426
cg13237740
cg00096039
cg06056880
cg27269190
cg24845662
cg18855281
cg07317108
cg13848990
cg08757624
cg21534774
cg05016201
cg08530065
cg04954090
cg07469630
cg06237694
cg10172253
cg19030814
cg10291238
cg05872835
cg17170133
cg06108323
cg19726253
cg04212229
cg15773072
cg11988101
cg01628140
cg24783164
cg18194887
cg11312087
cg14206576
cg09757709
cg22692843
cg16071782
cg19376807
cg20725880
cg14218108
cg00379266
cg19493789
cg16220369
cg25938287
cg01823853
cg20311770
cg11358119
cg26976208
cg23736695
cg10508111
cg20141359
cg13618190
cg15609373
cg27662633
cg02638909
cg07397189
cg23434090
cg20941528
cg10890681
cg14757157
cg01947732
cg12497171
cg18590130
cg00269140
cg22803642
cg20891306
cg19894253
cg23517954
cg01576496
cg23054119
cg07704300
cg19197905
cg03577128
cg27126251
cg08222943
cg26302190
cg07260605
cg02641941
cg00096806
cg18587683
cg11749264
cg12930753
cg11556122
cg22962619
cg02675047
cg18393905
cg07042489
cg01844274
cg12961236
cg24129820
cg08516181
cg16659470
cg16114312
cg03038520
cg19874421
cg23636623
cg20677078
cg22907589
cg15666143
cg10523193
cg00168967
cg07076091
cg17343184
cg14779271
cg06402401
cg09914029
cg16324899
cg13666174
cg26549529
cg08377570
cg27630352
cg17008100
cg20294640
cg23139122
cg23196781
cg08047577
cg01310768
cg26435481
cg17051178
cg11023075
cg00570598
cg04610636
cg03930577
cg20103222
cg19245120
cg15717907
cg04837284
cg01899581
cg01178772
cg08500128
cg10658240
cg18827396
cg23200873
cg02659803
cg24599037
cg23175907
cg26065836
cg13999514
cg13077930
cg00311360
cg07510163
cg22539390
cg01758539
cg00587790
cg22516696
cg08440690
cg25599950
cg01848660
cg07926074
cg17802549
cg06840895
cg09753897
cg23473276
cg22615747
cg05270552
cg22508905
cg18825015
cg21861305
cg24338003
cg13160166
cg09916357
cg01235387
cg21850934
cg13350775
cg01915642
cg20456954
cg23036213
cg25154075
cg14095795
cg16523078
cg26521708
cg05921271
cg09582738
cg00659204
cg07155495
cg12486486
cg25782041
cg06670267
cg12913845
cg27094698
cg21449015
cg11325180
cg20528165
cg07368265
cg06545367
cg27222368
cg00877958
cg15067350
cg10812629
cg23088508
cg21391790
cg16893488
cg24575651
cg24000333
cg24102700
cg15805540
cg25054777
cg18354203
cg16827534
cg02140072
cg22440951
cg05770626
cg06961586
cg16935258
cg20931223
cg06547203
cg05880490
cg24783019
cg25517187
cg25599902
cg26860848
cg01770810
cg17439694
cg14742920
cg23690785
cg06907347
cg00246486
cg01210727
cg07916058
cg22080281
cg21670828
cg15239914
cg17181046
cg15793456
cg11757651
cg25511335
cg10733123
cg13472672
cg09242307
cg25810455
cg17216549
cg11497526
cg17666994
cg26342181
cg18126840
cg07381572
cg14039622
cg00959749
cg26342114
cg10085326
cg12185938
cg13058868
cg22103319
cg11299062
cg07790638
cg09301800
cg21326251
cg02866931
cg09321965
cg04559293
cg09079417
cg14125733
cg06434738
cg11383001
cg22439209
cg16536964
cg24216566
cg08412699
cg03816370
cg11971662
cg08129420
cg26804004
cg18427120
cg01893571
cg20994699
cg20477989
cg21997986
cg24949196
cg23592645
cg01190330
cg01468426
cg17955195
cg24439121
cg15881795
cg07018577
cg02924972
cg04737350
cg17996603
cg04552132
cg21969190
cg18699337
cg26212701
cg12424504
cg06550420
cg06015521
cg24545949
cg24938659
cg08723958
cg26624489
cg15324723
cg06865629
cg09595149
cg00215851
cg21549437
cg23979876
cg19776072
cg03018162
cg12415761
cg11668188
cg26133909
cg12629285
cg16140139
cg13528726
cg14200859
cg18214930
cg24540269
cg14126777
cg23363484
cg02400139
cg13258091
cg12052658
cg06979020
cg26073856
cg22997768
cg18007641
cg16292851
cg19010166
cg04623023
cg14042653
cg17061004
cg25935831
cg17936229
cg24806623
cg12734537
cg24512794
cg09418618
cg13428239
cg04085542
cg15957807
cg27115990
cg25830605
cg19164296
cg11290188
cg14684937
cg03259742
cg20771595
cg13575612
cg17582100
cg09820087
cg08019798
cg26207127
cg08075024
cg17929152
cg00178984
cg16574347
cg03539313
cg03002526
cg17782317
cg05004705
cg21113592
cg18854392
cg10599446
cg15857152
cg25181236
cg18267131
cg10623213
cg18289508
cg13711885
cg02985568
cg02135728
cg22862846
cg18120053
cg25335435
cg27521571
cg16716044
cg03525956
cg14468634
cg10462643
cg07372330
cg22955798
cg07236562
cg27519599
cg16445007
cg15912573
cg04714926
cg10456591
cg08781738
cg00495811
cg25270632
cg20087776
cg05606089
cg26834504
cg17951408
cg24415278
cg27602828
cg25269222
cg24169773
cg13613991
cg05710676
cg08076100
cg00700008
cg18625630
cg05008344
cg16595745
cg10241812
cg25473910
cg17218309
cg16430099
cg14241074
cg18445718
cg10818986
cg18267436
cg16568467
cg25483749
cg09786062
cg04810745
cg21026275
cg20106465
cg26367456
cg18503758
cg17979458
cg07894497
cg16598670
cg04254681
cg08148252
cg09655329
cg10059410
cg13955622
cg16288099
cg09290177
cg20566439
cg24375748
cg26178504
cg26419659
cg21717629
cg10233744
cg16574727
cg18405299
cg17767931
cg08262269
cg00400189
cg20025970
cg17760881
cg14794191
cg25449513
cg13592373
cg01995086
cg23542449
cg13445249
cg05556535
cg15773893
cg13966752
cg12861602
cg23273301
cg02559410
cg03892815
cg12955305
cg08063891
cg01401219
cg17140441
cg18350894
cg18013066
cg14467816
cg08181258
cg09577966
cg21526778
cg03737475
cg09415518
cg25969318
cg09555947
cg23843100
cg05678871
cg12677267
cg18012556
cg00101436
cg02498174
cg04939172
cg16819392
cg21548131
cg02899473
cg10012448
cg05570237
cg09554701
cg02501116
cg00561338
cg26502549
cg08687105
cg18969709
cg08086949
cg09494293
cg27635025
cg08364860
cg07774193
cg13789363
cg06948588
cg11857452
cg26160460
cg23619577
cg26552233
cg13944505
cg23516630
cg00351838
cg04220005
cg21434959
cg12062936
cg24273728
cg09974298
cg10979181
cg23599860
cg08330031
cg17193551
cg22097225
cg21629653
cg01580574
cg02634441
cg09579094
cg09441819
cg00930244
cg01195135
cg16331862
cg01754290
cg17854948
cg17933148
cg08817634
cg11292536
cg21489565
cg13939297
cg04076968
cg04626413
cg08137602
cg00074313
cg21904441
cg20009273
cg18397653
cg01975338
cg02631767
cg18682921
cg18395354
cg23531130
cg27183454
cg08641867
cg10542300
cg18242400
cg10131879
cg26033870
cg21270015
cg22572258
cg00583003
cg15496430
cg13844248
cg25422226
cg10993864
cg17174566
cg19285799
cg22041590
cg24105685
cg12833861
cg00235313
cg20497713
cg24593866
cg01691522
cg22449854
cg06618957
cg04635069
cg09107055
cg07823340
cg05335893
cg19460214
cg03953832
cg26376025
cg26905126
cg10597362
cg21025171
cg01592108
cg16188714
cg22509053
cg10930366
cg14958978
cg17945766
cg13993197
cg02269797
cg19351350
cg09849798
cg08411094
cg22450662
cg22192614
cg18105667
cg21003470
cg22916363
cg06640254
cg23871860
cg19628908
cg27326819
cg17156694
cg04066177
cg04337734
cg19798735
cg10081664
cg04026948
cg17281600
cg24859602
cg06652697
cg19670474
cg26532905
cg20361238
cg05388137
cg21902014
cg23317818
cg25878830
cg19679250
cg11687773
cg04170440
cg03317980
cg20385461
cg03648734
cg00822550
cg05343713
cg06511701
cg15027190
cg16074812
cg10874403
cg06798189
cg16387550
cg03771436
cg11554605
cg13634221
cg15663823
cg11067338
cg11123847
cg23617067
cg19645248
cg24367761
cg23828765
cg12595439
cg02928110
cg05997059
cg03523917
cg09120959
cg12406363
cg26881899
cg18588441
cg13334687
cg23919385
cg07792427
cg14879574
cg04146883
cg19597318
cg00168439
cg24032890
cg00718452
cg02042904
cg16327381
cg20185691
cg14971439
cg14719129
cg22845765
cg13863769
cg04156897
cg26523866
cg17356750
cg25806613
cg22647566
cg07462863
cg26117186
cg11734112
cg14693521
cg02499640
cg14617014
cg22039724
cg20072162
cg27299949
cg09982510
cg26034145
cg04295034
cg08886280
cg07023324
cg08323135
cg27367512
cg21222681
cg17408707
cg09415720
cg15920887
cg24478310
cg12686777
cg01168822
cg02085786
cg27155504
cg22217533
cg05710299
cg15075580
cg16564358
cg01774111
cg05239771
cg05416141
cg00994032
cg16162611
cg19543969
cg04092581
cg08693082
cg26074470
cg02133070
cg23651216
cg25970454
cg03346523
cg19931206
cg08641706
cg13555290
cg07180674
cg26071414
cg21899283
cg02295389
cg24689976
cg10034028
cg12765107
cg18082082
cg12489444
cg26585352
cg02021337
cg16878059
cg00904580
cg06760566
cg04773352
cg15957797
cg20387556
cg04096085
cg07416364
cg24037746
cg23728359
cg19283298
cg19339146
cg11521979
cg15554338
cg17917241
cg00864083
cg16441347
cg11869695
cg16832628
cg15471398
cg00562976
cg14918650
cg12391858
cg00973424
cg16720242
cg20876096
cg03822858
cg00544914
cg24249775
cg11392848
cg27281765
cg15514848
cg16915506
cg01933079
cg09092344
cg11538848
cg12083535
cg14620593
cg23600624
cg11022093
cg03712062
cg15245581
cg11497924
cg19611602
cg18792689
cg11559192
cg15999997
cg03472610
cg00938877
cg20410940
cg02739853
cg26093611
cg24385940
cg16315668
cg26831158
cg11875028
cg04490079
cg09638638
cg08081780
cg12691679
cg01737667
cg26100256
cg26225573
cg25863892
cg22288315
cg01717800
cg22479532
cg01058368
cg05770171
cg07665575
cg12874219
cg08576308
cg24866203
cg08356926
cg27442580
cg00651759
cg09600247
cg07638797
cg15400671
cg21955801
cg24940096
cg13958215
cg05161529
cg04897790
cg03615849
cg20879939
cg21185187
cg24890976
cg22280402
cg26660115
cg11276388
cg24598929
cg24509237
cg21877960
cg25447873
cg08817353
cg07532576
cg03128219
cg03984950
cg11781676
cg02931225
cg14075742
cg10009737
cg11012973
cg04591469
cg05668926
cg17419096
cg18810542
cg07393287
cg10891473
cg12588570
cg00315837
cg26880445
cg23523811
cg27525902
cg26955491
cg16538471
cg12923233
cg09605191
cg03688118
cg08414021
cg27190024
cg11218979
cg16056044
cg08749418
cg20015657
cg22242770
cg22120395
cg15583072
cg11316943
cg12637615
cg05475091
cg10754659
cg09427429
cg27014913
cg00869533
cg23269605
cg08383122
cg26659853
cg13057506
cg08463173
cg08059402
cg19741868
cg00329052
cg20731121
cg07356123
cg13495204
cg27178569
cg15317722
cg22129614
cg00606396
cg23143800
cg10384201
cg14011554
cg27579121
cg10398107
cg21083093
cg04104489
cg26337566
cg25890678
cg22694983
cg12008613
cg19096849
cg05096182
cg21453420
cg05456956
cg04322504
cg15564207
cg04556349
cg07772898
cg21339170
cg09443388
cg00789793
cg26437306
cg13242895
cg22692868
cg26660316
cg21170583
cg14193653
cg02515553
cg22383292
cg05332565
cg06772578
cg20791744
cg09006039
cg11726229
cg12223009
cg10273072
cg04414865
cg23069648
cg19851526
cg16771474
cg02309725
cg27253229
cg22410743
cg26504886
cg26741746
cg18237139
cg26506940
cg03287579
cg04245374
cg11231018
cg10450897
cg22366943
cg04904531
cg22272668
cg10264354
cg00472783
cg08971592
cg16447054
cg25543773
cg19679302
cg21474104
cg06686857
cg18612612
cg26822602
cg16241473
cg02756170
cg20489317
cg21073826
cg04416247
cg13395133
cg22576629
cg26354947
cg12263655
cg04828587
cg12501949
cg20400955
cg07376067
cg09221739
cg05279382
cg14837557
cg00055811
cg05623392
cg21146957
cg22871610
cg19506253
cg25412594
cg04486436
cg15469944
cg27455918
cg06821582
cg00975226
cg08475996
cg10085824
cg27492839
cg18499148
cg04026044
cg27457457
cg04840732
cg00326648
cg12732390
cg21999071
cg21252227
cg16905280
cg03136486
cg01947943
cg15165950
cg11386903
cg06302399
cg23626862
cg22987267
cg19995641
cg23176759
cg09034331
cg17056062
cg00008612
cg09351848
cg21785710
cg22997906
cg15831212
cg19018435
cg09787021
cg17646610
cg22679949
cg14617608
cg24683910
cg17349760
cg16578104
cg01356867
cg19038282
cg07213065
cg23386594
cg11289591
cg19775071
cg20594465
cg08562111
cg26995035
cg00409309
cg03667488
cg00093851
cg26880963
cg07137701
cg04110750
cg05073720
cg05258481
cg12051027
cg09897501
cg05149245
cg17748504
cg26852437
cg27418687
cg18220666
cg14985421
cg07371373
cg21816491
cg14058698
cg18887228
cg25019961
cg12748948
cg01969473
cg20867746
cg24528866
cg09755397
cg24634408
cg18965322
cg21523358
cg22682546
cg26783481
cg26409748
cg22618509
cg25202000
cg16558333
cg12503717
cg14573759
cg12566645
cg13550751
cg01887633
cg22510970
cg00261082
cg20132775
cg22549437
cg13484813
cg15877399
cg05978010
cg16565890
cg26678383
cg10413297
cg23412639
cg11717817
cg24155937
cg09754341
cg10606620
cg14744155
cg04230117
cg27047044
cg18349405
cg05402841
cg23894205
cg08814170
cg02959282
cg07643000
cg23051091
cg17346639
cg08230648
cg07452098
cg13636907
cg25005356
cg13921483
cg10763953
cg02708185
cg13858975
cg24656976
cg06769989
cg06140138
cg11756073
cg06233985
cg14394011
cg12010995
cg23969274
cg13671198
cg15312498
cg21129041
cg27400282
cg19038160
cg19751990
cg01224884
cg25082361
cg13116816
cg23122570
cg08128148
cg26354721
cg14158769
cg22885000
cg21797500
cg08699575
cg17807683
cg27235228
cg14987002
cg24633967
cg05271336
cg22691626
cg05372370
cg00939442
cg05975755
cg17977556
cg26794418
cg23279317
cg12658552
cg23636097
cg09751728
cg19839601
cg25502818
cg19521384
cg18237739
cg19366178
cg13865248
cg26179544
cg14781826
cg09403480
cg13463167
cg19138499
cg18827501
cg15529551
cg18899818
cg14376033
cg02030141
cg26679158
cg03459617
cg14364844
cg12891810
cg08442037
cg20740102
cg03710714
cg18761763
cg02217586
cg03627944
cg01704609
cg14211983
cg01843018
cg16420520
cg08660064
cg00844078
cg26406186
cg08368094
cg00771217
cg08580056
cg17791489
cg03792839
cg20655220
cg01431559
cg00393283
cg22990543
cg18432877
cg20031632
cg19702383
cg14511498
cg23893406
cg19173502
cg14343962
cg22831264
cg13065475
cg19464419
cg23889393
cg08375941
cg26947733
cg00385983
cg00387117
cg09449012
cg08239325
cg13177860
cg06926343
cg22094163
cg13219552
cg12229387
cg15873908
cg20315445
cg25566141
cg02309157
cg20592691
cg22451149
cg01143222
cg04901623
cg08617354
cg25541666
cg08356509
cg25825391
cg02952379
cg24402990
cg15724328
cg08003102
cg10766792
cg09722826
cg09228015
cg20666019
cg14550265
cg02098905
cg24857560
cg23794135
cg20211778
cg25035320
cg00405803
cg23136573
cg04048461
cg01532589
cg07840454
cg05202389
cg00655147
cg05875121
cg03562117
cg05533210
cg19680257
cg13861413
cg05335107
cg10421435
cg15361251
cg06491827
cg17945004
cg06522557
cg02327001
cg05381383
cg21381779
cg25206451
cg15069247
cg11380072
cg13364749
cg22803989
cg11669124
cg27221554
cg01513086
cg12635662
cg08570346
cg21336181
cg26215807
cg25491247
cg07091934
cg01095395
cg16745844
cg17197065
cg14134015
cg25741597
cg14717069
cg25173392
cg20941737
cg09568252
cg05227523
cg02688903
cg21212505
cg06083252
cg14544087
cg16682576
cg16255804
cg09115009
cg15617591
cg18745965
cg18964251
cg18295261
cg24690060
cg16873385
cg22189125
cg10483534
cg10082398
cg13217658
cg03839102
cg18068521
cg05309399
cg07262168
cg17001457
cg17084358
cg05779991
cg14500932
cg04561294
cg11346128
cg08610281
cg09366397
cg12191300
cg07625992
cg26231350
cg23151860
cg04819081
cg10421214
cg12944192
cg17212000
cg25903860
cg02324249
cg05661243
cg06829157
cg17374958
cg04644523
cg09982883
cg06377993
cg03177735
cg03771981
cg27311397
cg08459169
cg03293350
cg22295334
cg09315465
cg10389936
cg20088913
cg13876366
cg11520439
cg18410494
cg16175294
cg03508767
cg16534298
cg13103179
cg14233604
cg05320089
cg14406501
cg18753294
cg12523675
cg12059424
cg10882756
cg04912993
cg09638116
cg01456229
cg14305943
cg24739457
cg03641740
cg10591943
cg17448223
cg27130993
cg01632260
cg14258154
cg10021941
cg00151491
cg19093782
cg25099021
cg09148486
cg05339847
cg12519470
cg18649133
cg24315340
cg00861856
cg15711240
cg10438564
cg13829041
cg14491890
cg11304838
cg07909692
cg07356905
cg15549767
cg18767244
cg18406531
cg05095466
cg12690929
cg09433558
cg26442509
cg14476670
cg19380394
cg01311909
cg07810677
cg16953031
cg02197005
cg20043202
cg04171487
cg14130119
cg06820405
cg06489586
cg23680411
cg00180559
cg08463715
cg21981481
cg25464787
cg13660086
cg27036054
cg03893339
cg20253302
cg11458618
cg20561213
cg15380115
cg13165846
cg04300553
cg16430955
cg25335258
cg05143332
cg08291435
cg09459548
cg14502625
cg13073409
cg13442811
cg12210094
cg05346963
cg14966236
cg11423701
cg04010286
cg09841898
cg17892601
cg08898866
cg11754185
cg01693326
cg17282428
cg08857436
cg21573345
cg27386033
cg11211384
cg07040220
cg11952239
cg01008726
cg23719367
cg25992775
cg22228737
cg27383174
cg04468128
cg06548892
cg09814167
cg08951078
cg00655498
cg13497017
cg17744037
cg08582028
cg18127619
cg07275552
cg10327801
cg09933345
cg24340640
cg14243616
cg03952109
cg10372238
cg16516973
cg27039983
cg09075137
cg09288320
cg20390545
cg13600216
cg12255352
cg03967533
cg27511206
cg27447753
cg09610766
cg08634545
cg15997204
cg07513789
cg22509807
cg17640684
cg25633045
cg08977209
cg16101804
cg16427530
cg25764131
cg20475005
cg00749969
cg08559459
cg26345444
cg11302992
cg07252539
cg01783195
cg13813086
cg19763997
cg01574823
cg13480157
[truncated: 6,324 more rows]

## Sheet: Table S2
Table S2 - cis slope QTLs
Table of the lead SNP CpG pairs for each independent cis slope-QTL uncovered in the LBC cohort.
The P-value of the association and Benjamini Hochberg corrected FDR are both given.
The effect size is given as change in slope per allele
SNP ID	CpG probe ID	P-value	FDR	Effect size (Beta)
rs639216	cg20485607	1.3728e-56	5.52463e-49	0.0124783
rs7102510	cg15696309	3.78702e-42	1.13594e-35	0.00534352
rs2580765	cg09592903	4.38804e-42	1.17727e-35	-0.00777022
rs7219318	cg11949518	6.74827e-42	1.69734e-35	0.011487
rs7464436	cg09584650	4.29454e-34	2.92929e-28	-0.00931939
rs9972206	cg02291164	1.89555e-33	1.21255e-27	-0.00707243
rs708727	cg07167872	7.92311e-33	4.9821e-27	-0.0100619
rs9376628	cg15052665	3.79432e-31	2.03689e-25	-0.00879936
rs12745508	cg00112952	5.80895e-31	3.03601e-25	-0.0108955
rs555097	cg15971518	5.93494e-31	3.06209e-25	-0.00772587
rs2420936	cg16273546	1.31262e-27	4.51493e-22	0.00848032
rs13391356	cg07618928	4.66945e-26	1.35191e-20	0.00154858
rs4045957	cg17920646	1.05404e-24	2.5249e-19	-0.00853425
rs11711054	cg07743747	3.17531e-23	5.83498e-18	-0.00773523
rs10896825	cg09235983	8.77728e-23	1.47795e-17	-0.00739301
rs283025	cg14503564	1.03429e-22	1.67162e-17	0.00571075
rs4924785	cg19949948	1.96971e-22	3.07241e-17	0.00590101
rs2535392	cg26371957	6.39915e-22	9.29693e-17	0.00856649
rs1471132	cg26371957	8.30497e-18	5.80246e-13	-0.00767584
rs1034250	cg04798314	1.54506e-21	2.12215e-16	-0.00765126
rs4654274	cg04798314	7.52135e-17	4.53123e-12	0.00762444
rs9266825	cg12182649	3.12077e-21	3.90034e-16	-0.00880285
rs10935002	cg04947385	5.90891e-21	7.09838e-16	0.00639936
rs7590255	cg23497611	1.23945e-20	1.40904e-15	0.00518251
rs9326078	cg22082780	1.91758e-19	1.79884e-14	-0.00660823
rs10083027	cg11799593	3.2163e-19	2.88918e-14	-0.00464333
rs2077670	cg17584477	3.30586e-19	2.94988e-14	-0.00230421
rs208104	cg14844989	4.37725e-19	3.86308e-14	-0.00512466
rs6770142	cg01292810	4.72549e-18	3.44512e-13	-0.00519869
rs6743832	cg21819782	6.00317e-18	4.2911e-13	-0.00604117
rs10207932	cg16163168	6.46644e-18	4.58157e-13	0.00451121
rs3757316	cg17179660	7.15426e-18	5.00719e-13	0.000460023
rs1056522	cg18664965	1.01608e-17	6.88399e-13	-0.00457034
rs4045957	cg24536782	1.42352e-17	9.34543e-13	-0.00695297
rs7619011	cg23730617	1.66809e-17	1.08977e-12	-0.00291496
rs2251746	cg09064148	2.02505e-17	1.31233e-12	0.00382463
rs2301271	cg11530659	2.51131e-17	1.60165e-12	0.00142392
rs16933086	cg25813936	7.6496e-17	4.6016e-12	0.00706858
rs776	cg02287004	8.84084e-17	5.27092e-12	-0.00306553
rs10483038	cg20424643	1.8598e-16	1.04241e-11	-0.00342996
rs171094	cg14279361	2.12938e-16	1.16432e-11	-0.00623614
rs11672613	cg14279361	1.18292e-06	0.0048443	0.00363337
rs212787	cg25075347	2.32742e-16	1.25387e-11	-0.00538589
rs1113431	cg02648298	2.3899e-16	1.2858e-11	-0.00228991
rs2062588	cg15948536	2.82993e-16	1.49851e-11	-0.0063042
rs10090179	cg19504605	2.84998e-16	1.50136e-11	0.00395048
rs10864363	cg06159269	2.8728e-16	1.51126e-11	-0.00322953
rs1800759	cg12011299	3.32434e-16	1.72624e-11	0.00506221
rs1025624	cg14306366	3.57911e-16	1.84426e-11	0.00345074
rs7779057	cg00530438	7.58001e-16	3.60575e-11	-0.00598757
rs1497077	cg20550154	8.3356e-16	3.92804e-11	-0.0046332
rs1010366	cg16101574	9.29681e-16	4.33029e-11	-0.00694773
rs7936622	cg11217654	1.04811e-15	4.83157e-11	-0.00217585
rs11603071	cg17284609	1.67615e-15	7.332e-11	-0.00454216
rs1833037	cg11694362	3.29836e-15	1.34079e-10	0.00138702
rs12745466	cg11694362	1.80812e-10	2.35945e-06	-0.00112232
rs3918349	cg17851604	3.3334e-15	1.35366e-10	0.00568635
rs11902994	cg23527387	3.64101e-15	1.46089e-10	0.00401552
rs2512726	cg03187668	5.70547e-15	2.22274e-10	-0.00513491
rs1488373	cg16992008	5.99873e-15	2.31236e-10	0.00147343
rs3757316	cg10883421	7.23243e-15	2.74584e-10	0.000403787
rs4443717	cg14178348	8.43569e-15	3.15211e-10	0.001883
rs1490051	cg12375561	8.98056e-15	3.3402e-10	-0.0022089
rs2653601	cg00186954	1.39955e-14	4.96236e-10	0.00290128
rs8037284	cg03314013	2.52455e-14	8.27336e-10	0.00196365
rs10274707	cg25418001	2.90554e-14	9.35435e-10	-0.00495735
rs6763735	cg07480608	3.25328e-14	1.03171e-09	-0.00402556
rs2955355	cg23957660	3.50368e-14	1.09985e-09	-0.00224575
rs1033717	cg17485717	4.09547e-14	1.26684e-09	0.00600944
rs2741718	cg26795848	4.37642e-14	1.35063e-09	-0.00398182
rs1430410	cg01201279	4.71946e-14	1.44103e-09	0.00499289
rs7776356	cg09547025	4.87601e-14	1.48545e-09	0.00606642
rs710567	cg03343083	6.45972e-14	1.91996e-09	0.00596668
rs12513498	cg25076039	6.81387e-14	2.01925e-09	0.00324495
rs3094654	cg10804687	8.61272e-14	2.5062e-09	-0.00174015
rs11634726	cg17916960	1.56172e-13	4.37975e-09	-0.00428835
rs7498878	cg07524214	2.02376e-13	5.5141e-09	0.0043208
rs872945	cg04754454	2.57614e-13	6.89317e-09	0.00242566
rs4891559	cg25817165	2.89066e-13	7.65332e-09	0.00542267
rs2037190	cg11937849	4.71734e-13	1.16898e-08	-0.0028899
rs4698457	cg00555420	5.36788e-13	1.31481e-08	0.00429417
rs28772724	cg17480035	5.89784e-13	1.43068e-08	0.0065842
rs1401568	cg25518348	6.73173e-13	1.62221e-08	-0.000950939
rs2731647	cg12580445	1.3504e-12	3.04794e-08	-0.00435169
rs9302109	cg01768344	1.48671e-12	3.33132e-08	0.000821934
rs8057673	cg04390829	1.80569e-12	3.97088e-08	0.0013891
rs7611274	cg26854140	1.87398e-12	4.09646e-08	0.0012869
rs1317290	cg18685330	2.10167e-12	4.53749e-08	-0.0044001
rs179171	cg02312715	2.92088e-12	6.15749e-08	-0.00254536
rs556759	cg24851651	2.99793e-12	6.30343e-08	-0.0034365
rs7241727	cg05134926	3.34281e-12	6.93794e-08	-0.00406652
rs6699938	cg00114966	3.62671e-12	7.48087e-08	0.00382125
rs7697290	cg16518176	3.70666e-12	7.63015e-08	0.00305175
rs6816703	cg13735402	4.03944e-12	8.2393e-08	0.000557332
rs13311962	cg03233332	4.68381e-12	9.44829e-08	0.0043668
rs12325474	cg02918093	4.72701e-12	9.53066e-08	-0.00271334
rs807491	cg18805164	5.15152e-12	1.03038e-07	-0.00563227
rs12189352	cg14868212	5.69638e-12	1.12154e-07	-0.00353995
rs1530344	cg20849935	5.73076e-12	1.12501e-07	0.00402429
rs10401177	cg10188349	5.79324e-12	1.13616e-07	-0.00184975
rs1485587	cg15871215	8.54667e-12	1.61478e-07	0.0056209
rs4731190	cg11557463	9.3124e-12	1.74147e-07	-0.00450207
rs2683236	cg08662227	1.02022e-11	1.88855e-07	-0.00664491
rs11122571	cg10442549	1.18524e-11	2.13989e-07	-0.00243676
rs1016472	cg16061301	1.22184e-11	2.20104e-07	0.00242509
rs255277	cg25980539	1.31818e-11	2.35247e-07	0.00350755
rs9112	cg02601475	1.63781e-11	2.84406e-07	-0.0040871
rs4619637	cg22411472	2.4085e-11	4.064e-07	0.00143535
rs2147105	cg16720578	2.75789e-11	4.56601e-07	0.00392478
rs12679827	cg23549331	2.84063e-11	4.67937e-07	-0.00484917
rs7005444	cg23549331	5.02529e-11	7.69975e-07	-0.00505831
rs2164169	cg02046532	2.9042e-11	4.77237e-07	-0.00284661
rs1651895	cg15765251	2.98711e-11	4.88468e-07	-0.0033779
rs12478240	cg25430507	3.14851e-11	5.11329e-07	0.00189569
rs9535102	cg11925609	3.25341e-11	5.26241e-07	-0.00391603
rs17305311	cg11569329	3.68074e-11	5.8548e-07	0.00335367
rs1868031	cg19318364	4.28451e-11	6.69348e-07	0.0044132
rs11189552	cg03563354	5.26509e-11	8.02295e-07	0.00208728
rs7660542	cg27417997	5.82487e-11	8.77626e-07	-0.00455716
rs11096936	cg05111603	5.96518e-11	8.96417e-07	-0.00387252
rs2339893	cg06209897	6.47489e-11	9.65084e-07	-0.00431759
rs1561389	cg26367197	6.55763e-11	9.76332e-07	0.00296638
rs4637783	cg03566001	6.90208e-11	1.02345e-06	0.00636829
rs7378969	cg19459207	7.48071e-11	1.09712e-06	0.00384195
rs4875928	cg06440275	9.72029e-11	1.38031e-06	-0.00319615
rs1822036	cg06440275	2.23314e-08	0.000161317	0.0024027
rs3127462	cg14649566	1.01797e-10	1.43827e-06	-0.00240758
rs9356940	cg16906346	1.05354e-10	1.48557e-06	0.00254713
rs2808079	cg04359828	1.06683e-10	1.49909e-06	0.00280285
rs4875928	cg03243893	1.13826e-10	1.58723e-06	-0.00340617
rs2852836	cg13820391	1.14957e-10	1.59805e-06	0.00229934
rs2044869	cg23203918	1.26459e-10	1.73635e-06	-0.00171588
rs2239503	cg02722637	1.27145e-10	1.74276e-06	-0.00424615
rs7101437	cg04055981	1.30127e-10	1.77638e-06	0.00156757
rs11880808	cg14725151	1.32545e-10	1.80266e-06	-0.000482644
rs11724609	cg04285362	1.34371e-10	1.8238e-06	0.00372062
rs6491307	cg09122588	1.39255e-10	1.87618e-06	0.00571146
rs6731687	cg08321382	1.41013e-10	1.89478e-06	0.00198305
rs486816	cg25407064	1.52528e-10	2.02784e-06	0.000530543
rs7020282	cg21243750	1.52733e-10	2.02978e-06	-0.00171635
rs10222974	cg13593192	1.58306e-10	2.09497e-06	-0.00570293
rs12190473	cg05716726	1.9516e-10	2.53271e-06	-0.00394914
rs1156086	cg05716726	3.22035e-10	3.93916e-06	-0.00370889
rs7712760	cg07322898	2.38975e-10	3.0346e-06	-0.00255315
rs3769252	cg08754268	2.52964e-10	3.18407e-06	0.00256208
rs11937288	cg00431894	2.5707e-10	3.22499e-06	-0.00520879
rs7936723	cg08012199	2.72715e-10	3.3968e-06	0.000565548
rs6691782	cg24361198	2.8256e-10	3.5064e-06	0.00308944
rs7418599	cg24361198	7.13187e-08	0.000444016	0.00261177
rs12652098	cg26626449	2.91088e-10	3.60222e-06	0.0044421
rs2321997	cg22140866	3.22777e-10	3.94464e-06	0.00370731
rs9395285	cg12968598	3.55041e-10	4.29718e-06	-0.00421478
rs2440335	cg06524553	3.58438e-10	4.33569e-06	0.00157797
rs7748174	cg10134833	3.77832e-10	4.54569e-06	-0.00189946
rs373855	cg10470891	3.98559e-10	4.76372e-06	0.00422202
rs734290	cg01029637	4.02671e-10	4.80431e-06	-0.00263833
rs835880	cg01029637	1.49529e-06	0.00588726	0.00185345
rs4723924	cg13264672	4.14819e-10	4.92879e-06	0.00357284
rs12570348	cg04497547	4.61837e-10	5.42815e-06	-0.00020142
rs12925527	cg01449973	4.66086e-10	5.4701e-06	0.00330524
rs12989971	cg24929896	4.6957e-10	5.50617e-06	-0.00159379
rs2394255	cg06889979	4.78757e-10	5.60084e-06	0.0015122
rs11168740	cg11661914	5.65262e-10	6.49577e-06	-0.00447683
rs17112008	cg26671749	5.7757e-10	6.62231e-06	-0.00101247
rs12415091	cg14149699	5.7759e-10	6.62231e-06	0.000927397
rs13256474	cg10147462	5.81513e-10	6.66159e-06	-0.00284096
rs451195	cg19077854	6.57095e-10	7.41971e-06	0.00147971
rs7087336	cg05278858	6.74725e-10	7.58898e-06	0.00313474
rs907396	cg27398640	6.99177e-10	7.83772e-06	0.00334503
rs9316393	cg15108060	7.02667e-10	7.86937e-06	-0.0068246
rs9494155	cg21276456	8.01837e-10	8.83593e-06	-0.00141859
rs12903325	cg21670987	8.98917e-10	9.73438e-06	-0.00329718
rs11136620	cg23564432	9.68007e-10	1.03772e-05	0.00352579
rs10490169	cg23851515	9.85032e-10	1.05485e-05	0.00391883
rs661171	cg05839709	9.93971e-10	1.06357e-05	-0.00311003
rs2188714	cg22709100	1.0337e-09	1.10286e-05	-0.00737773
rs1383966	cg22651812	1.12253e-09	1.18685e-05	0.00397662
rs4728147	cg07211516	1.19466e-09	1.25103e-05	0.00171834
rs9261453	cg19495308	1.25837e-09	1.30992e-05	-0.0042996
rs5000634	cg19301366	1.30069e-09	1.3477e-05	0.00294775
rs1692120	cg23038520	1.31926e-09	1.36343e-05	-0.00168957
rs349416	cg24735225	1.3216e-09	1.36479e-05	-0.00323411
rs9302176	cg00626386	1.36195e-09	1.39642e-05	-0.0010276
rs2132157	cg21039679	1.47736e-09	1.50023e-05	-0.00171532
rs8023192	cg07967723	1.49694e-09	1.5182e-05	0.00368983
rs12706933	cg15691775	1.5007e-09	1.52125e-05	0.000264208
rs17562397	cg15691775	7.57344e-09	6.25708e-05	-0.000242915
rs887649	cg07080556	1.55468e-09	1.56925e-05	-0.00124268
rs2468811	cg06344784	1.66292e-09	1.66639e-05	-0.00239984
rs757102	cg26043460	1.6849e-09	1.68422e-05	-0.00260742
rs17351243	cg05916196	1.70732e-09	1.70493e-05	-0.000948409
rs883263	cg27085265	1.90837e-09	1.88004e-05	-0.000932379
rs202102	cg04551440	1.9224e-09	1.89109e-05	-0.000608225
rs6942824	cg16692494	2.03431e-09	1.99235e-05	0.00216576
rs1155458	cg27125364	2.0834e-09	2.02962e-05	0.00190909
rs2301134	cg01966878	2.17568e-09	2.10774e-05	0.00367563
rs3817043	cg14040899	2.41918e-09	2.31526e-05	-0.00112897
rs7405640	cg05454957	2.73674e-09	2.58536e-05	0.00151289
rs1718119	cg26656658	2.94088e-09	2.75539e-05	-0.00525516
rs2302719	cg04521981	3.03148e-09	2.82402e-05	0.00170173
rs617873	cg10318641	3.07698e-09	2.85846e-05	0.00132411
rs2293496	cg21877010	3.27979e-09	3.019e-05	0.00118106
rs26899	cg06952129	3.47972e-09	3.17489e-05	-0.00589509
rs7320510	cg10512779	3.71054e-09	3.35266e-05	0.00210008
rs12422699	cg20261440	3.8327e-09	3.44407e-05	-0.00336268
rs1138465	cg18831671	4.20183e-09	3.73364e-05	-0.00113354
rs306169	cg11127569	4.29558e-09	3.80435e-05	-0.000974413
rs1292646	cg21116077	4.82607e-09	4.21481e-05	0.00333658
rs4655890	cg18202412	5.51061e-09	4.74469e-05	-0.00253926
rs4791284	cg22660033	5.53981e-09	4.76779e-05	0.00332584
rs7094698	cg10865127	5.88207e-09	5.02154e-05	0.00125276
rs6938061	cg14926196	5.99148e-09	5.10412e-05	-0.00430719
rs722410	cg12759523	6.40505e-09	5.40859e-05	-0.00410776
rs1375013	cg04265964	6.52809e-09	5.49265e-05	0.0048354
rs2452593	cg17815886	6.53559e-09	5.49667e-05	-0.0021224
rs1128585	cg16427107	6.67498e-09	5.60867e-05	-0.00507134
rs4901511	cg02270243	6.67754e-09	5.60902e-05	0.00250306
rs7339081	cg07926092	7.35825e-09	6.10184e-05	-0.00426649
rs13124511	cg19463078	7.43735e-09	6.16109e-05	0.00458725
rs10076782	cg26403843	7.55387e-09	6.24268e-05	-0.00300858
rs3827737	cg15064681	7.64826e-09	6.31501e-05	-0.00197441
rs4689866	cg07891820	7.9448e-09	6.53037e-05	-0.0032535
rs2297778	cg03651715	8.11607e-09	6.66027e-05	-0.00296275
rs9316393	cg05801989	8.44759e-09	6.89296e-05	0.000461051
rs7619865	cg20734569	8.52227e-09	6.94546e-05	0.00361407
rs397020	cg16922058	8.55597e-09	6.96728e-05	-0.000651477
rs3904095	cg19272349	8.72852e-09	7.08628e-05	0.00373809
rs11774069	cg15463563	9.49719e-09	7.62268e-05	-0.00197436
rs12954590	cg05121497	9.77264e-09	7.8095e-05	-0.00409652
rs215690	cg20110742	9.77507e-09	7.80988e-05	0.00245442
rs919276	cg07809484	9.8263e-09	7.84459e-05	-0.00424634
rs7993394	cg08381562	1.03231e-08	8.18436e-05	0.00464948
rs9892363	cg00007215	1.07893e-08	8.51876e-05	0.00371496
rs9922011	cg02380802	1.09891e-08	8.65439e-05	-0.00378293
rs763809	cg22609511	1.12263e-08	8.80507e-05	0.00469837
rs9326845	cg18054620	1.13257e-08	8.87335e-05	-0.00250023
rs17377643	cg00369909	1.23677e-08	9.57705e-05	-0.000809719
rs2038921	cg03948048	1.25847e-08	9.7152e-05	-0.00170366
rs10162426	cg24108579	1.28778e-08	9.91675e-05	-0.000935046
rs6987802	cg26558023	1.31938e-08	0.000101407	0.00496082
rs7946556	cg09667753	1.3338e-08	0.000102398	-0.00432039
rs3873260	cg04246123	1.40616e-08	0.00010726	-0.00483345
rs1034316	cg03746930	1.42864e-08	0.000108751	0.00137003
rs7130248	cg03368665	1.45506e-08	0.000110505	-0.00115526
rs3823375	cg17134700	1.5599e-08	0.000117536	0.003772
rs490633	cg07424927	1.5629e-08	0.000117675	-0.00408261
rs12293167	cg00013006	1.5632e-08	0.000117675	-0.000922129
rs1328965	cg10816283	1.58839e-08	0.000119325	-0.00165656
rs6422414	cg24880022	1.67327e-08	0.000124955	0.00109662
rs3777677	cg07285237	1.68983e-08	0.000125981	0.0035102
rs3006069	cg14843632	1.74792e-08	0.000129759	0.00427889
rs10786044	cg10452581	1.7521e-08	0.000130022	-0.00292063
rs6903608	cg13318793	1.7672e-08	0.000130973	0.00637537
rs10095483	cg22594214	1.82034e-08	0.000134392	0.00181919
rs10090201	cg20227326	1.82794e-08	0.000134903	0.00190615
rs17052396	cg22648282	1.87412e-08	0.000138084	0.00401598
rs1011870	cg04074153	1.90499e-08	0.000140051	0.00340196
rs4045957	cg14317384	1.97729e-08	0.000144837	-0.00504077
rs2284060	cg14247180	1.98368e-08	0.000145173	-0.00253025
rs1617837	cg03652564	2.0395e-08	0.000148797	0.00111002
rs1062748	cg07612300	2.0765e-08	0.000151186	-0.00117572
rs11766216	cg11236311	2.08647e-08	0.000151784	-0.00167062
rs980299	cg25700686	2.49434e-08	0.000177603	-0.00442935
rs1481792	cg25700686	2.06691e-07	0.00111516	-0.00395894
rs6899076	cg11847992	2.56548e-08	0.000181831	-0.00345322
rs4670876	cg13022624	2.72572e-08	0.000191436	0.00137253
rs10875883	cg07462861	3.22393e-08	0.000222505	-0.00173048
rs870959	cg17996830	3.27019e-08	0.000225388	0.00354233
rs1343652	cg26194641	3.34417e-08	0.000229975	0.00103706
rs1635291	cg12609785	3.35848e-08	0.000230841	-0.003862
rs2889606	cg00160872	3.482e-08	0.000238111	-0.00534509
rs17721404	cg00160872	1.6777e-07	0.000931134	0.00503617
rs3826007	cg24924631	3.48815e-08	0.000238329	-0.00308634
rs2732842	cg07720865	3.49148e-08	0.000238435	0.00502549
rs7683984	cg15330419	3.55774e-08	0.000242138	0.000983228
rs7149337	cg23942311	3.56085e-08	0.000242226	0.00202627
rs10733543	cg13556767	3.69159e-08	0.000250345	0.001815
rs1319501	cg05004518	3.6977e-08	0.000250689	0.0050688
rs2589939	cg25186680	3.7044e-08	0.000251058	0.000717645
rs6850750	cg07829377	3.76846e-08	0.00025497	-0.00192987
rs3811759	cg22289785	3.85666e-08	0.000260544	0.00409294
rs653242	cg13077366	3.90286e-08	0.0002634	-0.00245359
rs3810204	cg21956434	4.31756e-08	0.000288054	-0.0033918
rs3745185	cg21956434	6.90759e-07	0.00308874	0.00286631
rs1383267	cg03465320	4.60771e-08	0.000304584	0.00366716
rs17289394	cg09798090	4.67898e-08	0.000308383	0.00170393
rs242557	cg04491389	4.97085e-08	0.000325329	-0.00147328
rs12938031	cg04491389	4.5961e-07	0.00219182	0.00137916
rs2788853	cg07791160	4.97348e-08	0.000325395	-0.00282506
rs9358450	cg00955808	5.00742e-08	0.00032735	-0.00380957
rs1789250	cg26662520	5.27494e-08	0.000342667	-0.00226314
rs17370615	cg11714334	5.32695e-08	0.000345377	-0.000238006
rs12067861	cg08240383	5.45046e-08	0.00035259	-0.0028296
rs3130304	cg08976526	5.48826e-08	0.000354864	0.00194802
rs2412322	cg11440486	5.50917e-08	0.00035593	-0.00222074
rs1724425	cg21214508	5.56942e-08	0.000359361	0.00136957
rs7243054	cg14166494	5.76435e-08	0.000369804	0.00306169
rs3107151	cg26910870	5.99383e-08	0.000382112	0.00299098
rs2941054	cg18508148	6.32743e-08	0.000400501	0.000296668
rs6731238	cg02550950	6.40129e-08	0.000404349	-0.00335645
rs2778672	cg09642378	6.55114e-08	0.000412391	0.0021521
rs7087438	cg07771287	6.69144e-08	0.00041906	0.00312877
rs5759093	cg07593264	6.82962e-08	0.00042685	0.00111005
rs4148324	cg08697797	6.88269e-08	0.000429632	-0.00194356
rs1984584	cg20730595	6.93115e-08	0.000432148	-0.00361191
rs7311233	cg25459280	7.03718e-08	0.000438257	-0.00394234
rs6433294	cg15701714	7.15637e-08	0.000445266	-0.00133673
rs10173317	cg27597853	7.23573e-08	0.000449926	0.00315371
rs2142138	cg00943985	7.56506e-08	0.000466663	0.000937979
rs2420936	cg18566515	7.69719e-08	0.000473571	0.00234231
rs6421967	cg17547742	7.93545e-08	0.000485853	0.00166355
rs747472	cg13384849	8.36049e-08	0.000509088	-0.00130748
rs6577052	cg20022454	8.64577e-08	0.000523908	0.00444477
rs6960062	cg10204951	9.84636e-08	0.000587738	-0.000362433
rs7097573	cg22845855	1.0061e-07	0.000598683	-0.00106928
rs7339081	cg05295671	1.02412e-07	0.000608331	-0.00190605
rs1969869	cg24853868	1.04042e-07	0.000616737	-0.00380693
rs6960994	cg25907594	1.06161e-07	0.000627816	0.00216859
rs4852706	cg22039638	1.06882e-07	0.000631342	0.00224272
rs13146272	cg11969330	1.09792e-07	0.000645779	0.00595353
rs4842653	cg00757033	1.10926e-07	0.00065112	-0.00521664
rs11208377	cg08036553	1.11616e-07	0.000654407	0.0044133
rs11783855	cg24465384	1.12131e-07	0.000656849	0.00122068
rs3826828	cg00419186	1.14788e-07	0.000670561	0.000601363
rs7160227	cg15815318	1.18129e-07	0.000688078	0.00255816
rs6772499	cg15036157	1.18646e-07	0.000690789	0.00658073
rs9857252	cg14220170	1.19051e-07	0.000692548	0.00292384
rs7564520	cg20822693	1.23445e-07	0.000714902	0.0025642
rs2599396	cg21158075	1.24967e-07	0.000722781	-0.00302787
rs4262083	cg23068621	1.28357e-07	0.000739855	-0.00248899
rs6816548	cg17542795	1.30562e-07	0.000749249	-0.00531714
rs708724	cg16031515	1.311e-07	0.000752095	0.00381796
rs7582137	cg23206520	1.35858e-07	0.000775517	0.00261252
rs2064721	cg21351392	1.37432e-07	0.000783171	0.00451052
rs746731	cg21351392	1.50247e-06	0.00590938	-0.00489133
rs7180844	cg21700663	1.37889e-07	0.000785339	-0.0029168
rs3740304	cg19082416	1.38663e-07	0.00078918	-0.0020513
rs17370615	cg22147449	1.39556e-07	0.000793704	-0.000170743
rs7143959	cg20512044	1.41108e-07	0.000801623	-0.000477139
rs9296097	cg06253072	1.43995e-07	0.000816067	-0.00177664
rs12655145	cg03212797	1.46754e-07	0.000829828	-0.000638617
rs9347340	cg11366901	1.50408e-07	0.000848463	-0.000274304
rs2024100	cg00176740	1.50517e-07	0.000848844	-0.00108981
rs7827372	cg17721355	1.51373e-07	0.000852594	0.00306765
rs4305581	cg09943401	1.53127e-07	0.000860911	0.00265839
rs2613996	cg22993527	1.58914e-07	0.000888356	-0.000697762
rs12220651	cg26334209	1.60485e-07	0.000896266	0.00159376
rs1001450	cg17722884	1.62646e-07	0.000907074	-0.000917484
rs1016528	cg20130571	1.72225e-07	0.000951744	-0.00372521
rs13435787	cg15264404	1.7224e-07	0.000951744	-0.00379409
rs2074546	cg14954836	1.73551e-07	0.000958078	0.00146526
rs2339893	cg06976598	1.82219e-07	0.000999066	-0.00316303
rs10890774	cg12974393	1.82637e-07	0.00100095	-0.00459554
rs11159841	cg18078958	1.87455e-07	0.00102484	-0.00139315
rs7909243	cg13799081	1.9144e-07	0.00104365	-0.00381335
rs4768730	cg09447675	1.91747e-07	0.00104518	-0.00337166
rs6966915	cg23422036	1.92527e-07	0.00104858	0.000280253
rs7309	cg13854012	2.09536e-07	0.00112824	-0.00250888
rs2467248	cg18229049	2.11917e-07	0.00113923	0.00192313
rs4722187	cg02463988	2.12856e-07	0.00114352	0.00190182
rs7711188	cg02002240	2.14895e-07	0.00115262	0.00505943
rs11635675	cg20547806	2.20284e-07	0.00117683	0.000489042
rs13396069	cg14989714	2.23499e-07	0.00119188	-0.00414358
rs13021385	cg14989714	4.02812e-07	0.00196159	0.00409031
rs1851665	cg12454167	2.25048e-07	0.00119798	-0.00362395
rs1158569	cg16277922	2.25798e-07	0.00120134	0.00528649
rs4975625	cg12637397	2.28863e-07	0.00121572	-0.00174484
rs1477502	cg23363182	2.35017e-07	0.00124545	0.0056679
rs2318095	cg25680145	2.3583e-07	0.0012491	-0.0040554
rs4580814	cg02762475	2.36495e-07	0.00125229	0.00257648
rs1407575	cg23734418	2.39677e-07	0.00126747	-0.00336527
rs7431819	cg12898595	2.43747e-07	0.0012868	-0.00123961
rs2403205	cg18984103	2.4451e-07	0.00128998	0.00269367
rs9904377	cg26251398	2.48393e-07	0.00130704	-0.00125454
rs4687360	cg07620573	2.50536e-07	0.00131556	0.00426544
rs719785	cg07587209	2.546e-07	0.00133377	0.000585697
rs2236225	cg09223940	2.55753e-07	0.00133894	-0.00124435
rs151835	cg24982541	2.57506e-07	0.00134689	-0.00402025
rs1632988	cg10807461	2.64197e-07	0.00137705	-0.00130367
rs2859741	cg09363841	2.71988e-07	0.00141233	-0.00383141
rs3843376	cg12594803	2.73009e-07	0.00141638	-0.00335655
rs7622156	cg08276221	2.74053e-07	0.00142015	-0.00139375
rs11633294	cg13297560	2.74573e-07	0.00142248	0.00416245
rs17370615	cg22247277	2.77722e-07	0.00143595	-0.000307108
rs440597	cg22620746	2.83066e-07	0.00145803	0.00426147
rs2316131	cg05898907	2.88011e-07	0.00148142	-0.0033466
rs4286585	cg01790032	2.88931e-07	0.0014852	0.00126147
rs13292096	cg13736810	2.89306e-07	0.00148642	-0.00026561
rs3809109	cg10261205	2.95495e-07	0.00151275	0.00147045
rs17364223	cg06133097	2.97974e-07	0.00152409	0.00215088
rs1378472	cg19755714	2.988e-07	0.00152734	0.00140706
rs17370615	cg22041137	3.15237e-07	0.00160059	0.00493844
rs2219383	cg20694715	3.16309e-07	0.00160482	-0.000700881
rs4927848	cg04425270	3.17066e-07	0.00160805	0.00230274
rs10514710	cg26781129	3.20264e-07	0.00162113	0.00375247
rs17370615	cg13879875	3.22528e-07	0.00163	-0.000334124
rs3751497	cg23176270	3.30248e-07	0.00166379	0.000639709
rs7818308	cg12682382	3.31144e-07	0.00166768	-0.00454133
rs7738608	cg27395391	3.33314e-07	0.00167693	0.00225215
rs10773819	cg21833366	3.33773e-07	0.00167861	-0.00150293
rs2700844	cg20830867	3.41183e-07	0.00170947	0.00342792
rs6820570	cg21836699	3.42642e-07	0.00171571	-0.00395558
rs10874763	cg01538778	3.46591e-07	0.0017332	0.000303249
rs6425730	cg07478791	3.49086e-07	0.00174428	-0.00127477
rs2494462	cg07919760	3.56266e-07	0.00177312	-0.00328703
rs4799088	cg26740109	3.5811e-07	0.00178075	0.00353876
rs11084402	cg15916628	3.63221e-07	0.00180327	-0.00243747
rs12451009	cg00936449	3.65098e-07	0.00181125	-0.000371882
rs7832710	cg06435363	3.6583e-07	0.00181354	-0.00335673
rs6546923	cg02831290	3.65963e-07	0.00181398	-0.00203236
rs11099807	cg17479576	3.67947e-07	0.00182224	-0.00527261
rs11775658	ch.8.52117604R	3.69916e-07	0.00183064	0.00054313
rs2978339	cg21769514	3.76871e-07	0.00185775	0.00244373
rs560941	cg03957547	3.77725e-07	0.00186059	0.00188812
rs11653487	cg17542650	3.81411e-07	0.00187484	0.00262859
rs3131854	cg23912231	3.85797e-07	0.00189109	-0.0009337
rs532154	cg08723637	4.09338e-07	0.0019888	-0.00209999
rs2817110	cg01865606	4.18842e-07	0.00202763	-0.00031647
rs4692549	cg21613905	4.21149e-07	0.00203709	0.000256597
rs2683236	cg05624577	4.21722e-07	0.00203912	-0.00557915
rs17423255	cg23691223	4.23264e-07	0.00204461	-0.00269621
rs323406	cg08453903	4.26571e-07	0.00205812	0.00329102
rs567577	cg08353955	4.26983e-07	0.00205955	-0.000959018
rs2417280	cg14201929	4.41018e-07	0.00211766	-0.00529867
rs252564	cg26754472	4.42178e-07	0.00212248	-0.00292721
rs6585989	cg22674789	4.42935e-07	0.00212535	-0.00164444
rs1013841	cg01359822	4.46088e-07	0.00213895	0.00263142
rs1862485	cg23384886	4.50637e-07	0.00215742	-0.00146541
rs4841005	cg01774131	4.51399e-07	0.00216004	0.0022828
rs4727090	cg02826890	4.57194e-07	0.0021831	-0.00251473
rs4845624	cg06521149	4.59275e-07	0.00219095	0.00277627
rs2238630	cg16023110	4.61589e-07	0.00219938	0.00480962
rs1437683	cg11592631	4.68187e-07	0.00222502	0.00217166
rs11691523	cg11592631	2.39138e-06	0.00870261	-0.00251322
rs17784233	cg09719124	4.85859e-07	0.00229951	0.00153009
rs229522	cg20979921	5.01051e-07	0.00235902	0.00206079
rs9318552	cg20028827	5.01775e-07	0.00236178	0.00286393
rs9861999	cg16274205	5.0231e-07	0.00236402	0.00269491
rs756502	cg25157999	5.08941e-07	0.00238992	-0.00185446
rs478265	cg15983584	5.14137e-07	0.00241066	0.000467477
rs2004083	cg05998449	5.26512e-07	0.00245752	0.00507206
rs6650624	cg18008372	5.4225e-07	0.00252133	-0.00176067
rs3900981	cg02993606	5.43979e-07	0.00252791	0.00354878
rs12536631	cg11129772	5.61986e-07	0.00259898	-0.00325113
rs2172998	cg26999154	5.86169e-07	0.00269441	-0.00367767
rs4786303	cg11062956	5.8994e-07	0.00270834	0.00153349
rs6598448	cg26475500	5.91384e-07	0.00271373	0.00148158
rs151719	cg00119778	5.98322e-07	0.0027387	-0.00211196
rs6903608	cg00119778	1.37372e-05	0.0362871	-0.00185261
rs9389610	cg07185983	5.98674e-07	0.00273969	-0.0030921
rs2588512	cg12813441	6.0279e-07	0.00275695	0.00490222
rs6691100	cg25026456	6.04698e-07	0.00276348	-0.000409256
rs12885300	cg08183125	6.16358e-07	0.00281134	-0.00323585
rs9308363	cg09684264	6.29524e-07	0.00286263	-0.000842794
rs2306806	cg05850870	6.35459e-07	0.00288571	-0.00192249
rs12483496	cg04893913	6.40313e-07	0.00290316	0.000645181
rs2056892	cg20850984	6.43682e-07	0.0029161	-0.00223478
rs3212358	cg01023759	6.45497e-07	0.00292272	0.00312502
rs12925933	cg01023759	1.68072e-06	0.00649741	0.00319667
rs7146	cg27197643	6.4577e-07	0.00292363	-0.00202489
rs10862508	cg17391672	6.47156e-07	0.00292924	-0.00290617
rs4394377	cg21745092	6.50129e-07	0.00293972	-0.00266523
rs7251928	cg14245421	6.64906e-07	0.0029951	-0.00145266
rs7968375	cg06826457	6.66781e-07	0.00299985	0.00161126
rs12740505	cg23895273	6.67622e-07	0.00300196	-0.000464656
rs11165042	cg04831900	6.68496e-07	0.00300555	-0.00512574
rs7167899	cg25385940	6.68911e-07	0.00300708	-0.00358314
rs2816625	cg10792982	6.71014e-07	0.00301348	-0.0015883
rs11993244	cg01466164	6.75333e-07	0.00303053	-0.00362021
rs9515247	cg01593787	6.8281e-07	0.00305863	-0.0020112
rs766887	cg13485126	6.89103e-07	0.00308373	-0.00256938
rs10863213	cg07179078	6.89681e-07	0.00308563	-0.000718573
rs4713755	cg10661734	6.90914e-07	0.00308909	-0.000553819
rs7530362	cg26312149	7.04548e-07	0.00314271	0.0016345
rs960145	cg17707095	7.08239e-07	0.00315591	-0.00157403
rs174576	cg21116783	7.09929e-07	0.00316216	-0.000847327
rs1636249	cg15247329	7.17562e-07	0.00319156	0.0036102
rs4975593	cg08830157	7.22939e-07	0.00321016	0.00154062
rs6910071	cg09666540	7.45182e-07	0.00329077	0.000649609
rs308328	cg17066594	7.53543e-07	0.00332186	-0.00373006
rs888208	cg07382132	7.53897e-07	0.00332259	0.00202955
rs4861749	cg05693910	7.64285e-07	0.00336075	-0.00167945
rs6589426	cg24647015	7.68851e-07	0.00337788	0.00250386
rs1250126	cg12414557	7.77852e-07	0.00341072	0.0027904
rs3792511	cg08998950	7.77852e-07	0.00341072	0.00533491
rs1470211	cg08998950	1.19261e-05	0.032407	-0.0041014
rs4800192	cg20743280	7.85943e-07	0.00344319	-0.00110379
rs12866697	cg16275739	7.93296e-07	0.00347049	0.000409491
rs1530952	cg23897927	7.93938e-07	0.00347255	-0.00117273
rs42467	cg02251859	7.95601e-07	0.00347869	-0.00163166
rs9512468	cg03424663	8.02854e-07	0.00350545	0.00113006
rs12595195	cg02161701	8.08874e-07	0.00352676	-0.00316467
rs12883126	cg06835156	8.11322e-07	0.00353475	-0.00154116
rs1661068	cg02114288	8.17817e-07	0.00355843	-0.000398522
rs10408164	cg25773489	8.20261e-07	0.00356829	-0.00222795
rs6504833	cg25173405	8.22923e-07	0.0035778	-0.00267892
rs10838251	cg16977035	8.27484e-07	0.00359311	0.00182324
rs3766178	cg11964810	8.33906e-07	0.00361203	0.00181688
rs7547787	cg19912559	8.35791e-07	0.00361864	-0.00117864
rs17370615	cg26380756	8.52013e-07	0.00367661	-0.000158514
rs3782567	cg26955132	8.6593e-07	0.00372747	0.00264974
rs6801636	cg22831314	8.73259e-07	0.0037542	0.000980703
rs175057	cg15467112	8.77172e-07	0.00376861	0.00389204
rs4950524	cg13067553	8.85084e-07	0.00379534	-0.00235043
rs9341324	cg16292181	8.85092e-07	0.00379534	0.00432876
rs7898632	cg23823660	8.85824e-07	0.00379767	0.00202752
rs161936	cg10652637	8.87721e-07	0.00380378	0.00131231
rs1431130	cg17546721	9.10455e-07	0.00389125	0.00410443
rs1611710	cg24389386	9.12113e-07	0.00389668	-0.00338036
rs9750503	cg10845886	9.17214e-07	0.0039157	-0.00110005
rs12678154	cg01876435	9.19557e-07	0.00392348	-0.00110824
rs11718498	cg12311082	9.24089e-07	0.00393697	-0.00256931
rs4077405	cg12085600	9.29218e-07	0.00395673	0.00325145
rs2238114	cg01097940	9.33823e-07	0.00397424	0.000700293
rs1542256	cg08993878	9.35996e-07	0.00398222	-0.00432755
rs11205435	cg25303772	9.37494e-07	0.00398817	-0.00100741
rs11838414	cg02874768	9.40375e-07	0.00399916	-0.0011876
rs3752109	cg22720790	9.54198e-07	0.00405067	-0.00322836
rs11255182	cg10983206	9.57115e-07	0.00406091	0.00237355
rs4294976	cg02844866	9.74693e-07	0.00412159	-0.0015868
rs9386898	cg02872426	9.79491e-07	0.0041397	-0.00286742
rs935480	cg04001941	1.00266e-06	0.004223	-0.0021269
rs9386891	cg23021340	1.01095e-06	0.0042539	-0.0029584
rs10848844	cg06922599	1.03235e-06	0.00432406	-0.00289641
rs10061901	cg26090469	1.04664e-06	0.00437209	-0.00165862
rs11097415	cg22395490	1.05115e-06	0.00438773	-0.000960065
rs624244	cg07537739	1.06597e-06	0.00444131	-0.000837349
rs2427457	cg17221813	1.0749e-06	0.00447388	0.00280142
rs11848785	ch.14.71061373R	1.07838e-06	0.00448445	-0.000653992
rs591283	cg04518186	1.11198e-06	0.00459967	-0.00216647
rs10514710	cg17279458	1.12819e-06	0.00465664	0.0041601
rs4851287	cg06150148	1.14205e-06	0.00470182	0.00345983
rs2843127	cg11669283	1.1498e-06	0.00472744	-0.00144074
rs411326	cg26793289	1.16066e-06	0.0047672	-0.000566848
rs1391520	cg22875332	1.16369e-06	0.00477724	-0.00273067
rs4486225	cg26388668	1.16761e-06	0.00478891	0.00254568
rs6960214	cg15041044	1.16902e-06	0.0047942	0.00506666
rs11259844	cg13259177	1.17071e-06	0.00479967	0.00197031
rs10000169	cg19162496	1.1923e-06	0.00487676	0.00297112
rs4949008	cg21662478	1.19513e-06	0.00488535	-0.00340646
rs4719841	cg10085138	1.20617e-06	0.004923	0.00225107
rs4372050	cg19009323	1.2093e-06	0.00493376	0.00162445
rs7101374	cg26198807	1.22955e-06	0.00500671	0.00305391
rs6459805	cg14178173	1.23174e-06	0.00501324	-0.00182526
rs925440	cg18132405	1.2326e-06	0.00501611	0.000956713
rs4790522	cg09697259	1.24217e-06	0.00504789	0.000867624
rs302615	cg02372613	1.25119e-06	0.0050779	-0.00150099
rs16826443	cg13149736	1.25335e-06	0.00508462	0.00183973
rs164861	cg02306798	1.27049e-06	0.00514378	0.00132985
rs2084637	cg21585512	1.27149e-06	0.00514625	-0.00195317
rs4239638	cg24125901	1.27364e-06	0.00515393	0.00266768
rs2181443	cg03448754	1.27453e-06	0.00515635	0.00426761
rs4852033	cg05570654	1.32383e-06	0.00532438	-0.00166921
rs7220116	cg00348244	1.3378e-06	0.00537305	0.00403645
rs10265417	cg01224451	1.34319e-06	0.0053893	-0.00122284
rs1946053	cg20751398	1.34522e-06	0.00539637	0.00141
rs2096066	cg05977156	1.34852e-06	0.005408	-0.00171378
rs4802210	cg23489630	1.35658e-06	0.00543112	0.00348923
rs2414161	cg22715398	1.35686e-06	0.0054317	-0.00430974
rs12538839	cg21361702	1.36075e-06	0.00544185	-0.000173796
rs6699898	cg22502715	1.36817e-06	0.005465	-0.00276555
rs6577046	cg17689702	1.36975e-06	0.00546971	-0.00117154
rs266858	cg13537487	1.37674e-06	0.00549271	-0.00130428
rs8057431	cg02844852	1.3808e-06	0.00550507	-0.00174286
rs3845358	cg08146483	1.38226e-06	0.0055098	0.00208291
rs11050339	cg16818056	1.39648e-06	0.00555658	-0.00182526
rs6798742	cg09006292	1.39882e-06	0.00556481	-0.0037037
rs2042381	cg09750775	1.40228e-06	0.00557659	0.000434816
rs1374021	cg07784793	1.40599e-06	0.00558727	-0.00169623
rs1105489	cg05767404	1.43086e-06	0.00567016	-0.00223234
rs3847985	cg17090968	1.43679e-06	0.00569112	0.000821016
rs6779465	cg15346242	1.44825e-06	0.00572691	-0.00257499
rs1415214	cg13682187	1.45439e-06	0.00574779	0.00400703
rs9482	cg24367957	1.46369e-06	0.00578001	-0.00470142
rs10914746	cg14037114	1.47595e-06	0.00582157	0.00228713
rs12797899	cg08561079	1.50047e-06	0.00590324	-0.00356914
rs3901356	cg04839616	1.51726e-06	0.00595941	-0.000878678
rs2941504	cg05616858	1.52762e-06	0.00599369	0.00379575
rs731953	cg19495351	1.53123e-06	0.00600254	0.0038562
rs12048904	cg15686842	1.55336e-06	0.00607568	-0.00071524
rs11080562	cg07836661	1.57699e-06	0.00615562	-0.000101987
rs6502057	cg21880101	1.6266e-06	0.00632162	0.00168369
rs835334	cg04682580	1.62731e-06	0.00632376	-0.00319115
rs12312710	cg10358780	1.62896e-06	0.00632954	-0.000455151
rs2300211	cg10358780	3.66461e-06	0.0123663	-0.000355042
rs3823934	cg03456212	1.63578e-06	0.00634993	0.00065977
rs6781013	cg12362118	1.64118e-06	0.00636719	-0.00292909
rs1348563	cg24326782	1.66567e-06	0.00644852	0.00288632
rs227708	cg24806663	1.67287e-06	0.00647266	-0.00101277
rs12745769	cg12075498	1.6757e-06	0.00648077	0.00308965
rs1605389	cg22588275	1.6909e-06	0.00653114	0.00140934
rs1531540	cg03127127	1.715e-06	0.00660141	-0.000289305
rs6559754	cg14139511	1.72365e-06	0.00662963	0.000312612
rs868624	cg07367144	1.72612e-06	0.00663722	0.00407576
rs12676956	cg14696926	1.7442e-06	0.00669714	-0.00346153
rs10213659	cg24814707	1.75301e-06	0.00672455	-0.00504793
rs851980	cg18745416	1.76226e-06	0.0067549	-0.00379379
rs6838393	cg19113954	1.77322e-06	0.00678686	-0.00305745
rs1152966	cg23541923	1.77629e-06	0.00679703	0.00253803
rs10207490	cg26638266	1.794e-06	0.00685566	0.00245568
rs1655296	cg04892437	1.79417e-06	0.00685566	-0.00456024
rs13015810	cg08471173	1.79677e-06	0.00686364	-0.00178234
rs2069126	cg19695842	1.83908e-06	0.00699077	-0.000758422
rs5014622	cg15101392	1.86236e-06	0.00706488	-0.0020743
rs11188513	cg18054998	1.87155e-06	0.00709275	0.000964802
rs33013	cg04186980	1.87785e-06	0.00711194	-0.0014562
rs11249756	cg00636942	1.88102e-06	0.00712058	-0.000755416
rs853774	cg04202267	1.89363e-06	0.00715622	0.00216363
rs6467854	cg23387468	1.89593e-06	0.00716355	-0.00422455
rs10514853	cg24994504	1.91246e-06	0.00721924	0.00126629
rs1933488	cg06080941	1.92839e-06	0.00727117	-0.0023675
rs17370615	cg01008680	1.93053e-06	0.00727859	0.00213534
rs1465852	cg02134022	1.93766e-06	0.00730272	0.0013498
rs4539564	cg00079375	1.98401e-06	0.00744792	0.000890964
rs944963	cg14737286	2.01855e-06	0.00755872	0.000933344
rs9834762	cg22156128	2.02042e-06	0.00756453	0.00352351
rs12979689	cg18225577	2.02331e-06	0.00757274	-0.00415199
rs1076188	cg24987604	2.02342e-06	0.00757274	-0.00106385
rs162562	cg02355081	2.0256e-06	0.00757947	-0.00550772
rs3112362	cg10624823	2.02775e-06	0.00758543	-0.001287
rs1878759	cg23510089	2.02942e-06	0.00759095	0.00372639
rs4938028	cg27289463	2.03126e-06	0.00759641	-0.00299499
rs1561843	cg05726764	2.03235e-06	0.00759837	0.00370684
rs2387422	cg19384448	2.045e-06	0.0076393	-0.00426532
rs11160134	cg10340801	2.05728e-06	0.00767662	0.0017464
rs3745920	cg21278102	2.05822e-06	0.00767811	-0.00125318
rs875741	cg25131818	2.05825e-06	0.00767811	0.000291309
rs7870809	cg00121158	2.06935e-06	0.00771429	0.00026481
rs8044982	cg02036364	2.07331e-06	0.00772341	-0.00209231
rs162562	cg19269093	2.08809e-06	0.00776853	-0.00392064
rs6119628	cg03833512	2.11715e-06	0.00786284	-0.00153601
rs4881399	cg06279296	2.18045e-06	0.00806815	0.00324686
rs7633305	cg02748582	2.19032e-06	0.00809724	-0.000995885
rs4948393	cg00510507	2.21556e-06	0.00817849	0.00195266
rs7120548	cg10504702	2.22204e-06	0.00819792	0.000263807
rs4453265	cg19700658	2.22385e-06	0.00820008	0.0014802
rs1275925	cg22284448	2.23787e-06	0.00824421	0.00309691
rs12089989	cg26891210	2.25902e-06	0.00830769	-0.00299623
rs7118634	cg02474625	2.27002e-06	0.00833974	0.00220743
rs7896093	cg06395652	2.27593e-06	0.0083569	-0.00213277
rs10161263	cg11887234	2.30903e-06	0.00845838	0.00177679
rs1603389	cg10486069	2.31684e-06	0.00848286	-0.00437645
rs2452	cg15098255	2.32295e-06	0.00850161	0.00344513
rs6573020	cg18427465	2.33964e-06	0.00854951	0.00279912
rs159853	cg27655214	2.3493e-06	0.00857777	0.00205124
rs1181876	cg13558682	2.35664e-06	0.00859912	0.00166543
rs287533	cg22797297	2.36321e-06	0.00861919	0.00441852
rs11723316	cg17985608	2.3786e-06	0.00866355	-0.00061125
rs877110	cg16138602	2.41265e-06	0.00876219	0.00211199
rs12452527	cg20130018	2.41909e-06	0.00878082	0.00123194
rs6994715	cg12847125	2.42083e-06	0.00878554	0.000320069
rs1492489	cg12462883	2.42879e-06	0.00880807	0.00235914
rs8108434	cg20624953	2.47355e-06	0.0089422	-0.00244648
rs2241820	cg24896860	2.47976e-06	0.00896061	0.00040743
rs3791426	cg14550559	2.52649e-06	0.00910037	0.00306281
rs187411	cg22771603	2.54915e-06	0.00916283	-0.000155712
rs2282367	cg09936400	2.5603e-06	0.00919798	0.0017041
rs4727160	cg05532669	2.57992e-06	0.00925846	-0.000368104
rs942876	cg20365566	2.58015e-06	0.00925846	-0.0015857
rs9261743	cg13903409	2.58702e-06	0.00927574	0.000431856
rs10494316	cg17134153	2.59632e-06	0.00930329	-0.00199555
rs12879663	cg04245961	2.59896e-06	0.00930945	-0.000940272
rs1105489	cg27573991	2.59896e-06	0.00930945	-0.00256144
rs1036385	cg04035553	2.6026e-06	0.00932163	0.00161057
rs12501769	cg27207756	2.60871e-06	0.00933936	0.0027308
rs3806113	cg08135965	2.63307e-06	0.00940902	0.000214021
rs4873809	cg07777042	2.65429e-06	0.00947809	-0.00168684
rs4802562	cg10667338	2.66077e-06	0.00949869	0.00187599
rs9892880	cg25364619	2.666e-06	0.00951146	0.00278552
rs6445860	cg23029041	2.67194e-06	0.0095259	-0.0030388
rs10494316	cg14833337	2.71288e-06	0.00965391	-0.00160079
rs2788865	cg25524530	2.72559e-06	0.00969095	0.000152058
rs6578213	cg12667933	2.73481e-06	0.00971821	-0.0025043
rs6785366	cg01438868	2.74225e-06	0.0097386	-0.0044853
rs4908874	cg06348737	2.79154e-06	0.00989008	0.00131711
rs4301800	cg17586880	2.79811e-06	0.00990202	0.00112212
rs222851	cg14616648	2.82071e-06	0.00996887	0.000456314
rs3774729	cg16782675	2.82276e-06	0.00997523	-0.00552997
rs6577046	cg09244037	2.82779e-06	0.00999125	-0.00497735
rs1713976	cg03984758	2.8292e-06	0.00999536	-0.00204302
rs2049823	cg12638745	2.83396e-06	0.0100087	-0.003581
rs10516156	cg12648074	2.84965e-06	0.0100552	-0.00189134
rs6313	cg06020661	2.87835e-06	0.0101384	-0.00173657
rs903896	cg03315270	2.88753e-06	0.010164	0.00166499
rs4353229	cg24846397	2.91695e-06	0.0102585	0.00129442
rs2074445	cg24340285	2.93539e-06	0.0103072	0.00101487
rs1487753	cg12065800	2.93585e-06	0.0103074	-0.000884885
rs2856997	cg08905753	2.93946e-06	0.0103179	-0.00163697
rs7646083	cg06720722	2.96389e-06	0.0103864	0.00222881
rs162562	cg20629455	2.96413e-06	0.0103864	-0.00649524
rs584462	cg09189538	2.97759e-06	0.0104299	-0.00143131
rs7904413	cg15115171	2.98946e-06	0.0104614	0.00368526
rs241560	cg15946224	3.00006e-06	0.0104909	0.00163535
rs4379922	cg15282973	3.0427e-06	0.0106063	-0.00213792
rs7547408	cg06642677	3.04812e-06	0.0106214	-0.00137113
rs6881736	cg09441164	3.04984e-06	0.0106219	-0.00138493
rs11863903	cg04742550	3.07809e-06	0.0107037	-0.00106194
rs441827	cg24805411	3.08059e-06	0.0107114	-0.00163792
rs8105023	cg10393338	3.09746e-06	0.0107608	-0.000971153
rs9261484	cg11731221	3.1031e-06	0.0107795	0.00125854
rs4959352	cg14374089	3.14089e-06	0.0108882	0.00101277
rs3858703	cg07813377	3.14775e-06	0.0109072	-0.00181306
rs1952692	cg13745402	3.15132e-06	0.0109159	0.00165089
rs6806020	cg18348830	3.15964e-06	0.0109419	0.00135639
rs11718446	cg11279151	3.17548e-06	0.0109899	0.00533369
rs1578743	cg09072322	3.19957e-06	0.0110592	0.000568266
rs7939722	cg05448032	3.20076e-06	0.0110617	-0.00292709
rs7013424	cg26718357	3.20789e-06	0.0110832	0.00143085
rs2726588	cg06779553	3.27756e-06	0.0112822	-0.0032199
rs6537810	cg06789517	3.28687e-06	0.0113114	-0.00380656
rs983745	cg22161115	3.30287e-06	0.0113568	-0.00400336
rs4678090	cg00984696	3.30364e-06	0.0113584	0.00221983
rs6429800	cg21807065	3.31164e-06	0.0113801	0.00106949
rs2366818	cg19622777	3.32996e-06	0.0114274	0.00494336
rs4977303	cg13607993	3.34634e-06	0.0114755	-0.00458669
rs2242446	cg04811706	3.34676e-06	0.0114755	0.00180494
rs251373	cg01369220	3.35316e-06	0.0114933	-0.00357809
rs7798441	cg08311085	3.41042e-06	0.0116539	-0.0016995
rs7630511	cg16340446	3.41784e-06	0.0116763	0.000841781
rs11080562	cg18176922	3.43317e-06	0.0117216	-0.00010123
rs2999504	cg24630419	3.44236e-06	0.011751	-0.00153005
rs1330950	cg21727032	3.45267e-06	0.0117768	0.00154322
rs6577046	cg00035980	3.46546e-06	0.0118139	-0.00159262
rs1529835	cg24221919	3.47649e-06	0.0118454	-0.003433
rs1451327	cg05655457	3.49178e-06	0.0118899	0.00233833
rs17370615	cg19570171	3.49191e-06	0.0118899	-0.000218295
rs1454102	cg21667061	3.51802e-06	0.0119586	-0.00394473
rs880626	cg21667061	3.81348e-06	0.0127582	-0.00420833
rs10256396	cg22326328	3.52412e-06	0.0119763	-0.00353578
rs1904139	cg02291439	3.55719e-06	0.0120703	-0.00203163
rs872808	cg12091786	3.56431e-06	0.0120904	0.0018146
rs6456098	cg09340511	3.57462e-06	0.0121213	-0.00107005
rs9355025	cg16335098	3.58322e-06	0.0121474	-0.00293075
rs1534599	cg22365225	3.60901e-06	0.0122184	-0.00136682
rs472357	cg15064964	3.62163e-06	0.0122539	0.000981483
rs11688439	cg15930703	3.62313e-06	0.0122579	-0.00395986
rs2296337	cg04770660	3.63172e-06	0.0122814	0.0018939
rs10422527	cg23950597	3.64779e-06	0.0123268	0.000500239
rs17524318	cg07888040	3.65444e-06	0.0123432	-0.000890181
rs3735814	cg12395012	3.65721e-06	0.0123503	-0.00050706
rs9530617	cg24456639	3.67516e-06	0.0123995	-0.000658716
rs9409948	cg00445475	3.69406e-06	0.0124491	-0.00132737
rs11054914	cg25165382	3.69952e-06	0.012464	-0.000320932
rs2069347	cg08505883	3.70586e-06	0.012479	0.00318627
rs4148854	cg00092967	3.71012e-06	0.012488	0.000397931
rs2555036	cg24639100	3.7139e-06	0.0124957	0.00133818
rs10904820	cg02774632	3.73425e-06	0.0125474	0.00125856
rs9357447	cg08652108	3.76387e-06	0.0126258	0.000367755
rs2238069	cg16267263	3.7723e-06	0.0126467	0.00488077
rs6125111	cg16599045	3.77304e-06	0.0126481	0.0003569
rs475870	cg07231005	3.78752e-06	0.0126851	-0.00136987
rs9267947	cg17755604	3.78753e-06	0.0126851	0.0011367
rs7836805	cg26386464	3.82132e-06	0.0127785	0.000524816
rs951062	cg25401612	3.84951e-06	0.0128605	-0.00273895
rs10127656	cg26547924	3.85133e-06	0.0128655	0.000747898
rs12525163	cg08161546	3.85772e-06	0.0128837	-0.00314056
rs17370615	cg25142308	3.86735e-06	0.0129073	-0.0027039
rs2757594	cg02369313	3.87246e-06	0.0129215	0.000288638
rs1264569	cg19321263	3.87255e-06	0.0129215	0.00111409
rs4806767	cg25588792	3.87258e-06	0.0129215	0.00309388
rs1528041	cg08391852	3.89012e-06	0.0129736	-0.00355531
rs162562	cg26914927	3.92757e-06	0.0130725	-0.00553092
rs13174381	cg12951125	3.9321e-06	0.0130843	0.000522201
rs309872	cg26306052	3.94299e-06	0.0131162	-0.001444
rs11768083	cg02006203	3.98448e-06	0.0132283	0.000403575
rs1414681	cg26964636	4.01365e-06	0.0133106	-0.00230363
rs220346	cg26964636	5.43638e-06	0.0170895	0.00228345
rs3927465	cg23913077	4.06189e-06	0.013444	-0.00188517
rs10161263	cg01013630	4.06971e-06	0.0134662	0.00203631
rs158777	cg08434574	4.07029e-06	0.0134662	-0.00223291
rs11207332	cg07810476	4.07343e-06	0.013474	0.00351415
rs422951	cg19155735	4.08578e-06	0.0135108	-0.00184444
rs7546545	cg19924025	4.09027e-06	0.0135223	-0.000836932
rs6727435	cg22059413	4.10434e-06	0.0135633	-0.0024959
rs2107613	cg17046247	4.10937e-06	0.0135765	-0.00458869
rs10916	cg15112952	4.23e-06	0.0139089	0.00289151
rs132675	cg20337753	4.24864e-06	0.0139519	-0.000677923
rs6737256	cg20638140	4.25308e-06	0.0139631	-0.00208993
rs17370615	cg08371160	4.2992e-06	0.0140766	-0.000246785
rs10073556	cg27129755	4.30374e-06	0.0140892	0.00111045
rs980272	cg25428293	4.3126e-06	0.0141136	0.000391566
rs956730	cg16386158	4.31532e-06	0.0141189	-0.00278764
rs10944945	cg18090145	4.34215e-06	0.0141907	0.00371686
rs7804019	cg17614582	4.37854e-06	0.0142933	-0.001512
rs13354746	cg02573091	4.38917e-06	0.0143222	-0.00432991
rs10049588	cg03483035	4.42059e-06	0.0144072	-0.00254192
rs9267947	cg13400512	4.43469e-06	0.0144485	0.00221475
rs6953983	cg14719076	4.4438e-06	0.01447	-0.000647207
rs17370615	cg26530502	4.45829e-06	0.0145104	0.00219396
rs906148	cg10249074	4.47174e-06	0.0145492	-0.00457999
rs11595762	cg18593374	4.49042e-06	0.0145993	-0.00175349
rs4975684	cg14596589	4.54926e-06	0.0147584	-0.0020017
rs4599460	cg22368305	4.5609e-06	0.0147902	-0.00349819
rs2886070	cg22353551	4.5964e-06	0.0148827	-0.00143734
rs362249	cg00604193	4.62529e-06	0.0149701	-0.000794674
rs4397403	cg21471580	4.63031e-06	0.0149826	-0.00218375
rs3737973	cg13781805	4.67897e-06	0.0151081	-0.00136067
rs6965685	cg19584649	4.70588e-06	0.0151833	-0.00213303
rs7078219	cg10506844	4.71888e-06	0.0152155	-0.000505398
rs10495041	cg23663428	4.74774e-06	0.0152951	0.00119365
rs12373373	cg02694925	4.74982e-06	0.0153006	-0.000900654
rs11769313	cg06724108	4.75794e-06	0.0153194	0.000514816
rs1671035	cg13564933	4.75967e-06	0.0153235	0.000669772
rs2291258	cg02667335	4.78641e-06	0.0153925	0.000824767
rs10217064	cg26953954	4.78981e-06	0.0154022	-0.00444755
rs227859	cg07066907	4.79358e-06	0.0154131	0.00297785
rs12223186	cg09427644	4.81252e-06	0.0154654	-0.0023042
rs11209216	cg19865425	4.8729e-06	0.0156295	-0.00178185
rs311734	cg08049640	4.87659e-06	0.0156388	-0.00177412
rs7247108	cg25619184	4.88088e-06	0.0156488	-0.000568689
rs2290608	cg25381017	4.89879e-06	0.0156937	-0.00308859
rs398739	cg01258201	4.93341e-06	0.0157896	0.00122351
rs11729056	cg03244277	4.93878e-06	0.015803	-0.00294905
rs540524	cg06269299	4.9592e-06	0.0158582	-0.00104731
rs2415020	cg08872353	4.97687e-06	0.0159021	-0.00222112
rs12104272	cg18745184	5.04392e-06	0.0160819	-0.000181167
rs4849030	cg17762554	5.09387e-06	0.0162129	0.00288821
rs6426629	cg27395190	5.13206e-06	0.0163125	-8.04124e-05
rs2876257	cg08821937	5.13315e-06	0.0163147	-0.00456187
rs11062613	cg17043230	5.13685e-06	0.0163226	-0.00248585
rs4268437	cg04718304	5.17317e-06	0.0164108	-0.00225769
rs7935184	cg16836250	5.17446e-06	0.0164136	0.00327009
rs1144815	cg23226914	5.19195e-06	0.0164522	-0.00260822
rs887466	cg18969004	5.23505e-06	0.0165627	-0.00320139
rs13101730	cg25614364	5.26077e-06	0.0166284	0.00196307
rs2270541	cg01101782	5.26444e-06	0.0166374	0.00448213
rs8115229	cg18949315	5.26962e-06	0.0166498	0.00314235
rs7919591	cg04827919	5.27936e-06	0.0166753	-0.0010997
rs8042384	cg25904166	5.2803e-06	0.016677	0.00151156
rs2107613	cg06081750	5.29385e-06	0.0167132	-0.0027889
rs1243039	cg26877588	5.30497e-06	0.0167404	-0.00491251
rs2075748	cg18158015	5.3059e-06	0.0167421	-0.00521327
rs1127299	cg02947862	5.37226e-06	0.0169236	0.00248091
rs3094165	cg24900542	5.38088e-06	0.0169415	-0.00182614
rs11766378	cg09991587	5.3982e-06	0.0169854	0.00101224
rs640098	cg08458745	5.40344e-06	0.0169979	0.00147931
rs4716598	cg04804604	5.41186e-06	0.0170217	0.00269682
rs11930623	cg18085176	5.41859e-06	0.0170375	-0.00243582
rs12357460	cg14930471	5.4449e-06	0.0171096	-0.00127505
rs420897	cg13739485	5.45926e-06	0.0171453	-0.00146793
rs9450701	cg26132665	5.48006e-06	0.0171986	0.00101722
rs10874468	cg15600915	5.51028e-06	0.0172778	0.00344541
rs516761	cg10626792	5.53551e-06	0.0173334	-0.00116753
rs896946	cg10810860	5.55699e-06	0.0173925	0.0003779
rs4492784	cg26622537	5.56972e-06	0.0174283	0.00326335
rs7931399	cg26622537	7.65813e-06	0.0226112	0.00345128
rs2703510	cg06789856	5.61098e-06	0.0175329	0.00177155
rs3824897	cg26834418	5.61801e-06	0.0175507	-0.00286887
rs9343974	cg16253997	5.62229e-06	0.0175614	0.000390687
rs11655031	cg21855910	5.62925e-06	0.0175804	-0.00163551
rs17370615	cg07985315	5.64763e-06	0.0176269	-0.00052528
rs9088	cg13459303	5.65569e-06	0.017649	0.00147301
rs301624	cg03738718	5.66812e-06	0.0176816	0.0014194
rs729032	cg21752578	5.67882e-06	0.0177091	-0.0015259
rs642495	cg04420335	5.68453e-06	0.0177242	-0.00182118
rs6137005	cg12237948	5.68581e-06	0.0177254	0.00315452
rs12855239	cg14118175	5.73092e-06	0.0178467	0.0023245
rs3745450	cg27055083	5.76011e-06	0.0179251	0.00169799
rs4676503	cg07405330	5.81845e-06	0.0180759	-0.0018155
rs2535327	cg23142900	5.82519e-06	0.0180941	0.000205045
rs1470590	cg23427406	5.82522e-06	0.0180941	-0.00166539
rs6105921	cg15347961	5.83057e-06	0.018108	0.000185276
rs11185717	cg13587564	5.83981e-06	0.0181336	-0.00122049
rs2024585	cg18189591	5.85959e-06	0.0181827	-0.00272083
rs4670876	cg01412379	5.89941e-06	0.0182837	0.0011406
rs2356437	cg08684893	5.94541e-06	0.0184022	-0.00236066
rs2819096	cg25562619	5.94964e-06	0.0184124	0.0009156
rs11022589	cg27075800	5.9649e-06	0.0184469	-0.000912227
rs6878606	cg06974592	5.9765e-06	0.0184771	-0.00259442
rs6577046	cg16919971	5.98444e-06	0.0184943	-0.00383079
rs8066620	cg03255749	5.98482e-06	0.0184943	0.00142231
rs8128050	cg22851299	6.00856e-06	0.0185576	-0.0019305
rs7718298	cg14758163	6.02384e-06	0.0185891	0.00187436
rs1532472	cg16638769	6.02814e-06	0.0185961	-0.000985095
rs2352930	cg16638769	7.71507e-06	0.0227509	-0.00106712
rs897604	cg18489755	6.0308e-06	0.0186003	-0.00185957
rs11101558	cg00857536	6.11455e-06	0.0188097	-0.00190719
rs7970893	cg00851732	6.13822e-06	0.0188698	0.0022058
rs10110073	cg22273804	6.15014e-06	0.0188949	0.00115589
rs1362104	cg21401263	6.15071e-06	0.0188952	-0.00038436
rs17370615	cg20012172	6.18533e-06	0.0189885	-0.000348842
rs6472207	cg11183445	6.18582e-06	0.0189885	0.000928935
rs4799838	cg22707085	6.20485e-06	0.0190284	0.000582601
rs6061373	cg01526189	6.23674e-06	0.0191053	0.00136322
rs210134	cg07519485	6.24569e-06	0.0191242	-0.0018283
rs10495703	cg08123321	6.26428e-06	0.0191775	-0.00112202
rs10217074	cg13021857	6.26454e-06	0.0191775	-0.00266171
rs1802295	cg05532178	6.28305e-06	0.0192225	0.000686849
rs17241282	cg17360854	6.29115e-06	0.0192397	-0.00149004
rs295129	cg06226703	6.32026e-06	0.0193172	-0.0014389
rs561261	cg11601913	6.35133e-06	0.019396	-0.000685189
rs1568903	cg26132900	6.35882e-06	0.0194159	0.00201556
rs2749592	cg19127909	6.36246e-06	0.0194227	0.000948702
rs12166894	cg09246833	6.36401e-06	0.0194259	0.000590926
rs244853	cg05256481	6.40033e-06	0.0195175	0.00113295
rs1154386	cg23223755	6.43174e-06	0.0195984	0.00439558
rs169737	cg26074430	6.4838e-06	0.0197391	0.00103032
rs241561	cg14459059	6.49772e-06	0.0197763	0.00251092
rs1563863	cg08373605	6.5085e-06	0.0198038	-0.0023331
rs211455	cg02452416	6.52003e-06	0.0198314	0.000592897
rs2654189	cg15834952	6.52074e-06	0.0198321	-0.00234037
rs5766105	cg03779241	6.53247e-06	0.0198617	0.000445308
rs317616	cg26059219	6.54209e-06	0.0198877	0.000220789
rs931728	cg05175964	6.55716e-06	0.0199203	0.00172348
rs4832972	cg24826020	6.5669e-06	0.0199468	0.0018966
rs1344126	cg22589728	6.63411e-06	0.0201221	0.00270284
rs12538839	cg18155226	6.63525e-06	0.0201221	-0.000210605
rs11922435	cg08875947	6.65057e-06	0.0201629	-0.00445624
rs2395162	cg21293943	6.67783e-06	0.0202319	0.000713834
rs6499882	cg01104250	6.67941e-06	0.0202321	-0.00276994
rs1887063	cg10198565	6.70223e-06	0.0202844	-0.00423291
rs1288369	cg11950754	6.70872e-06	0.0202977	-0.00149855
rs1997502	cg05874806	6.71218e-06	0.0203038	0.00170985
rs3091242	cg26216857	6.72489e-06	0.0203346	-0.00112837
rs17815421	cg18708744	6.73064e-06	0.0203474	-0.000696937
rs9960934	cg20506037	6.73612e-06	0.020361	0.00137824
rs1547629	cg13456106	6.73816e-06	0.0203656	-0.000381436
rs4792953	cg01612247	6.74521e-06	0.0203838	0.00141681
rs2241883	cg01403320	6.76361e-06	0.0204333	0.00142694
rs2294394	cg04932691	6.77777e-06	0.0204745	0.00131191
rs9787011	cg15522984	6.7853e-06	0.0204927	0.000330486
rs12142130	cg13216303	6.78748e-06	0.0204977	-0.00027412
rs509063	cg01753270	6.79657e-06	0.0205221	-0.00419044
rs243034	cg08426369	6.83658e-06	0.0206228	-0.00144076
rs2837291	cg08795360	6.8515e-06	0.0206585	0.00146958
rs2567506	cg27492584	6.88807e-06	0.020747	-0.00123809
rs1327369	cg13845049	6.90142e-06	0.0207841	-0.000666178
rs849885	cg18966495	6.91022e-06	0.0208059	-0.0029665
rs1899039	cg02552189	6.91665e-06	0.0208222	0.00421784
rs322812	cg08242859	6.93001e-06	0.020855	-0.00198278
rs17282181	cg14750757	6.9439e-06	0.0208917	0.00157891
rs2124147	cg01753140	6.96756e-06	0.0209519	-0.00191174
rs10508076	cg23809442	6.99896e-06	0.0210353	0.000787708
rs196325	cg06765389	7.01833e-06	0.0210841	-0.000660344
rs17370615	cg16269048	7.04272e-06	0.0211542	-0.0015715
rs2119479	cg04052832	7.04528e-06	0.0211569	0.00130017
rs10083027	cg15085883	7.0457e-06	0.0211569	-0.00275117
rs28370418	cg17270519	7.05117e-06	0.0211701	-0.00181381
rs2072026	cg15500907	7.07098e-06	0.0212233	-0.00263882
rs3734287	cg15500907	1.63273e-05	0.0415761	0.00259058
rs10161263	cg20592186	7.09631e-06	0.0212898	0.00203633
rs7702150	cg14576733	7.10389e-06	0.0213038	-0.0011238
rs2021788	cg05955436	7.13083e-06	0.0213663	0.00202485
rs17224695	cg08875094	7.15e-06	0.021411	0.00115032
rs4839748	cg08875094	1.22864e-05	0.033209	0.000964157
rs6798742	cg15342441	7.15715e-06	0.021426	-0.0044617
rs4889425	cg10409860	7.17629e-06	0.0214752	-0.000850575
rs1711479	cg09197761	7.20836e-06	0.0215568	-0.00283634
rs6491232	cg07306605	7.22052e-06	0.0215884	0.00113292
rs28688444	cg26065836	7.23381e-06	0.0216233	0.00479273
rs4878112	cg13985445	7.2692e-06	0.0217051	0.00261051
rs4872137	cg00472375	7.27353e-06	0.0217146	-0.000428729
rs919740	cg13897374	7.29169e-06	0.0217543	0.00172303
rs17289394	cg09394608	7.2972e-06	0.021768	0.00201637
rs4891826	cg26848442	7.30751e-06	0.0217934	-0.00275369
rs7808471	cg16770546	7.31779e-06	0.0218192	0.00159415
rs10481157	cg16228380	7.33233e-06	0.0218529	-0.00256906
rs11665996	cg09686308	7.34803e-06	0.0218851	0.00239912
rs2537777	cg18075287	7.37854e-06	0.0219597	-0.00126546
rs11080562	cg00145489	7.38889e-06	0.0219856	-0.000108613
rs7625947	cg22012981	7.41413e-06	0.0220509	0.00170149
rs4905783	cg15963095	7.43042e-06	0.0220831	-0.00139088
rs7909299	cg26603656	7.4449e-06	0.0221196	0.000581505
rs462769	cg02291561	7.45682e-06	0.0221451	0.000572006
rs1123571	cg13804377	7.45765e-06	0.0221451	-0.00163082
rs10518234	cg05522011	7.45791e-06	0.0221451	0.00130735
rs11670533	cg26851661	7.47958e-06	0.0221929	0.00153547
rs2583435	cg26073542	7.48988e-06	0.0222106	-0.00163752
rs1856765	cg02221622	7.50759e-06	0.0222556	0.00233864
rs4752541	cg08899523	7.51372e-06	0.0222698	-0.00183152
rs17370615	cg21053015	7.51429e-06	0.0222698	-0.000626003
rs1474464	cg06866553	7.51841e-06	0.0222755	0.00182622
rs957404	cg01272393	7.52823e-06	0.0222965	-0.00101637
rs267916	ch.1.3571010R	7.57726e-06	0.0224185	0.00270606
rs311734	cg26480745	7.60307e-06	0.02248	-0.00214719
rs2688492	cg18535702	7.61911e-06	0.0225165	0.00193544
rs7132154	cg26268125	7.61989e-06	0.0225165	0.00577563
rs2030793	cg03830093	7.64631e-06	0.0225796	-0.00146828
rs3779149	cg17588800	7.66405e-06	0.022627	0.00129861
rs4340170	cg12020676	7.66483e-06	0.0226276	0.00141153
rs1181876	cg26810690	7.68548e-06	0.0226803	0.00118504
rs2899485	ch.15.663480R	7.81442e-06	0.0229883	-0.00241004
rs191996	cg03294207	7.81847e-06	0.0229978	-0.000885899
rs10161263	cg15844785	7.83262e-06	0.0230334	0.00179155
rs4674908	cg00392155	7.84634e-06	0.0230654	0.0014724
rs11263687	cg20587188	7.85489e-06	0.0230871	-0.0036305
rs4244341	cg04215703	7.86277e-06	0.0231086	0.00068873
rs1874790	cg09167705	7.89997e-06	0.023201	0.00139204
rs285696	cg13613853	7.94593e-06	0.0233206	-0.000417515
rs9536335	ch.13.52878677F	7.96188e-06	0.0233572	-0.00311995
rs4848725	cg14937492	8.00645e-06	0.023464	0.000497591
rs442203	cg03515980	8.01149e-06	0.0234771	0.000991011
rs7989816	cg12418762	8.02089e-06	0.0234978	-0.00150008
rs411326	cg08590186	8.04953e-06	0.0235577	-0.000892337
rs10932228	cg19154323	8.08327e-06	0.0236434	-0.00328663
rs2861911	cg13391675	8.08351e-06	0.0236434	0.00296306
rs309539	cg21787873	8.10333e-06	0.0236927	0.00285864
rs4963361	cg15581842	8.10774e-06	0.0236995	-0.00040028
rs6482743	cg03271907	8.14766e-06	0.0237908	0.000727189
rs4957114	cg26070865	8.14823e-06	0.0237908	0.00127895
rs7225574	cg04886672	8.14829e-06	0.0237908	0.00151767
rs13249752	cg02919422	8.14972e-06	0.0237921	-0.00160544
rs11948648	cg25942450	8.1905e-06	0.0238852	-0.00157123
rs766778	cg08350549	8.19768e-06	0.0239044	-0.00328022
rs7833494	cg04153489	8.20187e-06	0.0239131	0.00141455
rs10875612	cg00055771	8.22467e-06	0.023964	0.0015964
rs639847	cg09809672	8.26636e-06	0.024068	0.00192034
rs6429541	cg00162064	8.27973e-06	0.0241017	0.00170162
rs10161263	cg20622834	8.29366e-06	0.0241388	0.00135229
rs10890160	cg06885757	8.31443e-06	0.0241887	-0.00198746
rs1782838	cg06173682	8.32494e-06	0.0242158	0.00108022
rs4656206	cg15897921	8.33702e-06	0.0242457	-0.00318139
rs1887063	cg11120874	8.35815e-06	0.0242948	-0.00402221
rs882610	cg24447095	8.38195e-06	0.0243429	0.000983937
rs689902	cg24786174	8.39586e-06	0.024378	0.00144325
rs2269165	cg22624212	8.40828e-06	0.0244123	0.00031026
rs2146662	cg07071379	8.42876e-06	0.0244665	0.00157496
rs6930713	cg21368479	8.47055e-06	0.0245719	-0.00103146
rs9332466	cg10864200	8.50494e-06	0.0246379	0.0043481
rs7376288	cg10864200	1.81004e-05	0.0450878	-0.00396443
rs5600	cg08788055	8.52315e-06	0.02468	-0.00155301
rs1931745	cg01039092	8.5307e-06	0.0246947	-0.00125154
rs7711188	cg07228402	8.59474e-06	0.0248319	0.00399439
rs4353357	cg12485044	8.59545e-06	0.0248321	0.00495757
rs4546483	cg02123262	8.60508e-06	0.0248546	0.00273623
rs2921722	cg16462462	8.60916e-06	0.0248646	-0.00101559
rs1894406	cg24594224	8.61247e-06	0.0248706	-0.00150941
rs7746692	cg09094473	8.6605e-06	0.0249896	-0.00221623
rs17201317	ch.8.104563527R	8.66572e-06	0.0249993	-0.0032659
rs2741108	cg07662864	8.66867e-06	0.0250049	-0.000822722
rs2221867	cg05293365	8.69383e-06	0.025066	0.000410319
rs9591989	cg10550033	8.74479e-06	0.0252021	0.00156293
rs10455270	cg17840539	8.76295e-06	0.025249	-0.00106612
rs12412313	cg05714496	8.78921e-06	0.025312	0.00197858
rs8069477	cg02954676	8.81486e-06	0.0253717	-0.000742516
rs13018263	cg04744156	8.82913e-06	0.0254033	-0.00100659
rs4239638	cg01539269	8.83266e-06	0.0254098	0.00212104
rs4984943	cg10179297	8.88773e-06	0.0255481	-0.0024728
rs6953261	cg01196268	8.89631e-06	0.0255692	-0.000897819
rs6457110	cg04983903	8.9515e-06	0.0256966	0.00122753
rs1239334	cg23516451	8.96273e-06	0.0257215	-0.00155415
rs4501547	cg12750031	8.966e-06	0.025729	-0.00122819
rs2853668	cg07855874	8.98089e-06	0.0257681	0.00153671
rs740237	cg06983765	9.01499e-06	0.0258567	-0.00123936
rs2209957	cg23540651	9.07172e-06	0.0259926	-0.00106943
rs4131885	cg26837192	9.099e-06	0.0260504	-0.00266332
rs7778237	cg00347863	9.12021e-06	0.0261008	0.00245064
rs885267	cg17102495	9.13324e-06	0.0261326	-0.00173798
rs6707140	cg07780694	9.13436e-06	0.0261339	0.000361831
rs3812831	cg22926686	9.15349e-06	0.026183	0.00122812
rs1051219	cg09861496	9.16336e-06	0.0262057	0.00122003
rs2076594	cg06746829	9.165e-06	0.0262085	-0.00258373
rs3212198	cg19717150	9.1662e-06	0.0262101	0.00242921
rs1108755	cg23952644	9.17114e-06	0.0262205	-0.00087899
rs394199	cg22812331	9.19086e-06	0.0262638	-0.0033533
rs112314	cg26900259	9.19976e-06	0.0262836	0.000493629
rs6780013	cg27129171	9.23319e-06	0.0263623	-0.000158144
rs1830651	cg07582845	9.23566e-06	0.0263659	-0.000238123
rs2283492	cg02562761	9.26384e-06	0.0264282	-0.00217217
rs2498399	cg15969227	9.26999e-06	0.026443	-0.00438927
rs7622156	cg02700130	9.29124e-06	0.0264867	-0.00137392
rs6869702	cg08711547	9.33972e-06	0.0266079	-0.000242485
rs10076494	cg22807585	9.34999e-06	0.0266272	-0.00215424
rs2294478	cg12110846	9.35337e-06	0.0266318	-0.00094277
rs738222	cg14466896	9.36547e-06	0.0266587	-0.000382524
rs1293764	cg23736843	9.36841e-06	0.0266651	0.000757673
rs1043845	cg12806892	9.38735e-06	0.026712	0.00259221
rs12523505	cg25557227	9.3895e-06	0.0267138	-0.00399117
rs10823627	cg09140723	9.3981e-06	0.0267345	-0.00304575
rs200447	cg25370592	9.46871e-06	0.0268898	-0.000246391
rs1465522	cg02647406	9.47202e-06	0.0268973	-0.0013026
rs646464	cg02531227	9.57209e-06	0.0271489	0.00425695
rs2562350	cg25333395	9.59095e-06	0.0271947	-0.00223001
rs12591842	cg25887394	9.64652e-06	0.0273118	0.00167819
rs1799722	cg01050076	9.65697e-06	0.0273222	0.00107776
rs8105250	cg03344031	9.65919e-06	0.0273266	-0.00428747
rs1496726	cg08104146	9.69139e-06	0.0273984	-0.00456363
rs2589133	cg20758492	9.71941e-06	0.027466	-0.00113981
rs4075205	cg00624939	9.72536e-06	0.0274804	0.00133295
rs12498348	cg19453997	9.76981e-06	0.0275852	0.00225597
rs9591989	cg19640779	9.79723e-06	0.0276491	0.00216578
rs12446238	cg04010817	9.82863e-06	0.027728	0.00428158
rs2073900	cg11806945	9.85688e-06	0.0278028	0.00084423
rs4628217	cg23122650	9.86093e-06	0.0278093	0.00401712
rs10818651	cg21469772	9.86437e-06	0.0278151	-0.00167713
rs6593807	cg22001782	9.86784e-06	0.0278171	-0.0018196
rs4714696	cg10049156	9.87365e-06	0.0278316	-0.00462635
rs12453746	cg20942162	9.87657e-06	0.027835	-0.00321039
rs411326	cg27253757	9.88273e-06	0.0278493	-0.00092724
rs12585725	cg07726423	9.90102e-06	0.0278883	-0.00170703
rs1888057	cg05116906	9.91824e-06	0.0279142	0.000454509
rs7835769	cg24546463	9.92675e-06	0.0279343	-0.00150371
rs480575	cg04464122	9.99202e-06	0.0280865	-0.00274287
rs2420946	cg15049101	1.00511e-05	0.0282265	0.00215557
rs7894492	cg07356745	1.00837e-05	0.0283028	-0.00329147
rs2419629	cg03254336	1.0109e-05	0.0283598	0.0020249
rs139410	cg25632672	1.01314e-05	0.0284109	-7.90723e-05
rs4802602	cg13429145	1.0155e-05	0.0284672	-0.00153578
rs2969114	cg00090309	1.01604e-05	0.0284801	0.00216114
rs6801636	cg22114979	1.02331e-05	0.0286482	0.00323511
rs4839154	cg19518695	1.02408e-05	0.0286636	-0.00524887
rs757454	cg03583050	1.02522e-05	0.0286876	0.000765177
rs4624755	cg07752409	1.02724e-05	0.0287341	-0.00167641
rs357922	cg13807496	1.0298e-05	0.0287997	-0.00117055
rs11750173	cg18856388	1.03226e-05	0.0288577	-0.00103566
rs2054608	cg26965236	1.03488e-05	0.0289178	-0.00420448
rs2983478	cg14536194	1.03642e-05	0.0289548	0.00288181
rs326057	cg10800865	1.03651e-05	0.0289553	0.000917008
rs10775247	cg25009366	1.03819e-05	0.028994	-0.00229924
rs3765736	cg07045089	1.04218e-05	0.0290854	-0.00254511
rs1108889	cg11878867	1.04305e-05	0.0291055	-0.00184953
rs11718446	cg21474964	1.04393e-05	0.0291201	-0.00245534
rs1867828	cg00714464	1.04404e-05	0.0291211	-0.0013379
rs1160305	cg24723561	1.04695e-05	0.0291857	-0.00223363
rs10910288	cg24723561	1.31521e-05	0.0350614	-0.00235612
rs10161263	cg12411309	1.05718e-05	0.029406	0.0011491
rs9349417	cg20172563	1.0601e-05	0.029475	-0.00201798
rs4128236	cg11607648	1.06407e-05	0.0295691	-0.00324599
rs10957373	cg10895168	1.06818e-05	0.0296549	0.00126428
rs9928856	cg10047845	1.07155e-05	0.0297257	0.00255376
rs7214541	cg06219337	1.07438e-05	0.0297878	-0.00178591
rs2071556	cg09017117	1.07753e-05	0.0298565	-0.00299514
rs1922139	ch.10.1148322F	1.08446e-05	0.0300115	0.00241688
rs11591441	cg25949033	1.08494e-05	0.0300205	-0.000415723
rs1340376	cg04043334	1.09743e-05	0.0303099	0.00314437
rs262453	cg05914894	1.09954e-05	0.030362	-0.00129898
rs4773319	cg19199483	1.10558e-05	0.0304867	-0.000223403
rs4887111	cg04865220	1.10596e-05	0.0304951	0.000818937
rs1541066	cg04189665	1.10921e-05	0.0305763	-0.00233639
rs12221204	cg18758405	1.10937e-05	0.0305787	-0.0034273
rs10799662	cg14656657	1.11093e-05	0.0306072	0.00107221
rs10160382	cg20000464	1.11251e-05	0.0306444	-0.00383986
rs9921147	cg27585878	1.12134e-05	0.0308539	-0.000912882
rs4711209	cg00599564	1.12179e-05	0.0308599	0.00131352
rs666688	cg00258779	1.1248e-05	0.0309327	0.000852682
rs11855722	cg01695279	1.12482e-05	0.0309327	0.00272552
rs2366144	cg17708016	1.12766e-05	0.0309938	-0.000803409
rs7999481	cg10246520	1.12886e-05	0.0310225	0.000771214
rs7751642	cg05371064	1.13463e-05	0.0311512	-0.0017514
rs1959121	cg22542859	1.14268e-05	0.0313297	-0.00119313
rs4927602	cg20971474	1.14327e-05	0.0313435	-0.00293914
rs4444401	cg09473315	1.15082e-05	0.031527	-0.00205547
rs2621373	cg21171279	1.15107e-05	0.0315317	-0.00101153
rs3995498	cg04276894	1.15318e-05	0.0315808	-0.00155261
rs10752609	cg10317026	1.1553e-05	0.031624	0.000541585
rs11078449	cg02228185	1.15649e-05	0.0316479	-0.00387008
rs11851031	cg15457718	1.15772e-05	0.0316643	0.00438275
rs2375015	cg21167558	1.1587e-05	0.0316761	0.00098354
rs2724506	cg14143723	1.1613e-05	0.0317384	0.0034317
rs7945105	cg14488962	1.16284e-05	0.0317719	-0.00169993
rs6668857	cg02068538	1.16496e-05	0.0318234	0.00124379
rs849063	cg20899053	1.16629e-05	0.0318531	-0.000740498
rs12487529	cg20035362	1.17154e-05	0.031977	0.00408038
rs4949632	cg21867608	1.17399e-05	0.0320286	-0.00244265
rs1543901	cg01308258	1.17595e-05	0.0320674	-0.00102749
rs551673	cg06236987	1.17959e-05	0.0321228	0.000850005
rs4768698	cg21428710	1.18378e-05	0.0322127	-0.0022861
rs11198425	cg25043986	1.18583e-05	0.0322621	-0.00231911
rs6758173	cg14017402	1.18701e-05	0.0322876	-0.00191391
rs9276913	cg11615303	1.18815e-05	0.0323076	0.000270138
rs4366552	cg07347128	1.1902e-05	0.0323568	0.00362681
rs7146	cg06547984	1.19103e-05	0.0323774	-0.00197029
rs10037969	cg05912079	1.1923e-05	0.0324013	0.002452
rs2526098	cg23580662	1.1935e-05	0.0324291	0.00242608
rs10838502	cg22287492	1.19404e-05	0.0324417	-0.0016317
rs7220116	cg20663846	1.19956e-05	0.032576	0.0039939
rs1528041	cg01806261	1.20538e-05	0.0327099	-0.00384576
rs8061995	cg04531202	1.20643e-05	0.0327282	-9.92297e-05
rs2267780	ch.16.9751610F	1.20769e-05	0.0327484	0.000399939
rs4473785	cg15140258	1.20804e-05	0.0327557	0.00131815
rs3135123	cg19739468	1.20941e-05	0.0327884	-0.00181773
rs12490985	cg24494008	1.2096e-05	0.0327912	-0.00166592
rs401592	cg21512564	1.21485e-05	0.0329092	-0.00377102
rs3130696	cg09556042	1.21938e-05	0.0330118	-0.00313151
rs6828137	cg07409292	1.21954e-05	0.0330139	0.000408423
rs4905528	cg06562570	1.22356e-05	0.0331052	-0.000235565
rs4380275	cg24104387	1.22437e-05	0.0331226	0.00360126
rs6800812	cg07263372	1.22516e-05	0.0331371	-0.00145467
rs1036821	cg05838357	1.22541e-05	0.0331396	-0.00067317
rs11846699	cg19586116	1.22731e-05	0.0331758	-0.000548614
rs4684230	cg18038544	1.24787e-05	0.0336045	0.00321685
rs2078535	cg07956515	1.24963e-05	0.0336386	0.000913264
rs1416764	cg00871019	1.25625e-05	0.0337671	0.000828854
rs9415986	cg04161859	1.25692e-05	0.0337828	0.00163707
rs3850947	cg15414132	1.25777e-05	0.033799	0.000806554
rs828884	cg06226156	1.26571e-05	0.0339624	-0.000983212
rs2283088	cg04386614	1.27541e-05	0.0341908	0.00261192
rs902968	cg02637843	1.27611e-05	0.0342048	0.00106387
rs3130014	cg01680268	1.27682e-05	0.0342193	-0.00119568
rs294308	cg02914097	1.27769e-05	0.0342381	0.00169898
rs647727	cg00735218	1.28141e-05	0.0343173	-0.0022234
rs1092688	cg15027563	1.28299e-05	0.0343503	0.000446119
rs4599460	cg06277849	1.28371e-05	0.0343673	0.0022178
rs460126	cg14545975	1.28472e-05	0.03439	0.00141348
rs330941	cg05460571	1.28482e-05	0.0343902	-0.00160108
rs420897	cg14012599	1.29007e-05	0.0345102	-0.000974685
rs2278872	cg12036365	1.29467e-05	0.0346082	-0.000696452
rs2135787	cg24705426	1.29504e-05	0.0346156	-0.00265456
rs4854164	cg14356272	1.30179e-05	0.0347681	-0.000534169
rs4383344	cg25101327	1.3027e-05	0.0347878	0.000900887
rs1169307	cg00949670	1.3029e-05	0.0347909	0.000246892
rs12984214	cg23024448	1.30421e-05	0.0348212	0.00130519
rs1823874	cg17886038	1.30731e-05	0.0348899	-0.00025416
rs2876257	cg09152866	1.3075e-05	0.0348899	-0.00329247
rs2673164	cg23238677	1.30754e-05	0.0348899	0.00322314
rs6508055	cg03255741	1.3137e-05	0.035026	-0.000299794
rs6552864	cg03080336	1.31719e-05	0.0351073	0.00120906
rs10805262	cg10231500	1.3174e-05	0.0351103	-0.00392365
rs7115477	cg03268737	1.31748e-05	0.0351103	-0.00299097
rs1926317	cg07537530	1.31882e-05	0.0351404	0.00140818
rs7311526	cg03723284	1.3189e-05	0.0351404	-0.000696296
rs952608	cg23246666	1.33062e-05	0.0353948	-0.000850873
rs17730621	cg21159940	1.33271e-05	0.0354458	0.00141588
rs11986537	cg00401433	1.33587e-05	0.0355042	0.00298422
rs1123862	cg02258920	1.33665e-05	0.0355224	0.00157998
rs2076530	cg22425813	1.33856e-05	0.0355683	-0.00143567
rs927203	cg06974143	1.33958e-05	0.0355932	0.00105653
rs2075863	cg21115691	1.34024e-05	0.0356048	-0.000250685
rs11724172	cg16865618	1.34215e-05	0.0356461	0.000908238
rs4789817	cg11712217	1.34316e-05	0.0356649	0.00046366
rs17681051	cg24451141	1.34398e-05	0.0356796	0.000703571
rs12004	cg03929205	1.34463e-05	0.0356945	-0.000382115
rs11084882	cg20083497	1.34892e-05	0.0357801	-0.00138408
rs1621308	cg06559576	1.35654e-05	0.0359466	0.00431869
rs2030534	cg22990726	1.35665e-05	0.035947	-0.0011843
rs6576736	cg22488158	1.35722e-05	0.035957	-0.00232624
rs4689074	cg04283838	1.35961e-05	0.0360038	-0.000702932
rs4889242	cg07602072	1.36264e-05	0.036056	0.00161336
rs7838717	cg15151778	1.36316e-05	0.0360674	-0.000494504
rs11074601	cg11470399	1.36397e-05	0.0360865	-0.000408973
rs6923005	cg25133685	1.36492e-05	0.0361069	-0.00369766
rs2107613	cg17421331	1.36511e-05	0.0361095	-0.00239221
rs3851114	cg05471009	1.36653e-05	0.0361381	-0.00123876
rs17395160	cg01517571	1.3692e-05	0.0361891	0.0049781
rs2181839	cg00142036	1.3698e-05	0.0361979	0.00232481
rs9927552	cg02521665	1.37037e-05	0.0362104	0.000812229
rs11836262	cg05648964	1.37314e-05	0.0362755	0.00330317
rs11135762	cg03330710	1.37407e-05	0.0362915	-0.00103104
rs4247362	cg07840332	1.37661e-05	0.0363508	0.00200154
rs7703230	cg00594167	1.37737e-05	0.0363599	0.00121542
rs149425	cg27595489	1.37951e-05	0.0363918	-0.00470308
rs4956405	ch.4.2608081R	1.37954e-05	0.0363918	0.00235604
rs17690703	cg19832721	1.38116e-05	0.0364309	-0.00319505
rs7467137	cg01403030	1.3855e-05	0.0365384	-0.00308093
rs162562	cg15293422	1.38676e-05	0.0365669	-0.00430389
rs4614	cg01985660	1.38976e-05	0.0366411	-0.00140798
rs11735307	cg17127235	1.39043e-05	0.0366539	0.00156971
rs4663532	cg25591888	1.3918e-05	0.0366829	0.00176255
rs2253801	cg18389931	1.40113e-05	0.0368708	0.00132072
rs1105451	cg25810247	1.40312e-05	0.0369086	0.00295304
rs6459338	cg14558358	1.40472e-05	0.0369484	-0.000990358
rs4697244	cg03271761	1.40914e-05	0.0370307	0.00226756
rs7325678	cg05157360	1.41199e-05	0.0370814	-0.00239635
rs1829989	cg08296556	1.41856e-05	0.037208	-0.000162604
rs4674039	cg02794963	1.42048e-05	0.0372486	0.0035546
rs4485088	cg05817758	1.42115e-05	0.0372613	0.00107908
rs2868932	cg19853194	1.42364e-05	0.0373094	-0.000465752
rs632678	cg18098053	1.42914e-05	0.0374292	0.0044633
rs6825	cg05043794	1.42924e-05	0.0374295	-0.00204017
rs12610538	cg21051454	1.43371e-05	0.0375341	-0.000441887
rs803441	cg17140133	1.43903e-05	0.0376385	-0.000440481
rs4676870	cg20852250	1.44516e-05	0.0377455	-0.00210492
rs6844238	cg05264454	1.45182e-05	0.0378827	0.000189325
rs469053	cg01806427	1.45382e-05	0.0379176	0.00148722
rs8071251	cg19828416	1.45793e-05	0.0380071	-0.00257378
rs6860842	cg06844454	1.45839e-05	0.0380146	0.00113681
rs17469209	cg12048341	1.46103e-05	0.0380712	0.00487619
rs11231286	cg13273340	1.46203e-05	0.0380874	-0.0018469
rs7585314	cg14261272	1.46256e-05	0.0380938	-0.00134278
rs843522	cg11488033	1.46552e-05	0.0381584	-0.0023263
rs2035481	cg08822215	1.46974e-05	0.038251	-0.00202012
rs2910200	cg19619065	1.47021e-05	0.0382609	0.00134922
rs2077847	cg13995568	1.47587e-05	0.0383594	0.00110715
rs1181876	cg06543160	1.47662e-05	0.0383705	0.00183751
rs4699913	cg10938600	1.47879e-05	0.0384169	0.00259608
rs952037	cg03825010	1.48154e-05	0.0384735	0.000561115
rs12637098	cg21023926	1.48191e-05	0.0384783	-0.0017746
rs904017	cg05412333	1.48475e-05	0.0385375	-0.0010504
rs2241407	cg05017226	1.49382e-05	0.0387233	-0.00073928
rs585991	cg04088773	1.49644e-05	0.0387729	-0.000586716
rs2896452	cg00994649	1.49957e-05	0.038832	-0.00211432
rs9550221	cg10167785	1.50174e-05	0.038872	0.00186098
rs9860870	cg00323305	1.51003e-05	0.0390221	-0.00110297
rs4321739	cg23520478	1.51124e-05	0.0390457	-0.00310491
rs4917386	cg09541379	1.51224e-05	0.0390642	0.000431108
rs2241820	cg16474117	1.51735e-05	0.0391711	0.000849561
rs10933553	cg19125081	1.5224e-05	0.0392722	-0.00127686
rs10848315	cg21344159	1.52538e-05	0.0393279	0.00191656
rs7132674	cg21747310	1.53166e-05	0.0394746	-0.00188105
rs9871274	cg23727321	1.53597e-05	0.039578	-0.000639721
rs1075708	cg27232569	1.53741e-05	0.0396099	-0.00169574
rs9550221	cg10208284	1.53931e-05	0.0396514	0.00140404
rs1860741	cg26407811	1.54872e-05	0.0398675	0.00127573
rs1390679	cg03108697	1.55226e-05	0.0399417	-0.00461219
rs13016705	cg20196537	1.55227e-05	0.0399417	-0.00203562
rs9859134	cg16236146	1.55556e-05	0.0400136	-0.00161297
rs1737481	cg22372668	1.55678e-05	0.0400349	-0.00232169
rs3115570	cg24283019	1.55854e-05	0.0400698	0.000850244
rs2298466	cg10892972	1.55973e-05	0.0400952	-0.00204178
rs9845648	cg17495555	1.56281e-05	0.0401668	-0.00236654
rs9267947	cg13036593	1.56313e-05	0.0401724	0.000502962
rs2450203	cg20039163	1.56327e-05	0.0401734	-0.000902012
rs1711960	cg19899882	1.56425e-05	0.040196	-0.00054971
rs160730	cg00621247	1.56721e-05	0.040254	-0.00154804
rs12538839	cg11790979	1.56792e-05	0.0402672	-0.000194946
rs5007254	cg03295274	1.56932e-05	0.040298	0.00405844
rs2458634	cg04291888	1.56942e-05	0.0402981	0.000810039
rs5751341	cg20727362	1.57389e-05	0.0403843	-0.00127136
rs6798742	cg27516221	1.57489e-05	0.0404023	-0.00436112
rs7296736	cg27577720	1.57534e-05	0.0404113	-0.00242115
rs10849582	cg19471399	1.57721e-05	0.0404491	-0.00251542
rs8069699	cg21576525	1.58054e-05	0.0405085	-0.00182035
rs880275	cg01296593	1.58104e-05	0.0405187	0.00137618
rs276947	cg01296593	1.83989e-05	0.0456344	-0.00130961
rs17370615	cg12836643	1.58119e-05	0.0405201	0.00121357
rs6090223	cg00377953	1.58403e-05	0.0405824	0.00165143
rs17135019	cg07044458	1.5912e-05	0.0407428	0.00169025
rs8007000	cg16995290	1.59174e-05	0.040754	0.00022601
rs630145	cg12927990	1.59473e-05	0.0408202	-0.000728423
rs35217608	cg11118615	1.59651e-05	0.0408527	-0.00183924
rs1521886	cg10781510	1.59661e-05	0.0408527	-0.000423931
rs12474421	cg10781510	1.89456e-05	0.0467268	0.000464868
rs9268220	cg14493742	1.59752e-05	0.0408708	-0.00190602
rs1869417	cg23855901	1.59809e-05	0.0408804	-0.00145413
rs4796491	cg25288085	1.60085e-05	0.04093	-0.00306706
rs7256180	cg12014333	1.60313e-05	0.0409676	-0.00150096
rs11240465	cg24713653	1.60674e-05	0.0410493	-0.000584329
rs990794	cg20802333	1.60806e-05	0.0410753	-0.00518536
rs11080562	cg26185079	1.6103e-05	0.0411248	0.00204111
rs4540292	cg04230397	1.61107e-05	0.041141	0.00183878
rs13152324	cg16607898	1.61467e-05	0.0412126	0.00182294
rs468828	cg06976144	1.61646e-05	0.0412428	-0.00291187
rs13102358	cg19390329	1.61901e-05	0.0413	-0.000652085
rs3129690	cg08996678	1.62013e-05	0.041326	-0.00173749
rs11726392	cg19852958	1.62061e-05	0.0413356	-0.00156503
rs12887146	cg09339394	1.6227e-05	0.0413784	-9.61644e-05
rs12022162	cg06884882	1.62436e-05	0.0414075	-0.00168095
rs2883369	cg01173332	1.63287e-05	0.0415771	0.00191379
rs6734792	cg02444987	1.6337e-05	0.041593	0.000814358
rs3925081	cg02944871	1.63511e-05	0.0416233	0.002879
rs603645	cg05953285	1.6357e-05	0.0416281	0.00231166
rs1149602	cg03991848	1.64096e-05	0.0417434	0.000632347
rs6091808	cg08927738	1.64425e-05	0.0418192	-0.00359331
rs11136442	cg05873604	1.64541e-05	0.0418423	0.00161584
rs622064	cg16126671	1.64834e-05	0.0418994	0.00524852
rs12126555	cg03513464	1.65059e-05	0.0419513	-0.00191435
rs11598702	cg00035347	1.6522e-05	0.0419816	-0.00286591
rs7184123	cg07289133	1.65307e-05	0.0419984	0.0013314
rs12331100	cg06623474	1.6578e-05	0.0420946	-0.0043454
rs4921401	cg06907391	1.65886e-05	0.0421136	0.00114609
rs956958	cg20443778	1.66682e-05	0.0422863	0.00130259
rs10793068	cg23327896	1.6674e-05	0.0422957	-0.00173604
rs17023204	cg19856241	1.66794e-05	0.0423069	-0.00206244
rs4246316	cg10504066	1.67055e-05	0.0423517	-0.00142356
rs1608849	cg17545933	1.67255e-05	0.0423997	-0.000863865
rs11783368	cg17963840	1.6771e-05	0.042491	-0.00160803
rs4593926	cg18048370	1.67854e-05	0.0425166	0.00177907
rs1133104	cg26340084	1.68122e-05	0.0425766	-0.000354542
rs887911	cg22995176	1.68405e-05	0.0426375	0.00412932
rs7315020	cg06495803	1.68459e-05	0.0426483	0.00254624
rs6801636	cg20378687	1.68796e-05	0.0427257	0.00226082
rs2483616	cg04834966	1.69172e-05	0.0427967	-0.00190884
rs7643746	cg07216436	1.69463e-05	0.0428567	0.00233687
rs3935366	cg22360678	1.6948e-05	0.0428584	-0.000967733
rs13228646	cg03781084	1.69577e-05	0.0428776	0.000762281
rs11559856	cg05852143	1.69624e-05	0.0428839	-0.000560357
rs4643485	cg00630775	1.6984e-05	0.042917	0.00140708
rs3130931	cg08309069	1.70085e-05	0.0429682	-0.00337179
rs6502762	cg21533971	1.70198e-05	0.0429913	0.001621
rs2069590	cg12118371	1.70867e-05	0.0431116	0.00231982
rs17578859	cg13832045	1.71276e-05	0.0431958	-0.000284382
rs10878247	cg01603095	1.7138e-05	0.0432159	-0.00129132
rs10837407	cg04803994	1.71401e-05	0.0432166	-0.000942131
rs2800266	cg21179305	1.71462e-05	0.0432293	-0.00126724
rs7535375	cg13677741	1.71841e-05	0.0433085	0.00157148
rs2018310	cg10803098	1.72066e-05	0.043357	-0.00149627
rs2946662	cg27192248	1.72123e-05	0.0433688	-0.00225697
rs12187674	cg08934869	1.72603e-05	0.0434625	-0.00162717
rs9591989	cg09959790	1.7268e-05	0.0434764	0.00207404
rs449250	cg21932983	1.72992e-05	0.0435413	-0.00137112
rs1577274	cg06481887	1.73219e-05	0.043588	0.00166273
rs7068336	cg19894382	1.73498e-05	0.0436413	0.00111255
rs1406275	cg06746492	1.73548e-05	0.0436511	0.00416206
rs4968093	cg15660573	1.7525e-05	0.0439968	-0.0015212
rs843720	cg13006717	1.75669e-05	0.0440801	0.00315503
rs3129223	cg17877920	1.75702e-05	0.0440822	-0.00323183
rs1235043	cg00866814	1.76328e-05	0.044206	-0.000785968
rs2245830	cg20917943	1.76336e-05	0.044206	0.00151968
rs12187674	cg05479462	1.76564e-05	0.0442469	-0.00243479
rs734693	cg11948301	1.76565e-05	0.0442469	-0.00108497
rs6891672	cg15221739	1.7664e-05	0.044263	-0.00236025
rs2224391	cg09085698	1.7696e-05	0.0443214	0.000323855
rs11924708	cg27418402	1.77013e-05	0.0443214	0.0015835
rs599190	cg07781399	1.77345e-05	0.0443678	0.00158343
rs394199	cg11279454	1.77365e-05	0.0443699	-0.00318851
rs4757292	cg02907374	1.77955e-05	0.0444871	-0.00151574
rs1127299	cg12885302	1.78608e-05	0.0446183	0.00245281
rs529191	cg07187103	1.78701e-05	0.0446339	-0.000180996
rs9750952	cg06609498	1.78713e-05	0.0446339	-0.00107982
rs4802841	cg21111812	1.78935e-05	0.0446712	-0.000680884
rs6964	cg14517359	1.79072e-05	0.0446942	-0.00125183
rs1528041	cg03187411	1.79849e-05	0.0448491	-0.00259355
rs6583069	cg10536901	1.801e-05	0.0449007	-0.000921003
rs2766581	cg15921239	1.802e-05	0.0449172	0.00170753
rs2730265	cg24883441	1.80739e-05	0.0450322	0.00142149
rs4263662	cg25845323	1.81098e-05	0.0451049	0.00040453
rs4507587	cg13644645	1.81197e-05	0.0451266	-0.0011972
rs397425	cg13033072	1.81297e-05	0.045132	-0.00102021
rs10508884	cg12793525	1.81669e-05	0.0452106	-0.00173272
rs8060506	cg08466740	1.82305e-05	0.0453297	-0.00399487
rs9934223	cg05515034	1.82397e-05	0.0453498	0.0007081
rs751729	cg01532284	1.82581e-05	0.0453871	0.00134432
rs2694403	cg02490189	1.82798e-05	0.04543	-0.00130076
rs2289863	cg25976451	1.83163e-05	0.0454923	-0.00158275
rs2922188	cg27440834	1.8327e-05	0.0455049	-0.00179327
rs10784885	cg24373760	1.83555e-05	0.0455562	-0.000247558
rs1011659	cg18338925	1.84205e-05	0.0456724	-0.00512603
rs2341242	cg13180105	1.84632e-05	0.0457668	0.00158193
rs746731	cg09887862	1.84924e-05	0.0458289	-0.00352629
rs10839595	cg04997812	1.8494e-05	0.0458291	-0.00121073
rs2926362	cg27012908	1.85002e-05	0.0458388	0.00112249
rs6578213	cg06447952	1.85058e-05	0.045847	-0.00278692
rs10490158	cg22641430	1.85733e-05	0.0459851	-0.000518815
rs6730025	cg10981275	1.85899e-05	0.0460157	-0.000916205
rs280224	cg15328328	1.86383e-05	0.0461186	-0.00097686
rs2832144	cg24753998	1.86625e-05	0.0461672	0.00275781
rs1152653	cg11254426	1.86993e-05	0.0462426	-0.00217782
rs464918	cg12331505	1.87231e-05	0.0462943	-0.00168733
rs9382445	cg22753888	1.8725e-05	0.0462946	0.00375311
rs4804633	cg26558790	1.87595e-05	0.046367	-0.000115005
rs1388070	cg14225926	1.8828e-05	0.0464964	0.000757949
rs3799380	cg14345882	1.88725e-05	0.0465834	0.00162371
rs7559733	cg04943225	1.88812e-05	0.0465993	0.00126454
rs3819309	cg02945266	1.88972e-05	0.0466302	-0.00418302
rs1425446	cg20910361	1.89082e-05	0.0466487	-0.00488067
rs870034	cg20734030	1.89295e-05	0.0466926	0.00440132
rs11869096	cg13732302	1.89428e-05	0.0467225	-0.00193802
rs9864383	cg26315918	1.89568e-05	0.0467377	-0.00191089
rs2447027	cg25045228	1.89645e-05	0.0467502	-0.00177606
rs1727530	cg19911257	1.90001e-05	0.0468238	-0.00291086
rs11072793	cg16406281	1.90356e-05	0.0468884	-0.00201692
rs11074601	cg09977031	1.91143e-05	0.047013	-0.000440336
rs4321739	cg13926347	1.91257e-05	0.0470303	-0.00292071
rs2238630	cg13634151	1.91584e-05	0.0470754	-0.000561513
rs7922014	cg11438428	1.922e-05	0.0471938	0.00119328
rs9893732	cg11465466	1.9222e-05	0.0471944	-0.00188111
rs6780013	cg13052625	1.92262e-05	0.047199	0.00284144
rs9577454	cg07026882	1.9236e-05	0.0472142	0.000866353
rs10140359	cg13020868	1.92434e-05	0.0472285	-0.00388976
rs1896890	cg13583523	1.92844e-05	0.0473042	0.00215536
rs4783968	cg09223516	1.92913e-05	0.0473153	0.000522921
rs10000869	cg26741686	1.93446e-05	0.0474086	0.00311978
rs7603623	cg09294347	1.93581e-05	0.0474359	-0.00184581
rs10894124	cg14219124	1.93715e-05	0.0474629	-0.00154864
rs9634171	cg10452542	1.9391e-05	0.0475049	0.00154048
rs2238630	cg04257377	1.94599e-05	0.0476592	0.00155183
rs1362006	cg14733103	1.9482e-05	0.047696	0.00323167
rs2214569	cg00901138	1.94868e-05	0.047703	-0.00313091
rs12187268	cg18652453	1.95475e-05	0.047822	-0.000391782
rs2819513	cg08111158	1.95833e-05	0.0478829	0.002093
rs1979680	cg11155735	1.96254e-05	0.0479594	-0.0029738
rs268691	cg07743231	1.96483e-05	0.0480038	0.00246837
rs6089848	cg13768360	1.96749e-05	0.0480551	0.00158169
rs707312	cg22080027	1.96877e-05	0.0480768	0.00263328
rs6959747	cg08164617	1.97714e-05	0.0482458	0.000555829
rs2073741	cg26646411	1.97927e-05	0.0482892	-0.00245674
rs4902672	cg15364504	1.98314e-05	0.0483661	0.00151121
rs17183896	cg15557457	1.98419e-05	0.0483888	0.00379953
rs2270360	cg10165071	1.99903e-05	0.048668	-0.001547
rs134821	cg05248804	2.00588e-05	0.0488023	0.000834714
rs2497585	cg01708427	2.00704e-05	0.0488216	0.00290585
rs12873113	cg03427330	2.00721e-05	0.0488228	-0.00185426
rs2735076	cg19199204	2.01435e-05	0.048964	0.00318837
rs3117035	cg10537192	2.01846e-05	0.049049	0.00186237
rs1718969	cg17892629	2.02225e-05	0.0491352	-0.00287134
rs6606873	cg01334824	2.02497e-05	0.0491805	-0.00157375
rs1181876	cg06180630	2.02697e-05	0.0492182	0.00103313
rs9925126	cg04029168	2.03186e-05	0.0493091	0.000974011
rs210152	cg16562445	2.0397e-05	0.0494606	-0.000842738
rs11241198	cg07249274	2.04289e-05	0.0495171	0.000270505
rs1906404	cg07579107	2.05051e-05	0.0496687	-0.00362852
rs6578213	cg14780482	2.05153e-05	0.0496816	-0.000942748
rs7210851	cg02893619	2.05445e-05	0.0497225	-0.00113329
rs7113533	cg26247064	2.0608e-05	0.0498641	0.00385354
rs4321739	cg01779903	2.06176e-05	0.0498824	0.00282468
rs10997716	cg27125304	2.06318e-05	0.0499096	0.00493742
rs1182865	cg02611419	2.06544e-05	0.0499464	-0.000599315

## Sheet: Table S3
Table S3 - replication of cis slope QTLs with cell count corrected beta values
Table of the lead SNP CpG pairs for each independent cis slope-QTL uncovered in the LBC cohort.
The P-value of the association and effect size as change in slope per allele are given for both direct cell count and Houseman cell count estimate corrected Beta values
			Direct cell count corrected		Houseman cell estimate corrected
SNP ID	CpG probe ID	P-value	P-value	Effect size	P-value	Effect size
rs639216	cg20485607	1.37e-56	4.04601e-55	0.0514835	3.40541e-57	0.0507747
rs7102510	cg15696309	3.79e-42	9.39209e-42	0.0543169	2.9847e-43	0.0525553
rs2580765	cg09592903	4.39e-42	5.09269e-43	-0.0538381	1.35882e-44	-0.0532304
rs7219318	cg11949518	6.75e-42	3.04913e-41	0.0470947	4.70227e-40	0.0470581
rs7464436	cg09584650	4.29e-34	8.6341e-34	-0.0470076	4.36027e-38	-0.0504159
rs9972206	cg02291164	1.9e-33	4.25638e-32	-0.037164	1.87192e-35	-0.0386553
rs708727	cg07167872	7.92e-33	7.80226e-33	-0.0404396	4.15316e-32	-0.0401944
rs9376628	cg15052665	3.79e-31	3.01608e-31	-0.0362156	2.02325e-28	-0.0342905
rs12745508	cg00112952	5.81e-31	1.80799e-30	-0.0462967	1.07514e-37	-0.0488526
rs555097	cg15971518	5.93e-31	2.22723e-30	-0.0324014	4.47645e-32	-0.0322825
rs2420936	cg16273546	1.31e-27	4.48491e-27	0.0348661	3.32425e-27	0.0336784
rs13391356	cg07618928	4.67e-26	2.93799e-25	0.0224324	1.33703e-27	0.0226289
rs4045957	cg17920646	1.05e-24	1.06536e-23	-0.0377975	7.46887e-25	-0.0390459
rs11711054	cg07743747	3.18e-23	4.58498e-22	-0.0308664	2.03678e-23	-0.0308724
rs10896825	cg09235983	8.78e-23	7.43169e-23	-0.0339307	1.37e-24	-0.0332677
rs283025	cg14503564	1.03e-22	3.14549e-23	0.023208	1.04434e-21	0.0230024
rs4924785	cg19949948	1.97e-22	7.8247e-22	0.0312846	7.88702e-22	0.0308737
rs2535392	cg26371957	6.4e-22	2.28808e-20	0.0343811	8.25505e-22	0.0349546
rs1471132	cg26371957	8.3e-18	4.75487e-17	-0.0312919	5.20579e-18	-0.0317063
rs1034250	cg04798314	1.55e-21	3.54464e-23	-0.03544	2.12289e-20	-0.0324106
rs4654274	cg04798314	7.52e-17	1.022e-17	0.0362116	1.3837e-17	0.0349282
rs9266825	cg12182649	3.12e-21	1.2938e-21	-0.0374271	1.18833e-23	-0.0353728
rs10935002	cg04947385	5.91e-21	1.83362e-22	0.037177	5.78138e-21	0.0344088
rs7590255	cg23497611	1.24e-20	2.888e-18	0.0387968	2.32687e-19	0.035681
rs9326078	cg22082780	1.92e-19	1.93046e-20	-0.0280215	2.13284e-17	-0.0254378
rs10083027	cg11799593	3.22e-19	4.20768e-18	-0.0241089	4.23289e-22	-0.026785
rs2077670	cg17584477	3.31e-19	2.13288e-18	-0.0271219	5.62188e-23	-0.0271395
rs208104	cg14844989	4.38e-19	8.75956e-18	-0.0206397	3.56909e-17	-0.0207882
rs6770142	cg01292810	4.73e-18	6.54982e-17	-0.0219958	1.07353e-19	-0.0234512
rs6743832	cg21819782	6e-18	1.12606e-17	-0.0319217	3.18195e-23	-0.0352117
rs10207932	cg16163168	6.47e-18	3.78803e-15	0.0299865	1.20438e-14	0.0293158
rs3757316	cg17179660	7.15e-18	7.35281e-16	0.0178898	1.09736e-16	0.018364
rs1056522	cg18664965	1.02e-17	3.17783e-17	-0.0286187	1.34244e-19	-0.0300546
rs4045957	cg24536782	1.42e-17	1.31505e-18	-0.031072	3.64155e-17	-0.0299587
rs7619011	cg23730617	1.67e-17	2.20173e-17	-0.0255072	4.56402e-17	-0.0255259
rs2251746	cg09064148	2.03e-17	2.40128e-16	0.025044	3.62839e-15	0.0228964
rs2301271	cg11530659	2.51e-17	1.12409e-16	0.0182873	3.48654e-17	0.018074
rs16933086	cg25813936	7.65e-17	1.20716e-18	0.0343527	3.73521e-18	0.0311543
rs776	cg02287004	8.84e-17	6.34066e-16	-0.0265039	1.82707e-17	-0.0263675
rs10483038	cg20424643	1.86e-16	1.14791e-14	-0.0293843	8.23554e-17	-0.0318446
rs171094	cg14279361	2.13e-16	1.3486e-15	-0.0296967	1.06959e-15	-0.0297681
rs11672613	cg14279361	1.18e-06	9.10517e-07	0.0180114	4.15032e-07	0.0186673
rs212787	cg25075347	2.33e-16	5.00653e-16	-0.0230872	1.65589e-15	-0.0219822
rs1113431	cg02648298	2.39e-16	3.86505e-15	-0.0227055	5.7407e-15	-0.0233184
rs2062588	cg15948536	2.83e-16	2.7361e-15	-0.032741	7.39194e-18	-0.0359797
rs10090179	cg19504605	2.85e-16	2.13184e-14	0.0210351	2.22892e-14	0.0204628
rs10864363	cg06159269	2.87e-16	7.861e-16	-0.0323126	2.35257e-15	-0.0298721
rs1800759	cg12011299	3.32e-16	1.78278e-15	0.021315	9.71331e-14	0.0183951
rs1025624	cg14306366	3.58e-16	9.22439e-16	0.0383478	7.1187e-25	0.0393255
rs7779057	cg00530438	7.58e-16	1.80383e-14	-0.0239666	2.61127e-16	-0.0255788
rs1497077	cg20550154	8.34e-16	1.36319e-15	-0.0217087	1.79102e-14	-0.020963
rs1010366	cg16101574	9.3e-16	2.81301e-15	-0.0360843	4.39637e-19	-0.0423888
rs7936622	cg11217654	1.05e-15	8.28973e-15	-0.0250906	1.15448e-14	-0.0243343
rs11603071	cg17284609	1.68e-15	1.12462e-15	-0.0266546	1.19192e-17	-0.0254102
rs1833037	cg11694362	3.3e-15	4.96536e-15	0.0204182	6.71304e-18	0.0216283
rs12745466	cg11694362	1.81e-10	3.81266e-10	-0.016346	3.19977e-10	-0.0158923
rs3918349	cg17851604	3.33e-15	6.176e-16	0.0247857	1.32212e-15	0.023202
rs11902994	cg23527387	3.64e-15	4.14915e-15	0.0259146	7.93191e-14	0.0241972
rs2512726	cg03187668	5.71e-15	1.97821e-18	-0.0365017	2.58826e-19	-0.036502
rs1488373	cg16992008	6e-15	2.23931e-14	0.022636	3.17216e-14	0.0217897
rs3757316	cg10883421	7.23e-15	6.75687e-13	0.0165727	1.39355e-14	0.016092
rs4443717	cg14178348	8.44e-15	1.14999e-12	0.0179181	1.99598e-14	0.0193874
rs1490051	cg12375561	8.98e-15	3.41019e-13	-0.0248237	4.57744e-16	-0.0273975
rs2653601	cg00186954	1.4e-14	5.95274e-14	0.0262684	1.36681e-19	0.0273391
rs8037284	cg03314013	2.52e-14	1.48471e-13	0.0207542	3.11618e-13	0.0199368
rs10274707	cg25418001	2.91e-14	1.31451e-14	-0.0219824	2.50732e-16	-0.0222742
rs6763735	cg07480608	3.25e-14	5.41614e-14	-0.0263421	2.80696e-18	-0.0263409
rs2955355	cg23957660	3.5e-14	1.25047e-13	-0.0222273	3.41157e-16	-0.0234121
rs1033717	cg17485717	4.1e-14	6.56782e-14	0.0294132	4.78301e-17	0.029397
rs2741718	cg26795848	4.38e-14	3.14047e-14	-0.0239792	6.52243e-15	-0.0243776
rs1430410	cg01201279	4.72e-14	2.16277e-13	0.0245029	8.22652e-14	0.0240539
rs7776356	cg09547025	4.88e-14	4.60916e-14	0.0364038	1.53963e-16	0.035867
rs710567	cg03343083	6.46e-14	3.30501e-14	0.029597	5.50914e-12	0.0261155
rs12513498	cg25076039	6.81e-14	6.45855e-13	0.0258541	2.01559e-16	0.0263453
rs3094654	cg10804687	8.61e-14	7.17523e-14	-0.0293551	4.88325e-15	-0.0254925
rs11634726	cg17916960	1.56e-13	1.07631e-13	-0.019446	1.02091e-13	-0.0194255
rs7498878	cg07524214	2.02e-13	8.46624e-14	0.0330229	8.88048e-13	0.0303955
rs872945	cg04754454	2.58e-13	7.53328e-13	0.0142253	1.38385e-12	0.0142019
rs4891559	cg25817165	2.89e-13	5.08927e-14	0.0235408	2.87788e-15	0.0235485
rs2037190	cg11937849	4.72e-13	1.89413e-13	-0.0273715	2.90303e-13	-0.0263487
rs4698457	cg00555420	5.37e-13	1.85391e-12	0.017413	5.15455e-13	0.017399
rs28772724	cg17480035	5.9e-13	7.51987e-13	0.0344156	6.62018e-14	0.0355565
rs1401568	cg25518348	6.73e-13	7.05892e-12	-0.0144238	1.0394e-13	-0.0152567
rs2731647	cg12580445	1.35e-12	1.25018e-10	-0.0193498	1.14702e-13	-0.0217978
rs9302109	cg01768344	1.49e-12	4.78486e-12	0.0190328	6.31492e-15	0.0213038
rs8057673	cg04390829	1.81e-12	1.63594e-11	0.0212187	8.95738e-12	0.021308
rs7611274	cg26854140	1.87e-12	1.37988e-10	0.0174041	4.66489e-13	0.0185104
rs1317290	cg18685330	2.1e-12	1.04717e-10	-0.0254667	9.8724e-12	-0.0250077
rs179171	cg02312715	2.92e-12	2.69594e-12	-0.025573	7.87911e-15	-0.0234805
rs556759	cg24851651	3e-12	2.40004e-11	-0.0134122	5.05515e-11	-0.0134037
rs7241727	cg05134926	3.34e-12	1.14709e-11	-0.0218374	1.70165e-12	-0.0222401
rs6699938	cg00114966	3.63e-12	2.85765e-12	0.0171148	7.18517e-13	0.0171682
rs7697290	cg16518176	3.71e-12	8.06641e-13	0.028427	6.09468e-15	0.0278045
rs6816703	cg13735402	4.04e-12	2.72021e-12	0.0151569	3.35899e-11	0.0145825
rs13311962	cg03233332	4.68e-12	2.6414e-12	0.0393591	4.45854e-12	0.0392479
rs12325474	cg02918093	4.73e-12	2.06479e-11	-0.0176691	6.44289e-13	-0.0171789
rs807491	cg18805164	5.15e-12	2.23186e-10	-0.02118	3.38269e-12	-0.0225838
rs12189352	cg14868212	5.7e-12	2.97088e-11	-0.0162612	1.93373e-10	-0.0152522
rs1530344	cg20849935	5.73e-12	5.8936e-12	0.0172006	5.63145e-13	0.0175444
rs10401177	cg10188349	5.79e-12	1.49896e-10	-0.0151977	7.61854e-12	-0.0154085
rs1485587	cg15871215	8.55e-12	1.1033e-12	0.034651	1.50104e-12	0.0326641
rs4731190	cg11557463	9.31e-12	5.10392e-11	-0.0209329	4.22699e-13	-0.0224357
rs2683236	cg08662227	1.02e-11	1.81691e-11	-0.0290166	6.37561e-14	-0.030341
rs11122571	cg10442549	1.19e-11	1.53569e-10	-0.016339	3.09468e-11	-0.0164795
rs1016472	cg16061301	1.22e-11	2.11667e-12	0.0305219	2.707e-15	0.0286594
rs255277	cg25980539	1.32e-11	3.72044e-11	0.0334394	1.57991e-15	0.0352186
rs9112	cg02601475	1.64e-11	3.6595e-12	-0.0179109	1.31213e-11	-0.0156785
rs4619637	cg22411472	2.41e-11	2.06376e-11	0.0224268	5.94769e-13	0.0206339
rs2147105	cg16720578	2.76e-11	3.76363e-11	0.0190284	1.42658e-11	0.0189183
rs12679827	cg23549331	2.84e-11	4.37482e-11	-0.0224957	6.24444e-12	-0.0232827
rs7005444	cg23549331	5.03e-11	1.42222e-10	-0.0230036	1.01069e-10	-0.0231168
rs2164169	cg02046532	2.9e-11	5.55602e-11	-0.0276276	3.5753e-16	-0.0293465
rs1651895	cg15765251	2.99e-11	3.96095e-10	-0.0143265	4.42458e-12	-0.0148641
rs12478240	cg25430507	3.15e-11	6.44818e-11	0.0185653	4.13319e-12	0.0190954
rs9535102	cg11925609	3.25e-11	1.30887e-11	-0.0191025	3.91418e-17	-0.02119
rs17305311	cg11569329	3.68e-11	3.2545e-10	0.0151259	2.09673e-10	0.0154469
rs1868031	cg19318364	4.28e-11	1.83827e-10	0.0222653	2.79034e-11	0.0226182
rs11189552	cg03563354	5.27e-11	4.01485e-11	0.0217117	1.28455e-10	0.0210493
rs7660542	cg27417997	5.82e-11	1.40418e-11	-0.0202639	7.72246e-11	-0.0188389
rs11096936	cg05111603	5.97e-11	7.17628e-11	-0.0240942	1.11748e-12	-0.0232622
rs2339893	cg06209897	6.47e-11	2.26764e-10	-0.023457	2.30671e-12	-0.0243443
rs1561389	cg26367197	6.56e-11	1.77996e-10	0.0214949	2.25674e-11	0.0213271
rs4637783	cg03566001	6.9e-11	5.11548e-10	0.0308853	2.43619e-11	0.0285629
rs7378969	cg19459207	7.48e-11	1.29017e-10	0.017203	7.99453e-11	0.0164651
rs4875928	cg06440275	9.72e-11	4.03216e-11	-0.0325982	4.51577e-10	-0.0302213
rs1822036	cg06440275	2.23e-08	4.01346e-08	0.0233532	1.84167e-07	0.0219207
rs3127462	cg14649566	1.02e-10	2.19311e-10	-0.0288887	1.12207e-12	-0.0256798
rs9356940	cg16906346	1.05e-10	1.56871e-10	0.0102815	1.41972e-10	0.0102069
rs2808079	cg04359828	1.07e-10	7.46613e-10	0.0203212	6.0973e-15	0.0221674
rs4875928	cg03243893	1.14e-10	9.6268e-10	-0.0229223	5.7223e-11	-0.0239446
rs2852836	cg13820391	1.15e-10	6.69259e-11	0.00955637	1.23294e-10	0.00931289
rs2044869	cg23203918	1.26e-10	1.12302e-11	-0.0243962	1.46779e-13	-0.0271365
rs2239503	cg02722637	1.27e-10	3.49494e-11	-0.0188109	6.69133e-10	-0.0161784
rs7101437	cg04055981	1.3e-10	9.29403e-11	0.0210928	8.98283e-11	0.0215667
rs11880808	cg14725151	1.33e-10	1.36857e-09	-0.0255571	2.65908e-08	-0.0214338
rs11724609	cg04285362	1.34e-10	5.09797e-11	0.0214391	7.46586e-14	0.0222893
rs6491307	cg09122588	1.39e-10	7.99656e-11	0.0387509	1.59448e-17	0.0500608
rs6731687	cg08321382	1.41e-10	1.00646e-09	0.0182844	4.956e-11	0.0182286
rs486816	cg25407064	1.53e-10	5.10216e-11	0.0235467	1.39103e-10	0.0199123
rs7020282	cg21243750	1.53e-10	2.06201e-10	-0.0179216	1.01734e-09	-0.0136515
rs10222974	cg13593192	1.58e-10	1.70098e-11	-0.0339368	4.54256e-13	-0.0358127
rs12190473	cg05716726	1.95e-10	5.20534e-10	-0.0176256	9.20833e-11	-0.017736
rs1156086	cg05716726	3.22e-10	1.82083e-09	-0.0161283	5.28784e-10	-0.0160737
rs7712760	cg07322898	2.39e-10	2.46223e-10	-0.0203134	5.20649e-11	-0.0194204
rs3769252	cg08754268	2.53e-10	1.42455e-09	0.0191123	1.08582e-13	0.0208023
rs11937288	cg00431894	2.57e-10	1.16079e-10	-0.0243096	1.8413e-12	-0.0237724
rs7936723	cg08012199	2.73e-10	2.70312e-10	0.0241418	1.27628e-10	0.0232466
rs6691782	cg24361198	2.83e-10	3.5862e-10	0.0239618	3.21546e-14	0.0268897
rs7418599	cg24361198	7.13e-08	1.87122e-07	0.0197067	1.58602e-11	0.0236115
rs12652098	cg26626449	2.91e-10	4.65899e-11	0.0216086	8.6571e-10	0.0197407
rs2321997	cg22140866	3.23e-10	2.9275e-11	0.0165339	2.59656e-10	0.0154528
rs9395285	cg12968598	3.55e-10	1.78056e-10	-0.0179339	3.48469e-11	-0.0175775
rs2440335	cg06524553	3.58e-10	1.94562e-09	0.0143096	3.38261e-08	0.0122229
rs7748174	cg10134833	3.78e-10	1.53386e-09	-0.0277159	7.09141e-13	-0.0250815
rs373855	cg10470891	3.99e-10	2.57022e-09	0.0196838	2.74787e-10	0.0206172
rs734290	cg01029637	4.03e-10	2.59497e-10	-0.022664	1.12897e-13	-0.023189
rs835880	cg01029637	1.5e-06	3.0455e-06	0.0153545	4.17961e-07	0.0146221
rs4723924	cg13264672	4.15e-10	2.18e-10	0.0154688	1.07649e-13	0.0180656
rs12570348	cg04497547	4.62e-10	1.82771e-09	-0.011701	5.93233e-10	-0.0122055
rs12925527	cg01449973	4.66e-10	7.85e-12	0.0239712	5.85035e-13	0.0238198
rs12989971	cg24929896	4.7e-10	9.76436e-10	-0.024529	1.5114e-12	-0.0245109
rs2394255	cg06889979	4.79e-10	3.86193e-08	0.0163487	2.1893e-10	0.0183791
rs11168740	cg11661914	5.65e-10	2.54655e-09	-0.0179833	7.49949e-08	-0.0160551
rs17112008	cg26671749	5.78e-10	2.73895e-10	-0.0155199	4.53314e-10	-0.0151874
rs12415091	cg14149699	5.78e-10	1.07624e-09	0.0276815	1.60018e-14	0.029246
rs13256474	cg10147462	5.82e-10	1.49263e-09	-0.0221303	1.88494e-11	-0.0210882
rs451195	cg19077854	6.57e-10	5.43676e-09	0.0181389	1.09838e-07	0.0174504
rs7087336	cg05278858	6.75e-10	6.5023e-09	0.0237201	2.779e-12	0.0246556
rs907396	cg27398640	6.99e-10	4.1755e-10	0.0178023	2.44281e-13	0.0194301
rs9316393	cg15108060	7.03e-10	1.63915e-10	-0.0652371	2.30189e-08	-0.0538031
rs9494155	cg21276456	8.02e-10	1.11256e-09	-0.017434	6.48934e-11	-0.0152107
rs12903325	cg21670987	8.99e-10	1.88211e-09	-0.016308	3.32665e-10	-0.0160615
rs11136620	cg23564432	9.68e-10	4.93805e-09	0.0182974	5.43568e-11	0.0192113
rs10490169	cg23851515	9.85e-10	3.52214e-09	0.0290696	6.53255e-11	0.027248
rs661171	cg05839709	9.94e-10	5.18718e-10	-0.0190353	4.32811e-09	-0.016101
rs2188714	cg22709100	1.03e-09	6.27199e-10	-0.0599514	5.18209e-09	-0.0525062
rs1383966	cg22651812	1.12e-09	4.04737e-09	0.0155671	3.37229e-09	0.0158233
rs4728147	cg07211516	1.19e-09	3.75402e-09	0.0249639	5.31864e-11	0.021992
rs9261453	cg19495308	1.26e-09	6.68305e-09	-0.0175377	2.23904e-13	-0.0194865
rs5000634	cg19301366	1.3e-09	5.10382e-09	0.0151629	1.81138e-09	0.0143579
rs1692120	cg23038520	1.32e-09	4.78575e-09	-0.0151747	1.46231e-08	-0.0148701
rs349416	cg24735225	1.32e-09	2.29183e-09	-0.0254869	3.52412e-08	-0.0232167
rs9302176	cg00626386	1.36e-09	2.77719e-09	-0.0151035	3.87501e-10	-0.015234
rs2132157	cg21039679	1.48e-09	2.74705e-09	-0.0187309	3.6846e-09	-0.0170307
rs8023192	cg07967723	1.5e-09	6.51433e-10	0.0223666	2.34512e-11	0.0226186
rs12706933	cg15691775	1.5e-09	8.55281e-09	0.0160141	1.42151e-08	0.0153612
rs17562397	cg15691775	7.57e-09	3.53446e-07	-0.0137722	8.89316e-08	-0.0140686
rs887649	cg07080556	1.55e-09	1.46894e-09	-0.0419771	3.78272e-11	-0.0401485
rs2468811	cg06344784	1.66e-09	3.47805e-09	-0.0183448	2.43177e-09	-0.0184627
rs757102	cg26043460	1.68e-09	9.44684e-09	-0.0179772	1.17438e-14	-0.0193972
rs17351243	cg05916196	1.71e-09	6.28801e-09	-0.0158955	5.9684e-09	-0.0144459
rs883263	cg27085265	1.91e-09	1.24058e-09	-0.0150646	4.48957e-10	-0.0146272
rs202102	cg04551440	1.92e-09	4.40371e-09	-0.0160103	3.44769e-09	-0.0158284
rs6942824	cg16692494	2.03e-09	9.09115e-09	0.0179969	1.21892e-11	0.0191614
rs1155458	cg27125364	2.08e-09	3.65967e-09	0.0228683	3.31738e-09	0.0209207
rs2301134	cg01966878	2.18e-09	2.01862e-09	0.01513	2.87859e-11	0.0155757
rs3817043	cg14040899	2.42e-09	2.36073e-09	-0.017952	6.15929e-08	-0.016066
rs7405640	cg05454957	2.74e-09	3.49296e-09	0.0231196	3.77269e-07	0.0183221
rs1718119	cg26656658	2.94e-09	4.6723e-09	-0.0238786	3.16214e-11	-0.0247843
rs2302719	cg04521981	3.03e-09	1.98495e-09	0.0185079	5.2412e-09	0.0174481
rs617873	cg10318641	3.08e-09	1.05482e-08	0.0187889	4.10089e-09	0.0178407
rs2293496	cg21877010	3.28e-09	9.14876e-09	0.0171895	4.34381e-09	0.0168588
rs26899	cg06952129	3.48e-09	5.5722e-09	-0.0507123	3.53875e-08	-0.0465898
rs7320510	cg10512779	3.71e-09	3.66853e-09	0.0144174	8.23747e-08	0.0130689
rs12422699	cg20261440	3.83e-09	1.31327e-09	-0.0172299	2.10976e-09	-0.0165571
rs1138465	cg18831671	4.2e-09	5.63238e-09	-0.018495	2.33033e-12	-0.0170763
rs306169	cg11127569	4.3e-09	6.06189e-10	-0.0163469	7.00895e-09	-0.0149649
rs1292646	cg21116077	4.83e-09	1.16206e-08	0.0246437	2.2612e-12	0.0274757
rs4655890	cg18202412	5.51e-09	5.49096e-08	-0.0180447	1.12537e-09	-0.0180476
rs4791284	cg22660033	5.54e-09	1.64484e-08	0.0226966	2.84327e-09	0.0200106
rs7094698	cg10865127	5.88e-09	7.16958e-09	0.0190187	5.15373e-08	0.0181623
rs6938061	cg14926196	5.99e-09	2.12196e-09	-0.0188894	4.70289e-10	-0.0190983
rs722410	cg12759523	6.41e-09	4.51336e-09	-0.0179504	1.21912e-07	-0.0151764
rs1375013	cg04265964	6.53e-09	7.16289e-09	0.0221343	7.61315e-11	0.0222537
rs2452593	cg17815886	6.54e-09	6.57423e-08	-0.0188347	9.08344e-08	-0.0191038
rs1128585	cg16427107	6.67e-09	3.53253e-07	-0.0200197	7.60867e-08	-0.0201156
rs4901511	cg02270243	6.68e-09	1.06488e-08	0.0243072	1.94939e-11	0.022488
rs7339081	cg07926092	7.36e-09	6.1605e-08	-0.0264943	1.16922e-10	-0.031431
rs13124511	cg19463078	7.44e-09	6.14863e-09	0.0392874	2.14654e-15	0.0386305
rs10076782	cg26403843	7.55e-09	1.40806e-08	-0.0132805	6.5454e-07	-0.0114873
rs3827737	cg15064681	7.65e-09	1.71757e-07	-0.0234691	1.41262e-12	-0.0245062
rs4689866	cg07891820	7.94e-09	5.15454e-09	-0.047048	4.55377e-12	-0.0395125
rs2297778	cg03651715	8.12e-09	8.63532e-09	-0.0127066	1.04722e-09	-0.012821
rs9316393	cg05801989	8.45e-09	2.06249e-09	0.0179665	6.52684e-10	0.0161103
rs7619865	cg20734569	8.52e-09	7.00517e-08	0.0149263	2.10076e-08	0.0154977
rs397020	cg16922058	8.56e-09	1.00902e-08	-0.0277543	6.91562e-07	-0.0207529
rs3904095	cg19272349	8.73e-09	6.86276e-09	0.021029	1.22166e-12	0.0228507
rs11774069	cg15463563	9.5e-09	1.40723e-07	-0.02438	2.42231e-08	-0.0246185
rs12954590	cg05121497	9.77e-09	6.74918e-09	-0.0380022	1.53837e-11	-0.0329128
rs215690	cg20110742	9.78e-09	5.57403e-07	0.0178781	1.66497e-07	0.0175069
rs919276	cg07809484	9.83e-09	1.69721e-07	-0.0159423	6.51323e-08	-0.0158458
rs7993394	cg08381562	1.03e-08	1.56144e-08	0.0239479	9.45154e-11	0.0244565
rs9892363	cg00007215	1.08e-08	4.27281e-08	0.0155974	3.17471e-08	0.0150222
rs9922011	cg02380802	1.1e-08	2.20046e-08	-0.0157599	6.17022e-08	-0.0145669
rs763809	cg22609511	1.12e-08	2.39452e-09	0.0211891	4.85451e-09	0.0203868
rs9326845	cg18054620	1.13e-08	3.0813e-08	-0.020297	8.24359e-08	-0.0158202
rs17377643	cg00369909	1.24e-08	5.37016e-08	-0.013073	2.63096e-11	-0.0143476
rs2038921	cg03948048	1.26e-08	2.14004e-08	-0.0168536	6.72894e-07	-0.0139658
rs10162426	cg24108579	1.29e-08	2.35943e-08	-0.0116697	3.72533e-09	-0.0122993
rs6987802	cg26558023	1.32e-08	3.64154e-08	0.0225227	9.90637e-12	0.0251369
rs7946556	cg09667753	1.33e-08	4.78019e-08	-0.0175492	1.3087e-09	-0.0177192
rs3873260	cg04246123	1.41e-08	1.40384e-08	-0.0219102	1.38818e-09	-0.0204817
rs1034316	cg03746930	1.43e-08	3.26086e-09	0.0182044	4.64787e-08	0.0162501
rs7130248	cg03368665	1.46e-08	2.99653e-08	-0.0138903	1.0021e-07	-0.0132487
rs3823375	cg17134700	1.56e-08	1.50244e-07	0.0157047	1.65246e-07	0.0140758
rs490633	cg07424927	1.56e-08	6.34396e-09	-0.0274918	1.03588e-11	-0.0285526
rs12293167	cg00013006	1.56e-08	2.94755e-08	-0.0151326	8.11473e-09	-0.01555
rs1328965	cg10816283	1.59e-08	4.2281e-08	-0.0172594	9.99281e-10	-0.017664
rs6422414	cg24880022	1.67e-08	6.26855e-08	0.0138225	1.61677e-08	0.0130834
rs3777677	cg07285237	1.69e-08	3.02029e-08	0.0140156	4.55772e-08	0.0133158
rs3006069	cg14843632	1.75e-08	7.95869e-08	0.0196896	2.07076e-10	0.023206
rs10786044	cg10452581	1.75e-08	7.93366e-09	-0.0205464	1.30037e-10	-0.0203291
rs6903608	cg13318793	1.77e-08	3.13164e-07	0.0326455	2.57723e-08	0.0331078
rs10095483	cg22594214	1.82e-08	5.12269e-08	0.0152978	1.96021e-08	0.014198
rs10090201	cg20227326	1.83e-08	2.05738e-08	0.0201801	3.20059e-08	0.0145954
rs17052396	cg22648282	1.87e-08	3.80281e-08	0.0174239	4.98108e-09	0.0182328
rs1011870	cg04074153	1.9e-08	2.80665e-09	0.0197941	2.43633e-08	0.0182277
rs4045957	cg14317384	1.98e-08	1.26381e-08	-0.0232916	9.0232e-09	-0.0231568
rs2284060	cg14247180	1.98e-08	8.3068e-09	-0.0266269	3.39087e-07	-0.0188787
rs1617837	cg03652564	2.04e-08	1.58106e-08	0.0136669	1.13772e-07	0.0118724
rs1062748	cg07612300	2.08e-08	3.43525e-08	-0.0165682	2.26902e-13	-0.0186554
rs11766216	cg11236311	2.09e-08	2.76016e-08	-0.0251388	2.55136e-15	-0.0316017
rs980299	cg25700686	2.49e-08	3.30219e-08	-0.0183662	4.36426e-08	-0.0182295
rs1481792	cg25700686	2.07e-07	4.11398e-07	-0.0161793	1.36285e-07	-0.0168503
rs6899076	cg11847992	2.57e-08	2.07699e-08	-0.0149084	4.32321e-08	-0.014387
rs4670876	cg13022624	2.73e-08	5.13254e-08	0.0190219	1.66955e-10	0.0201511
rs10875883	cg07462861	3.22e-08	5.79638e-07	-0.00831878	4.02902e-08	-0.00872123
rs870959	cg17996830	3.27e-08	3.03755e-08	0.0188455	1.00294e-09	0.0201369
rs1343652	cg26194641	3.34e-08	3.63914e-08	0.0100861	3.99117e-07	0.00922866
rs1635291	cg12609785	3.36e-08	4.19515e-08	-0.0263758	2.4035e-08	-0.0262686
rs2889606	cg00160872	3.48e-08	1.31889e-07	-0.0324416	1.09839e-07	-0.0306926
rs17721404	cg00160872	1.68e-07	3.5263e-07	0.0308355	8.28659e-08	0.0306153
rs3826007	cg24924631	3.49e-08	6.58152e-08	-0.0257814	1.85199e-11	-0.0256397
rs2732842	cg07720865	3.49e-08	8.42584e-08	0.0216968	9.73116e-08	0.0198823
rs7683984	cg15330419	3.56e-08	9.10691e-08	0.0237174	1.37267e-08	0.0157364
rs7149337	cg23942311	3.56e-08	6.72174e-09	0.010762	1.61231e-07	0.00937677
rs10733543	cg13556767	3.69e-08	1.58475e-08	0.0170242	1.00193e-07	0.0148388
rs1319501	cg05004518	3.7e-08	2.72901e-07	0.027092	7.79154e-07	0.025094
rs2589939	cg25186680	3.7e-08	5.23021e-08	0.0234387	9.51708e-14	0.0199572
rs6850750	cg07829377	3.77e-08	4.98578e-08	-0.0171854	2.10011e-09	-0.0186699
rs3811759	cg22289785	3.86e-08	1.00013e-07	0.0218652	8.75368e-08	0.0218101
rs653242	cg13077366	3.9e-08	1.7754e-08	-0.0104811	4.09241e-13	-0.0122064
rs3810204	cg21956434	4.32e-08	3.90151e-07	-0.0162155	6.76265e-09	-0.0186157
rs3745185	cg21956434	6.91e-07	1.31024e-06	0.0145594	9.85531e-08	0.016003
rs1383267	cg03465320	4.61e-08	2.9435e-08	0.0155062	1.46229e-08	0.0151014
rs17289394	cg09798090	4.68e-08	2.02838e-07	0.00681674	1.51281e-07	0.00706703
rs242557	cg04491389	4.97e-08	1.16271e-07	-0.016579	3.66331e-10	-0.017839
rs12938031	cg04491389	4.6e-07	9.25664e-07	0.0155939	2.05847e-08	0.0161865
rs2788853	cg07791160	4.97e-08	5.62697e-07	-0.0149875	5.21702e-07	-0.0149177
rs9358450	cg00955808	5.01e-08	1.1849e-08	-0.0172444	1.92071e-08	-0.0162408
rs1789250	cg26662520	5.27e-08	8.99545e-08	-0.0272891	9.2735e-09	-0.0226492
rs17370615	cg11714334	5.33e-08	3.38205e-07	-0.0148504	1.78264e-06	-0.0139147
rs12067861	cg08240383	5.45e-08	4.37786e-08	-0.031261	6.7766e-09	-0.0243549
rs3130304	cg08976526	5.49e-08	3.17582e-08	0.021573	3.51588e-05	0.0126383
rs2412322	cg11440486	5.51e-08	7.54477e-08	-0.010115	7.10829e-06	-0.008499
rs1724425	cg21214508	5.57e-08	2.15762e-06	0.0128062	7.19533e-09	0.0151155
rs7243054	cg14166494	5.76e-08	3.93966e-08	0.0238637	1.66987e-08	0.0214509
rs3107151	cg26910870	5.99e-08	9.54162e-08	0.0189693	9.54254e-08	0.0176664
rs2941054	cg18508148	6.33e-08	2.29345e-07	0.00954014	2.10806e-08	0.0105205
rs6731238	cg02550950	6.4e-08	2.02581e-07	-0.0144634	7.10348e-11	-0.0176063
rs2778672	cg09642378	6.55e-08	5.82771e-08	0.0197623	2.03985e-08	0.0173371
rs7087438	cg07771287	6.69e-08	4.18075e-07	0.0247661	1.25452e-06	0.0228904
rs5759093	cg07593264	6.83e-08	7.73178e-07	0.0165638	7.26744e-08	0.0156464
rs4148324	cg08697797	6.88e-08	3.03221e-07	-0.0167136	3.45803e-07	-0.0153443
rs1984584	cg20730595	6.93e-08	1.00901e-07	-0.0284998	1.75348e-10	-0.026465
rs7311233	cg25459280	7.04e-08	1.3955e-07	-0.0163923	2.31128e-07	-0.0149935
rs6433294	cg15701714	7.16e-08	4.27189e-07	-0.0124129	3.31388e-09	-0.013451
rs10173317	cg27597853	7.24e-08	2.56595e-07	0.0124055	5.50426e-08	0.0123469
rs2142138	cg00943985	7.57e-08	5.95253e-08	0.0155521	4.17935e-08	0.0147887
rs2420936	cg18566515	7.7e-08	3.08722e-08	0.010374	9.29161e-08	0.00982396
rs6421967	cg17547742	7.94e-08	6.38417e-07	0.0272206	6.91895e-07	0.0255752
rs747472	cg13384849	8.36e-08	9.45366e-08	-0.0178658	2.39882e-08	-0.0155294
rs6577052	cg20022454	8.65e-08	1.68997e-07	0.0229328	1.17803e-08	0.0228559
rs6960062	cg10204951	9.85e-08	1.36375e-08	-0.0216469	6.05292e-06	-0.0155233
rs7097573	cg22845855	1.01e-07	2.32934e-08	-0.0123385	3.04917e-06	-0.0102242
rs7339081	cg05295671	1.02e-07	1.7135e-07	-0.0214473	2.9391e-11	-0.0250423
rs1969869	cg24853868	1.04e-07	2.59688e-08	-0.0179659	5.83837e-08	-0.0168986
rs6960994	cg25907594	1.06e-07	3.86597e-08	0.0220836	8.91309e-09	0.0194783
rs4852706	cg22039638	1.07e-07	2.7166e-08	0.0165333	8.79876e-07	0.0139273
rs13146272	cg11969330	1.1e-07	4.37594e-07	0.0243807	1.2125e-08	0.0261765
rs4842653	cg00757033	1.11e-07	6.47559e-08	-0.0248592	2.87725e-10	-0.0245311
rs11208377	cg08036553	1.12e-07	1.33778e-07	0.0192077	3.10638e-08	0.0184024
rs11783855	cg24465384	1.12e-07	7.0471e-07	0.0148648	6.55033e-07	0.0149484
rs3826828	cg00419186	1.15e-07	6.07587e-07	0.018911	3.80103e-08	0.0164601
rs7160227	cg15815318	1.18e-07	7.6844e-08	0.0174594	2.69801e-06	0.0131395
rs6772499	cg15036157	1.19e-07	5.22063e-07	0.0285761	1.19795e-08	0.0277008
rs9857252	cg14220170	1.19e-07	4.75358e-07	0.012817	2.19025e-11	0.0151092
rs7564520	cg20822693	1.23e-07	1.61498e-07	0.0174142	4.03215e-09	0.0194193
rs2599396	cg21158075	1.25e-07	1.10491e-07	-0.0126717	3.80938e-09	-0.0122868
rs4262083	cg23068621	1.28e-07	2.82528e-07	-0.0172183	1.09197e-05	-0.0125175
rs6816548	cg17542795	1.31e-07	5.02646e-06	-0.0316749	1.1242e-06	-0.0323466
rs708724	cg16031515	1.31e-07	1.91562e-07	0.0171779	7.4616e-13	0.0204757
rs7582137	cg23206520	1.36e-07	7.7936e-08	0.0163158	6.16509e-06	0.0133954
rs2064721	cg21351392	1.37e-07	6.83947e-07	0.0177461	1.95769e-06	0.0159343
rs746731	cg21351392	1.5e-06	8.4146e-06	-0.0189391	5.0045e-06	-0.0182125
rs7180844	cg21700663	1.38e-07	1.48638e-07	-0.0127633	0.000260459	-0.00664456
rs3740304	cg19082416	1.39e-07	6.74265e-08	-0.021791	1.18183e-08	-0.0203032
rs17370615	cg22147449	1.4e-07	1.93335e-06	-0.00970068	3.96491e-06	-0.00919376
rs7143959	cg20512044	1.41e-07	1.97601e-07	-0.0117562	1.49259e-06	-0.00975719
rs9296097	cg06253072	1.44e-07	2.94588e-07	-0.0173711	2.40967e-09	-0.0187177
rs12655145	cg03212797	1.47e-07	3.30303e-07	-0.0126597	4.61389e-09	-0.00983894
rs9347340	cg11366901	1.5e-07	3.47864e-06	-0.00944506	1.2589e-06	-0.00955666
rs2024100	cg00176740	1.51e-07	1.96876e-07	-0.0157634	2.03499e-05	-0.0114902
rs7827372	cg17721355	1.51e-07	2.17147e-08	0.0136481	8.08424e-07	0.0118293
rs4305581	cg09943401	1.53e-07	1.89917e-06	0.0123877	7.12255e-08	0.0133875
rs2613996	cg22993527	1.59e-07	9.31925e-08	-0.0203549	1.65226e-06	-0.0169745
rs12220651	cg26334209	1.6e-07	2.71293e-07	0.0169862	1.78523e-06	0.0151758
rs1001450	cg17722884	1.63e-07	8.60195e-08	-0.0141819	0.000156516	-0.00752274
rs1016528	cg20130571	1.72e-07	2.00764e-07	-0.0178826	4.84325e-06	-0.0152498
rs13435787	cg15264404	1.72e-07	1.10841e-07	-0.0233078	4.54396e-08	-0.0214524
rs2074546	cg14954836	1.74e-07	4.89678e-07	0.0103462	2.99433e-06	0.00925268
rs2339893	cg06976598	1.82e-07	1.08837e-06	-0.0186227	8.40555e-09	-0.020072
rs10890774	cg12974393	1.83e-07	2.53947e-07	-0.0191581	2.57516e-07	-0.0178862
rs11159841	cg18078958	1.87e-07	1.46206e-07	-0.0140183	1.21225e-07	-0.0120647
rs7909243	cg13799081	1.91e-07	1.33386e-07	-0.0198879	4.19321e-08	-0.0188171
rs4768730	cg09447675	1.92e-07	3.25165e-07	-0.0196204	5.85272e-08	-0.0179533
rs6966915	cg23422036	1.93e-07	4.99013e-08	0.0113795	4.43529e-07	0.01043
rs7309	cg13854012	2.1e-07	5.17573e-07	-0.017885	8.40044e-06	-0.0144406
rs2467248	cg18229049	2.12e-07	4.71288e-07	0.0253608	2.04313e-08	0.0260506
rs4722187	cg02463988	2.13e-07	7.72129e-07	0.0137982	5.35588e-10	0.0157522
rs7711188	cg02002240	2.15e-07	9.42064e-08	0.0330145	1.24618e-06	0.0238064
rs11635675	cg20547806	2.2e-07	2.94666e-07	0.0117888	3.02271e-10	0.0133282
rs13396069	cg14989714	2.23e-07	4.25292e-07	-0.0178069	4.27878e-06	-0.0144168
rs13021385	cg14989714	4.03e-07	7.31864e-07	0.0176371	1.07627e-06	0.0154409
rs1851665	cg12454167	2.25e-07	2.38302e-07	-0.0153498	2.29399e-07	-0.014779
rs1158569	cg16277922	2.26e-07	8.29421e-08	0.0545845	1.90843e-08	0.053499
rs4975625	cg12637397	2.29e-07	5.13122e-07	-0.00999071	0.000154933	-0.00653065
rs1477502	cg23363182	2.35e-07	5.85331e-07	0.0309414	1.23005e-07	0.028722
rs2318095	cg25680145	2.36e-07	7.26403e-07	-0.0210263	3.90796e-08	-0.0217833
rs4580814	cg02762475	2.36e-07	6.4992e-07	0.0124232	8.43664e-06	0.0109938
rs1407575	cg23734418	2.4e-07	3.82007e-07	-0.0189767	2.12797e-06	-0.0163405
rs7431819	cg12898595	2.44e-07	3.34774e-08	-0.018899	1.31435e-08	-0.015998
rs2403205	cg18984103	2.45e-07	2.43733e-07	0.0121928	2.18058e-07	0.0115299
rs9904377	cg26251398	2.48e-07	7.92931e-07	-0.0140219	2.27022e-06	-0.0121651
rs4687360	cg07620573	2.51e-07	9.56673e-08	0.0181273	1.04394e-07	0.0168215
rs719785	cg07587209	2.55e-07	5.96127e-07	0.0185214	7.80664e-09	0.0154668
rs2236225	cg09223940	2.56e-07	2.24198e-07	-0.0158732	1.43896e-06	-0.0132179
rs151835	cg24982541	2.58e-07	3.41612e-07	-0.0170954	3.76736e-08	-0.0161192
rs1632988	cg10807461	2.64e-07	8.96366e-07	-0.0140764	1.09837e-06	-0.0137284
rs2859741	cg09363841	2.72e-07	7.47651e-08	-0.0392237	1.414e-05	-0.030744
rs3843376	cg12594803	2.73e-07	1.50433e-06	-0.0152572	7.07429e-09	-0.0158887
rs7622156	cg08276221	2.74e-07	1.95359e-06	-0.0127346	6.24127e-08	-0.0129686
rs11633294	cg13297560	2.75e-07	8.96908e-07	0.0164508	1.25921e-07	0.0169088
rs17370615	cg22247277	2.78e-07	6.23057e-06	-0.0144184	1.28931e-05	-0.0136509
rs440597	cg22620746	2.83e-07	3.10203e-07	0.0204272	7.35823e-07	0.0191872
rs2316131	cg05898907	2.88e-07	3.11358e-07	-0.0200185	9.24945e-07	-0.0176825
rs4286585	cg01790032	2.89e-07	5.4687e-07	0.0151894	7.12326e-07	0.0145964
rs13292096	cg13736810	2.89e-07	6.3599e-08	-0.0132939	1.24661e-06	-0.0115307
rs3809109	cg10261205	2.95e-07	8.35831e-07	0.0076225	7.2121e-08	0.00785158
rs17364223	cg06133097	2.98e-07	6.26473e-07	0.0165597	3.04239e-07	0.0157416
rs1378472	cg19755714	2.99e-07	3.92418e-07	0.0143479	1.35863e-09	0.0159655
rs17370615	cg22041137	3.15e-07	2.2608e-06	0.0389087	9.4776e-07	0.0395726
rs2219383	cg20694715	3.16e-07	4.97817e-06	-0.014664	2.32149e-06	-0.0149531
rs4927848	cg04425270	3.17e-07	6.64942e-08	0.019831	2.96158e-07	0.0180786
rs10514710	cg26781129	3.2e-07	2.52724e-07	0.0185048	1.17043e-06	0.0166641
rs17370615	cg13879875	3.23e-07	2.1166e-06	-0.0162103	6.00667e-07	-0.0155459
rs3751497	cg23176270	3.3e-07	8.51843e-07	0.0153696	1.82626e-05	0.0131219
rs7818308	cg12682382	3.31e-07	5.87845e-07	-0.0183307	9.89108e-09	-0.0171544
rs7738608	cg27395391	3.33e-07	6.29246e-07	0.0270162	1.72687e-14	0.0317283
rs10773819	cg21833366	3.34e-07	8.50941e-08	-0.0131744	1.93841e-06	-0.0118753
rs2700844	cg20830867	3.41e-07	1.28371e-06	0.0214939	2.66612e-08	0.0221949
rs6820570	cg21836699	3.43e-07	9.79231e-09	-0.0444873	1.09579e-10	-0.0469258
rs10874763	cg01538778	3.47e-07	2.00394e-07	0.0134879	1.18035e-06	0.0119235
rs6425730	cg07478791	3.49e-07	2.21791e-07	-0.0195812	7.09134e-06	-0.0176628
rs2494462	cg07919760	3.56e-07	3.13783e-07	-0.0146233	5.06375e-06	-0.0121662
rs4799088	cg26740109	3.58e-07	4.71483e-07	0.0250893	3.53823e-08	0.0234347
rs11084402	cg15916628	3.63e-07	1.27363e-06	-0.0165714	7.00683e-07	-0.0167165
rs12451009	cg00936449	3.65e-07	9.41915e-07	-0.011418	2.04739e-07	-0.0121586
rs7832710	cg06435363	3.66e-07	5.18421e-07	-0.019204	9.74864e-07	-0.0176886
rs6546923	cg02831290	3.66e-07	3.76795e-07	-0.0222113	6.07471e-08	-0.0200519
rs11099807	cg17479576	3.68e-07	1.28782e-07	-0.042278	1.03382e-05	-0.0315438
rs11775658	ch.8.52117604R	3.7e-07	7.74983e-07	0.0186766	3.09442e-12	0.0175331
rs2978339	cg21769514	3.77e-07	7.19667e-07	0.0169976	8.59134e-07	0.0162664
rs560941	cg03957547	3.78e-07	9.37653e-07	0.0166979	2.16424e-09	0.0175782
rs11653487	cg17542650	3.81e-07	1.751e-07	0.0234624	8.18013e-06	0.0193071
rs3131854	cg23912231	3.86e-07	8.95073e-07	-0.021834	6.1871e-16	-0.0187166
rs532154	cg08723637	4.09e-07	9.75944e-07	-0.0199781	1.25683e-06	-0.0195075
rs2817110	cg01865606	4.19e-07	9.28926e-07	-0.0105726	2.28019e-06	-0.00911153
rs4692549	cg21613905	4.21e-07	2.8744e-07	0.0106342	8.39276e-07	0.0102609
rs2683236	cg05624577	4.22e-07	7.19129e-07	-0.0224908	3.02617e-07	-0.0228267
rs17423255	cg23691223	4.23e-07	5.06859e-08	-0.0120655	1.1485e-07	-0.0115942
rs323406	cg08453903	4.27e-07	1.86709e-07	0.0157193	1.28331e-07	0.0159462
rs567577	cg08353955	4.27e-07	2.28974e-06	-0.0196138	4.05559e-07	-0.0201507
rs2417280	cg14201929	4.41e-07	8.68298e-07	-0.0381295	1.70781e-07	-0.0360484
rs252564	cg26754472	4.42e-07	9.32581e-07	-0.0149226	1.2993e-06	-0.0140984
rs6585989	cg22674789	4.43e-07	2.72793e-07	-0.0213176	8.68028e-07	-0.0194106
rs1013841	cg01359822	4.46e-07	5.25979e-07	0.0106089	1.27747e-07	0.0107587
rs1862485	cg23384886	4.51e-07	1.60239e-05	-0.0170579	1.36356e-05	-0.0171382
rs4841005	cg01774131	4.51e-07	7.2674e-07	0.0167656	2.30836e-06	0.0132144
rs4727090	cg02826890	4.57e-07	5.22988e-06	-0.0135123	7.14593e-09	-0.016354
rs4845624	cg06521149	4.59e-07	7.86179e-07	0.0213034	2.97718e-07	0.0213945
rs2238630	cg16023110	4.62e-07	1.75053e-06	0.0282064	1.17222e-06	0.0253775
rs1437683	cg11592631	4.68e-07	2.5479e-06	0.0108498	1.0879e-05	0.0100958
rs11691523	cg11592631	2.39e-06	3.98689e-05	-0.0117687	3.81781e-06	-0.0130822
rs17784233	cg09719124	4.86e-07	2.29933e-07	0.0202665	1.20545e-06	0.0142014
rs229522	cg20979921	5.01e-07	5.42462e-07	0.0168327	0.000250816	0.01106
rs9318552	cg20028827	5.02e-07	1.48011e-06	0.0130036	6.99709e-07	0.0132218
rs9861999	cg16274205	5.02e-07	2.66713e-07	0.0126755	1.10976e-06	0.0119551
rs756502	cg25157999	5.09e-07	3.22183e-07	-0.015397	2.11193e-09	-0.0162542
rs478265	cg15983584	5.14e-07	1.28148e-06	0.0146972	2.60292e-07	0.0148036
rs2004083	cg05998449	5.27e-07	3.9681e-06	0.0335363	2.87214e-06	0.0270494
rs6650624	cg18008372	5.42e-07	2.32877e-07	-0.0229336	1.4292e-08	-0.0197731
rs3900981	cg02993606	5.44e-07	1.0259e-07	0.0211854	5.83403e-08	0.0199541
rs12536631	cg11129772	5.62e-07	1.48321e-06	-0.0197395	2.38233e-07	-0.0198
rs2172998	cg26999154	5.86e-07	6.00213e-07	-0.0150634	4.57157e-07	-0.0153558
rs4786303	cg11062956	5.9e-07	8.67198e-06	0.0180768	2.68186e-07	0.0200563
rs6598448	cg26475500	5.91e-07	5.69498e-07	0.0136739	1.44473e-07	0.013477
rs151719	cg00119778	5.98e-07	3.98111e-07	-0.0207798	0.000128016	-0.0144583
rs6903608	cg00119778	1.37e-05	2.44025e-05	-0.0173503	0.000436411	-0.0134146
rs9389610	cg07185983	5.99e-07	1.05599e-06	-0.0128585	1.40827e-07	-0.0111181
rs2588512	cg12813441	6.03e-07	6.6912e-07	0.0213311	2.47756e-07	0.0199467
rs6691100	cg25026456	6.05e-07	4.49044e-06	-0.00897227	3.56354e-06	-0.00951248
rs12885300	cg08183125	6.16e-07	2.88224e-07	-0.0164645	4.25987e-07	-0.0158089
rs9308363	cg09684264	6.3e-07	1.26219e-07	-0.0125314	9.84748e-07	-0.0113751
rs2306806	cg05850870	6.35e-07	9.33283e-07	-0.0167894	1.5221e-07	-0.0158794
rs12483496	cg04893913	6.4e-07	7.73219e-07	0.0133855	1.32477e-05	0.0112381
rs2056892	cg20850984	6.44e-07	4.86116e-07	-0.0228902	5.59804e-07	-0.0185085
rs3212358	cg01023759	6.45e-07	1.27673e-06	0.0137021	3.48031e-07	0.0130151
rs12925933	cg01023759	1.68e-06	4.73963e-06	0.0138681	1.39575e-05	0.0118815
rs7146	cg27197643	6.46e-07	6.52596e-06	-0.0147105	2.07984e-06	-0.0146665
rs10862508	cg17391672	6.47e-07	8.69964e-07	-0.013792	1.27172e-06	-0.0115741
rs4394377	cg21745092	6.5e-07	3.36855e-07	-0.013112	6.99481e-06	-0.0111279
rs7251928	cg14245421	6.65e-07	4.40955e-05	-0.0196592	3.36297e-08	-0.0214814
rs7968375	cg06826457	6.67e-07	1.93149e-06	0.00948492	2.45198e-06	0.00874965
rs12740505	cg23895273	6.68e-07	3.50034e-06	-0.0124748	1.13373e-10	-0.0148235
rs11165042	cg04831900	6.68e-07	4.56916e-06	-0.0270964	2.27695e-06	-0.0271493
rs7167899	cg25385940	6.69e-07	1.20379e-06	-0.0157272	1.86597e-05	-0.0135156
rs2816625	cg10792982	6.71e-07	1.30273e-05	-0.0135302	9.86181e-07	-0.0143323
rs11993244	cg01466164	6.75e-07	4.70458e-06	-0.0145149	7.96493e-07	-0.0155878
rs9515247	cg01593787	6.83e-07	5.18753e-07	-0.0164793	8.02598e-07	-0.0157753
rs766887	cg13485126	6.89e-07	3.07366e-05	-0.022763	3.03008e-06	-0.023022
rs10863213	cg07179078	6.9e-07	8.87055e-06	-0.0140679	8.72268e-07	-0.0136703
rs4713755	cg10661734	6.91e-07	1.22205e-06	-0.0138761	9.52254e-06	-0.0130041
rs7530362	cg26312149	7.05e-07	9.6713e-07	0.0140706	3.04677e-08	0.0139716
rs960145	cg17707095	7.08e-07	2.34257e-07	-0.023934	3.07791e-08	-0.0200552
rs174576	cg21116783	7.1e-07	7.6579e-07	-0.0174114	0.000191048	-0.0119617
rs1636249	cg15247329	7.18e-07	2.41353e-06	0.0155195	3.46754e-06	0.0146032
rs4975593	cg08830157	7.23e-07	4.76416e-06	0.00785096	7.09287e-06	0.00611755
rs6910071	cg09666540	7.45e-07	1.0941e-06	0.0177306	4.34382e-07	0.0144578
rs308328	cg17066594	7.54e-07	2.26597e-06	-0.0176167	1.28537e-08	-0.0199068
rs888208	cg07382132	7.54e-07	2.11891e-06	0.00798609	2.70788e-05	0.0063844
rs4861749	cg05693910	7.64e-07	3.65263e-06	-0.0202883	2.72099e-08	-0.0210655
rs6589426	cg24647015	7.69e-07	8.17557e-06	0.00929854	9.50625e-08	0.010993
rs1250126	cg12414557	7.78e-07	5.46687e-07	0.0226947	5.26067e-05	0.0177818
rs3792511	cg08998950	7.78e-07	5.96363e-07	0.0234379	6.57063e-07	0.0216129
rs1470211	cg08998950	1.19e-05	5.26852e-06	-0.0188815	0.000213665	-0.0144115
rs4800192	cg20743280	7.86e-07	4.42577e-06	-0.0188599	0.00326824	-0.00987632
rs12866697	cg16275739	7.93e-07	2.4947e-06	0.00833735	4.7295e-06	0.00773669
rs1530952	cg23897927	7.94e-07	5.86952e-07	-0.0142564	2.98078e-06	-0.011742
rs42467	cg02251859	7.96e-07	5.76152e-07	-0.0385525	5.54069e-07	-0.0329434
rs9512468	cg03424663	8.03e-07	1.6139e-06	0.0143818	3.457e-05	0.0109651
rs12595195	cg02161701	8.09e-07	1.77272e-06	-0.0163989	9.48143e-06	-0.0135478
rs12883126	cg06835156	8.11e-07	6.40211e-07	-0.0238779	2.73682e-06	-0.0212595
rs1661068	cg02114288	8.18e-07	1.66126e-05	-0.0148987	1.47551e-06	-0.0162285
rs10408164	cg25773489	8.2e-07	2.73073e-07	-0.0251184	7.89016e-05	-0.0160923
rs6504833	cg25173405	8.23e-07	1.43589e-06	-0.0228984	2.5134e-09	-0.0265359
rs10838251	cg16977035	8.27e-07	3.38624e-06	0.00698716	4.66902e-06	0.00607894
rs3766178	cg11964810	8.34e-07	1.31932e-06	0.0113645	3.1678e-07	0.0113464
rs7547787	cg19912559	8.36e-07	4.76342e-07	-0.0175503	2.67169e-07	-0.0177945
rs17370615	cg26380756	8.52e-07	3.92158e-06	-0.0115084	2.25803e-05	-0.0102006
rs3782567	cg26955132	8.66e-07	5.45881e-06	0.0146259	3.02582e-08	0.0168709
rs6801636	cg22831314	8.73e-07	3.9558e-07	0.0166422	3.97245e-06	0.0120915
rs175057	cg15467112	8.77e-07	1.09588e-05	0.016125	1.84594e-06	0.0159123
rs4950524	cg13067553	8.85e-07	1.79986e-06	-0.00934033	6.7281e-06	-0.00838833
rs9341324	cg16292181	8.85e-07	4.94035e-07	0.0246482	3.46025e-09	0.0251502
rs7898632	cg23823660	8.86e-07	4.50683e-07	0.0173593	3.46044e-06	0.0149384
rs161936	cg10652637	8.88e-07	1.07062e-06	0.0140413	9.20245e-07	0.0136979
rs1431130	cg17546721	9.1e-07	3.16397e-06	0.017026	4.92e-07	0.0172994
rs1611710	cg24389386	9.12e-07	1.45568e-06	-0.0156298	1.47037e-07	-0.0150212
rs9750503	cg10845886	9.17e-07	1.21478e-05	-0.0299736	2.98739e-08	-0.0307742
rs12678154	cg01876435	9.2e-07	8.7551e-07	-0.0115363	8.55674e-07	-0.011471
rs11718498	cg12311082	9.24e-07	1.57618e-06	-0.0157078	2.87019e-06	-0.0151579
rs4077405	cg12085600	9.29e-07	6.83487e-06	0.0303278	6.77368e-07	0.0248438
rs2238114	cg01097940	9.34e-07	1.38709e-06	0.0205867	3.72202e-08	0.0163123
rs1542256	cg08993878	9.36e-07	6.20201e-07	-0.0185977	1.7062e-06	-0.0172623
rs11205435	cg25303772	9.37e-07	2.3883e-06	-0.0131021	2.54726e-06	-0.0128343
rs11838414	cg02874768	9.4e-07	1.28996e-06	-0.0148194	7.69189e-06	-0.0131149
rs3752109	cg22720790	9.54e-07	1.05803e-06	-0.0235082	1.51984e-07	-0.0242791
rs11255182	cg10983206	9.57e-07	2.79234e-06	0.0136044	1.05611e-05	0.0128858
rs4294976	cg02844866	9.75e-07	2.96043e-06	-0.0177295	2.51021e-05	-0.0134734
rs9386898	cg02872426	9.79e-07	1.49514e-06	-0.0125	3.45439e-06	-0.0101975
rs935480	cg04001941	1e-06	1.47146e-06	-0.0239453	6.20431e-06	-0.0174488
rs9386891	cg23021340	1.01e-06	4.59652e-06	-0.0136967	9.30195e-07	-0.0138957
rs10848844	cg06922599	1.03e-06	2.13927e-06	-0.0137604	3.52601e-06	-0.0128409
rs10061901	cg26090469	1.05e-06	1.28039e-05	-0.0157056	3.26252e-06	-0.0160538
rs11097415	cg22395490	1.05e-06	5.33724e-07	-0.0131666	3.48559e-06	-0.0116077
rs624244	cg07537739	1.07e-06	1.93155e-06	-0.0225822	0.000103694	-0.0143195
rs2427457	cg17221813	1.07e-06	2.34457e-07	0.0120831	3.90836e-07	0.010997
rs11848785	ch.14.71061373R	1.08e-06	6.51035e-07	-0.0193417	7.35838e-07	-0.0157124
rs591283	cg04518186	1.11e-06	1.22031e-06	-0.0151534	8.12422e-06	-0.0130637
rs10514710	cg17279458	1.13e-06	2.09315e-06	0.0168072	1.84915e-06	0.0152355
rs4851287	cg06150148	1.14e-06	1.12426e-05	0.0191564	2.14456e-07	0.0201362
rs2843127	cg11669283	1.15e-06	1.80669e-06	-0.010126	1.75388e-06	-0.0100743
rs411326	cg26793289	1.16e-06	1.97355e-05	-0.0105343	1.71012e-05	-0.0108181
rs1391520	cg22875332	1.16e-06	4.08025e-06	-0.011786	5.72632e-05	-0.00933456
rs4486225	cg26388668	1.17e-06	8.45886e-07	0.0158908	5.55599e-07	0.0143077
rs6960214	cg15041044	1.17e-06	3.53765e-07	0.0399147	1.00641e-06	0.0342357
rs11259844	cg13259177	1.17e-06	2.3561e-06	0.0338435	7.95765e-06	0.0300964
rs10000169	cg19162496	1.19e-06	2.4414e-06	0.0127362	5.20156e-06	0.0120019
rs4949008	cg21662478	1.2e-06	3.32533e-06	-0.0148703	2.13209e-07	-0.0158121
rs4719841	cg10085138	1.21e-06	2.20366e-06	0.0145443	9.46696e-08	0.0144647
rs4372050	cg19009323	1.21e-06	1.36959e-06	0.020328	5.13922e-07	0.0192541
rs7101374	cg26198807	1.23e-06	7.64483e-07	0.0156234	4.01534e-06	0.0146772
rs6459805	cg14178173	1.23e-06	6.77994e-07	-0.00805157	1.36042e-05	-0.00676851
rs925440	cg18132405	1.23e-06	1.44025e-06	0.0137407	1.90906e-05	0.0109555
rs4790522	cg09697259	1.24e-06	4.11529e-06	0.010629	7.43224e-07	0.0105666
rs302615	cg02372613	1.25e-06	7.73308e-06	-0.00956882	3.69481e-06	-0.00987301
rs16826443	cg13149736	1.25e-06	1.50424e-06	0.00998075	3.82823e-06	0.0097163
rs164861	cg02306798	1.27e-06	8.30701e-07	0.0179491	7.32445e-08	0.0179787
rs2084637	cg21585512	1.27e-06	5.43889e-07	-0.00939063	1.34887e-05	-0.00803751
rs4239638	cg24125901	1.27e-06	1.6474e-06	0.0291195	3.06198e-07	0.0304783
rs2181443	cg03448754	1.27e-06	1.73363e-05	0.017462	6.44206e-06	0.0167729
rs4852033	cg05570654	1.32e-06	7.41291e-06	-0.00849715	0.00055086	-0.00623147
rs7220116	cg00348244	1.34e-06	4.1337e-06	0.0314465	2.25442e-07	0.0275011
rs10265417	cg01224451	1.34e-06	2.84876e-07	-0.0175697	7.82235e-07	-0.0172295
rs1946053	cg20751398	1.35e-06	1.29099e-06	0.0149247	3.35922e-06	0.0131301
rs2096066	cg05977156	1.35e-06	7.03402e-07	-0.023879	8.4205e-05	-0.0153142
rs4802210	cg23489630	1.36e-06	2.06538e-06	0.0206362	1.18481e-08	0.0219073
rs2414161	cg22715398	1.36e-06	2.38868e-05	-0.0311483	4.54276e-05	-0.0293593
rs12538839	cg21361702	1.36e-06	2.43026e-06	-0.0103223	3.1431e-07	-0.011082
rs6699898	cg22502715	1.37e-06	2.30736e-06	-0.0192425	1.69415e-08	-0.0222433
rs6577046	cg17689702	1.37e-06	1.84581e-06	-0.0186858	5.05975e-06	-0.0146437
rs266858	cg13537487	1.38e-06	1.60777e-05	-0.0128521	7.66884e-06	-0.0133941
rs8057431	cg02844852	1.38e-06	6.81168e-06	-0.0071737	3.0362e-06	-0.00669902
rs3845358	cg08146483	1.38e-06	2.05672e-06	0.0296253	0.00015407	0.0178056
rs11050339	cg16818056	1.4e-06	6.19307e-06	-0.0198125	2.86131e-05	-0.0153165
rs6798742	cg09006292	1.4e-06	1.27723e-06	-0.0351425	7.84978e-07	-0.0264113
rs2042381	cg09750775	1.4e-06	1.79041e-06	0.0144267	6.89402e-07	0.0148377
rs1374021	cg07784793	1.41e-06	4.39424e-07	-0.0264172	1.78652e-08	-0.0244086
rs1105489	cg05767404	1.43e-06	6.59142e-07	-0.0109743	2.7784e-05	-0.00776296
rs3847985	cg17090968	1.44e-06	1.29458e-05	0.0153587	2.81973e-06	0.015646
rs6779465	cg15346242	1.45e-06	6.5305e-07	-0.0111485	1.73512e-05	-0.00953861
rs1415214	cg13682187	1.45e-06	2.02108e-06	0.0163344	2.575e-06	0.0155969
rs9482	cg24367957	1.46e-06	5.92826e-06	-0.0198002	8.7762e-08	-0.0202001
rs10914746	cg14037114	1.48e-06	6.65557e-06	0.00897552	5.16995e-06	0.00892851
rs12797899	cg08561079	1.5e-06	1.66233e-06	-0.0311377	2.89758e-06	-0.023821
rs3901356	cg04839616	1.52e-06	4.77015e-07	-0.0132756	7.69092e-06	-0.0118807
rs2941504	cg05616858	1.53e-06	8.40792e-07	0.0275955	4.52992e-06	0.0253676
rs731953	cg19495351	1.53e-06	2.49322e-06	0.016146	1.01339e-06	0.0156853
rs12048904	cg15686842	1.55e-06	1.11937e-06	-0.0153389	3.57489e-06	-0.0100345
rs11080562	cg07836661	1.58e-06	3.19694e-06	-0.00715753	6.0916e-06	-0.0069841
rs6502057	cg21880101	1.63e-06	1.45922e-05	0.0260082	1.04696e-06	0.0283733
rs835334	cg04682580	1.63e-06	9.02378e-07	-0.0206912	4.06488e-05	-0.0158501
rs12312710	cg10358780	1.63e-06	2.5158e-05	-0.0163623	4.31043e-06	-0.017569
rs2300211	cg10358780	3.66e-06	2.34188e-06	-0.0148667	3.31182e-07	-0.0157205
rs3823934	cg03456212	1.64e-06	1.78056e-06	0.01391	1.05055e-08	0.0143773
rs6781013	cg12362118	1.64e-06	3.09051e-08	-0.0392177	1.15504e-07	-0.036554
rs1348563	cg24326782	1.67e-06	4.81138e-06	0.0114818	6.73633e-06	0.0105749
rs227708	cg24806663	1.67e-06	4.98931e-06	-0.0124861	6.45735e-07	-0.0136102
rs12745769	cg12075498	1.68e-06	9.32574e-07	0.0152209	1.33909e-06	0.014584
rs1605389	cg22588275	1.69e-06	1.16955e-06	0.0186722	1.8538e-06	0.016792
rs1531540	cg03127127	1.72e-06	1.32156e-06	-0.00899608	2.84103e-06	-0.00826498
rs6559754	cg14139511	1.72e-06	3.55732e-07	0.0138908	2.88247e-06	0.0127464
rs868624	cg07367144	1.73e-06	2.69225e-06	0.0295194	9.12279e-05	0.0200129
rs12676956	cg14696926	1.74e-06	4.95741e-06	-0.0197284	3.55254e-07	-0.0198606
rs10213659	cg24814707	1.75e-06	2.94371e-06	-0.0377242	6.86663e-06	-0.0334081
rs851980	cg18745416	1.76e-06	7.36309e-06	-0.014757	8.71245e-06	-0.0136848
rs6838393	cg19113954	1.77e-06	2.72762e-06	-0.0189135	1.8446e-07	-0.0203713
rs1152966	cg23541923	1.78e-06	2.09752e-06	0.0116106	9.76941e-07	0.0118517
rs10207490	cg26638266	1.79e-06	1.19785e-06	0.0139195	5.91692e-05	0.0114172
rs1655296	cg04892437	1.79e-06	1.34222e-08	-0.0551406	2.16038e-08	-0.0512
rs13015810	cg08471173	1.8e-06	4.69023e-06	-0.0187139	1.77393e-08	-0.0171237
rs2069126	cg19695842	1.84e-06	9.40923e-06	-0.0195784	3.84968e-05	-0.0178553
rs5014622	cg15101392	1.86e-06	5.6463e-07	-0.0200211	4.66354e-07	-0.0180283
rs11188513	cg18054998	1.87e-06	9.23815e-07	0.0153995	1.45778e-07	0.0134126
rs33013	cg04186980	1.88e-06	2.97433e-06	-0.0191195	1.09422e-06	-0.0163955
rs11249756	cg00636942	1.88e-06	1.01083e-07	-0.0180895	1.71809e-09	-0.0196861
rs853774	cg04202267	1.89e-06	1.37704e-05	0.0106242	2.44456e-05	0.00869542
rs6467854	cg23387468	1.9e-06	5.6089e-06	-0.0171034	5.13381e-07	-0.0180777
rs10514853	cg24994504	1.91e-06	4.87979e-06	0.0200313	1.40301e-08	0.0208123
rs1933488	cg06080941	1.93e-06	5.93659e-06	-0.0216037	3.61861e-06	-0.0172832
rs17370615	cg01008680	1.93e-06	2.82087e-06	0.0143126	9.61644e-06	0.0132516
rs1465852	cg02134022	1.94e-06	6.63754e-06	0.0126352	0.000437628	0.00885185
rs4539564	cg00079375	1.98e-06	2.68383e-06	0.0123979	5.42651e-07	0.012709
rs944963	cg14737286	2.02e-06	1.23616e-06	0.0110029	1.90288e-05	0.00823942
rs9834762	cg22156128	2.02e-06	1.28339e-06	0.0295459	0.000318295	0.0165609
rs12979689	cg18225577	2.02e-06	2.75196e-06	-0.0225286	2.68257e-07	-0.0231662
rs1076188	cg24987604	2.02e-06	1.4981e-05	-0.00838126	4.48056e-05	-0.00761359
rs162562	cg02355081	2.03e-06	1.07928e-05	-0.0391447	0.000452727	-0.0227934
rs3112362	cg10624823	2.03e-06	8.37818e-06	-0.0125352	1.49873e-05	-0.0120664
rs1878759	cg23510089	2.03e-06	7.9934e-06	0.0155481	2.56678e-07	0.0160396
rs4938028	cg27289463	2.03e-06	9.37902e-07	-0.0199749	1.44043e-08	-0.0216883
rs1561843	cg05726764	2.03e-06	1.20058e-05	0.0143199	1.33457e-08	0.0159096
rs2387422	cg19384448	2.05e-06	1.30113e-06	-0.0194401	2.34604e-07	-0.019053
rs11160134	cg10340801	2.06e-06	2.95961e-06	0.0188425	2.84391e-06	0.0147298
rs3745920	cg21278102	2.06e-06	5.1499e-07	-0.0181554	1.31653e-06	-0.0157875
rs875741	cg25131818	2.06e-06	3.15956e-06	0.0106066	3.4169e-06	0.0108392
rs7870809	cg00121158	2.07e-06	3.20136e-06	0.00932967	1.9686e-06	0.00950673
rs8044982	cg02036364	2.07e-06	2.71688e-07	-0.00926432	3.05221e-05	-0.0070354
rs162562	cg19269093	2.09e-06	7.92574e-06	-0.0230532	0.000209762	-0.0158988
rs6119628	cg03833512	2.12e-06	2.80182e-07	-0.0176979	5.78861e-06	-0.0148181
rs4881399	cg06279296	2.18e-06	3.1983e-06	0.0140567	1.52106e-05	0.0131009
rs7633305	cg02748582	2.19e-06	7.30964e-06	-0.0127009	2.54959e-06	-0.012681
rs4948393	cg00510507	2.22e-06	3.56406e-06	0.0152721	1.37924e-09	0.0183491
rs7120548	cg10504702	2.22e-06	9.96405e-07	0.0110552	2.69819e-06	0.010558
rs4453265	cg19700658	2.22e-06	4.83616e-07	0.0096979	6.3814e-05	0.00681638
rs1275925	cg22284448	2.24e-06	2.63322e-06	0.0162612	1.46426e-05	0.0135836
rs12089989	cg26891210	2.26e-06	4.93624e-06	-0.0122776	1.00523e-07	-0.0137647
rs7118634	cg02474625	2.27e-06	1.37654e-06	0.0190501	2.59956e-05	0.0153045
rs7896093	cg06395652	2.28e-06	3.62659e-06	-0.015846	2.87646e-06	-0.0157311
rs10161263	cg11887234	2.31e-06	3.98718e-06	0.0259821	1.27292e-07	0.0234268
rs1603389	cg10486069	2.32e-06	2.12268e-06	-0.0188566	2.38039e-06	-0.0184982
rs2452	cg15098255	2.32e-06	1.09854e-05	0.0139854	2.79688e-06	0.0140724
rs6573020	cg18427465	2.34e-06	1.64473e-06	0.0120959	3.35455e-06	0.0111855
rs159853	cg27655214	2.35e-06	4.15887e-06	0.0104355	2.38779e-06	0.0102445
rs1181876	cg13558682	2.36e-06	3.82579e-06	0.0117341	4.93743e-05	0.00975888
rs287533	cg22797297	2.36e-06	3.24321e-06	0.0185216	6.82625e-07	0.0182432
rs11723316	cg17985608	2.38e-06	4.70719e-06	-0.012333	3.57669e-06	-0.0119278
rs877110	cg16138602	2.41e-06	9.16963e-07	0.0110342	1.35673e-05	0.00927421
rs12452527	cg20130018	2.42e-06	5.18601e-06	0.0141315	1.31787e-05	0.0132851
rs6994715	cg12847125	2.42e-06	9.90908e-06	0.0205614	4.99667e-06	0.020961
rs1492489	cg12462883	2.43e-06	2.35179e-06	0.0206542	2.89932e-07	0.0198256
rs8108434	cg20624953	2.47e-06	5.36261e-06	-0.0310663	9.42889e-06	-0.0234702
rs2241820	cg24896860	2.48e-06	2.7832e-06	0.0146222	2.20866e-05	0.0124743
rs3791426	cg14550559	2.53e-06	3.42576e-06	0.0237317	3.13696e-06	0.0235884
rs187411	cg22771603	2.55e-06	6.7023e-06	-0.00674827	9.75882e-06	-0.00660258
rs2282367	cg09936400	2.56e-06	2.29391e-05	0.0106233	5.87892e-05	0.00995097
rs4727160	cg05532669	2.58e-06	9.61505e-06	-0.00801917	6.38171e-06	-0.00824799
rs942876	cg20365566	2.58e-06	1.18797e-05	-0.012503	0.000397414	-0.0103526
rs9261743	cg13903409	2.59e-06	1.25092e-05	0.011415	1.02024e-06	0.0125621
rs10494316	cg17134153	2.6e-06	4.87491e-06	-0.0098823	5.39735e-05	-0.00772056
rs12879663	cg04245961	2.6e-06	1.8354e-05	-0.0120164	6.6324e-07	-0.012635
rs1105489	cg27573991	2.6e-06	1.83939e-06	-0.0107321	4.05506e-06	-0.00889619
rs1036385	cg04035553	2.6e-06	1.51689e-05	0.00657116	1.34952e-06	0.00618169
rs12501769	cg27207756	2.61e-06	8.75262e-07	0.0117865	6.15218e-07	0.0115748
rs3806113	cg08135965	2.63e-06	6.79246e-07	0.0108704	1.40769e-05	0.00972834
rs4873809	cg07777042	2.65e-06	8.79045e-07	-0.0162689	9.39648e-08	-0.0170865
rs4802562	cg10667338	2.66e-06	3.92311e-06	0.00968256	7.86405e-05	0.00715663
rs9892880	cg25364619	2.67e-06	7.63135e-06	0.0258918	2.1111e-07	0.0242972
rs6445860	cg23029041	2.67e-06	8.30327e-06	-0.0139602	2.90553e-05	-0.0116147
rs10494316	cg14833337	2.71e-06	9.35573e-07	-0.0139655	0.000122447	-0.0104805
rs2788865	cg25524530	2.73e-06	9.32851e-06	0.00881532	4.28707e-07	0.00957832
rs6578213	cg12667933	2.73e-06	7.33773e-06	-0.0264648	8.4245e-06	-0.0200927
rs6785366	cg01438868	2.74e-06	1.28229e-06	-0.0196975	1.49162e-06	-0.0181089
rs4908874	cg06348737	2.79e-06	4.98013e-06	0.012562	1.93754e-05	0.0119062
rs4301800	cg17586880	2.8e-06	5.60753e-06	0.0138344	0.000198694	0.0103748
rs222851	cg14616648	2.82e-06	2.52159e-06	0.0133803	6.35797e-06	0.0126696
rs3774729	cg16782675	2.82e-06	1.69928e-07	-0.0338045	0.000117118	-0.0214099
rs6577046	cg09244037	2.83e-06	1.25775e-06	-0.0351075	9.4994e-05	-0.0223541
rs1713976	cg03984758	2.83e-06	4.78485e-06	-0.0248706	4.99401e-05	-0.0187503
rs2049823	cg12638745	2.83e-06	2.05807e-05	-0.0135918	2.5668e-06	-0.0139341
rs10516156	cg12648074	2.85e-06	6.20242e-06	-0.0162176	2.76049e-06	-0.0156008
rs6313	cg06020661	2.88e-06	2.46444e-05	-0.009295	3.45133e-05	-0.00954006
rs903896	cg03315270	2.89e-06	2.38602e-06	0.0164887	4.51326e-06	0.0144087
rs4353229	cg24846397	2.92e-06	5.38081e-06	0.0136374	1.09248e-05	0.0134344
rs2074445	cg24340285	2.94e-06	1.5909e-06	0.0205216	3.25543e-05	0.0175453
rs1487753	cg12065800	2.94e-06	2.46164e-06	-0.0147006	2.3666e-06	-0.0119306
rs2856997	cg08905753	2.94e-06	6.94752e-06	-0.0159554	6.14072e-08	-0.0146094
rs7646083	cg06720722	2.96e-06	5.22467e-06	0.0126286	4.10546e-08	0.0138538
rs162562	cg20629455	2.96e-06	1.35589e-05	-0.0375595	0.000650146	-0.0235886
rs584462	cg09189538	2.98e-06	9.32173e-06	-0.0103576	1.60203e-07	-0.0115328
rs7904413	cg15115171	2.99e-06	4.41452e-07	0.0171704	1.6989e-07	0.0159488
rs241560	cg15946224	3e-06	6.18691e-06	0.0128439	1.55053e-05	0.0115786
rs4379922	cg15282973	3.04e-06	2.89619e-05	-0.00896395	1.19303e-05	-0.00884494
rs7547408	cg06642677	3.05e-06	1.25019e-05	-0.0133246	4.4836e-05	-0.0110958
rs6881736	cg09441164	3.05e-06	1.62371e-06	-0.01377	9.70606e-05	-0.0100382
rs11863903	cg04742550	3.08e-06	3.72654e-06	-0.02381	6.75974e-06	-0.019144
rs441827	cg24805411	3.08e-06	7.57116e-06	-0.00807578	0.00582372	-0.00304247
rs8105023	cg10393338	3.1e-06	2.34338e-06	-0.013619	1.91673e-05	-0.011992
rs9261484	cg11731221	3.1e-06	8.29872e-07	0.0240775	9.5919e-06	0.015233
rs4959352	cg14374089	3.14e-06	4.22006e-06	0.0131507	5.92185e-08	0.0129269
rs3858703	cg07813377	3.15e-06	2.50123e-06	-0.0174686	0.000326075	-0.0116113
rs1952692	cg13745402	3.15e-06	1.42332e-05	0.0181471	0.0015022	0.0108186
rs6806020	cg18348830	3.16e-06	6.66818e-06	0.0117281	1.41617e-06	0.011866
rs11718446	cg11279151	3.18e-06	8.05789e-06	0.0337976	0.000110018	0.0253666
rs1578743	cg09072322	3.2e-06	1.79944e-06	0.0197326	8.08523e-09	0.0157971
rs7939722	cg05448032	3.2e-06	1.15271e-06	-0.014428	5.90953e-09	-0.0155331
rs7013424	cg26718357	3.21e-06	1.91651e-05	0.00977569	6.47789e-05	0.0091117
rs2726588	cg06779553	3.28e-06	7.24507e-06	-0.0124786	7.45946e-06	-0.0121078
rs6537810	cg06789517	3.29e-06	2.15002e-05	-0.0159626	4.13516e-06	-0.0165933
rs983745	cg22161115	3.3e-06	1.06755e-06	-0.017973	3.9213e-07	-0.0167747
rs4678090	cg00984696	3.3e-06	1.8279e-06	0.00922985	0.00025266	0.0066597
rs6429800	cg21807065	3.31e-06	4.0165e-06	0.0143168	1.43434e-05	0.0135191
rs2366818	cg19622777	3.33e-06	1.44747e-06	0.0350014	0.00157539	0.0202029
rs4977303	cg13607993	3.35e-06	2.96163e-06	-0.0232708	0.000246215	-0.0157252
rs2242446	cg04811706	3.35e-06	4.26376e-06	0.0080872	1.75675e-05	0.007159
rs251373	cg01369220	3.35e-06	4.42013e-06	-0.0148569	1.85552e-07	-0.0161389
rs7798441	cg08311085	3.41e-06	1.8837e-05	-0.0145336	3.93692e-06	-0.0153498
rs7630511	cg16340446	3.42e-06	2.61077e-06	0.0147715	1.47858e-08	0.0152541
rs11080562	cg18176922	3.43e-06	4.15774e-06	-0.00785404	3.24366e-05	-0.00694575
rs2999504	cg24630419	3.44e-06	4.70834e-06	-0.0190065	0.00100821	-0.0117456
rs1330950	cg21727032	3.45e-06	4.29556e-06	0.016548	3.0232e-05	0.012217
rs6577046	cg00035980	3.47e-06	9.35761e-06	-0.016535	2.85757e-05	-0.0125816
rs1529835	cg24221919	3.48e-06	1.89149e-05	-0.0208169	2.37731e-05	-0.0182528
rs1451327	cg05655457	3.49e-06	1.34489e-05	0.0103141	3.91326e-06	0.0106423
rs17370615	cg19570171	3.49e-06	4.44093e-05	-0.00902155	2.62861e-05	-0.00884137
rs1454102	cg21667061	3.52e-06	2.46319e-05	-0.0152938	8.78669e-07	-0.0159514
rs880626	cg21667061	3.81e-06	2.01779e-05	-0.0164468	6.09219e-06	-0.0156948
rs10256396	cg22326328	3.52e-06	1.1533e-05	-0.0181492	6.71345e-06	-0.0162075
rs1904139	cg02291439	3.56e-06	3.07603e-06	-0.00858653	6.01162e-05	-0.0069866
rs872808	cg12091786	3.56e-06	9.53898e-06	0.00927836	2.02231e-05	0.00840261
rs6456098	cg09340511	3.57e-06	1.60772e-06	-0.0188109	1.38591e-06	-0.0150107
rs9355025	cg16335098	3.58e-06	3.66798e-06	-0.0201425	6.90011e-08	-0.0217715
rs1534599	cg22365225	3.61e-06	2.36065e-06	-0.0168	2.54541e-06	-0.0142465
rs472357	cg15064964	3.62e-06	5.73874e-06	0.0108719	3.36534e-05	0.00976035
rs11688439	cg15930703	3.62e-06	5.76421e-06	-0.0168999	7.55163e-07	-0.0166654
rs2296337	cg04770660	3.63e-06	3.37095e-05	0.0117561	8.08928e-07	0.0139753
rs10422527	cg23950597	3.65e-06	1.49749e-05	0.0114146	2.89463e-05	0.0111989
rs17524318	cg07888040	3.65e-06	8.35587e-06	-0.0158103	3.01691e-05	-0.0119445
rs3735814	cg12395012	3.66e-06	9.35714e-06	-0.0166425	2.07381e-05	-0.0158818
rs9530617	cg24456639	3.68e-06	2.7972e-06	-0.0103675	2.79044e-05	-0.00883053
rs9409948	cg00445475	3.69e-06	4.45437e-06	-0.0081733	1.03949e-05	-0.00727896
rs11054914	cg25165382	3.7e-06	9.15266e-07	-0.0138684	5.02814e-05	-0.0114033
rs2069347	cg08505883	3.71e-06	3.33611e-07	0.0145442	1.15989e-06	0.0125248
rs4148854	cg00092967	3.71e-06	7.79076e-05	0.00857066	2.5133e-06	0.00942561
rs2555036	cg24639100	3.71e-06	1.06831e-05	0.00919417	2.40809e-05	0.00829631
rs10904820	cg02774632	3.73e-06	5.94384e-07	0.0124645	3.71156e-07	0.01162
rs9357447	cg08652108	3.76e-06	5.31054e-06	0.00968425	1.86437e-06	0.0100829
rs2238069	cg16267263	3.77e-06	3.49112e-06	0.0323846	1.70451e-05	0.0242624
rs6125111	cg16599045	3.77e-06	0.000127071	0.00948391	1.69597e-05	0.0112162
rs475870	cg07231005	3.79e-06	4.88864e-05	-0.013765	3.34903e-06	-0.0145294
rs9267947	cg17755604	3.79e-06	4.17425e-05	0.0117362	2.1927e-05	0.0116483
rs7836805	cg26386464	3.82e-06	2.07023e-06	0.0166477	2.40156e-06	0.016298
rs951062	cg25401612	3.85e-06	3.68461e-06	-0.0148434	2.34068e-06	-0.0140763
rs10127656	cg26547924	3.85e-06	1.42564e-05	0.0195279	3.72292e-05	0.0192468
rs12525163	cg08161546	3.86e-06	4.49741e-06	-0.014194	1.22248e-05	-0.013308
rs17370615	cg25142308	3.87e-06	6.55357e-05	-0.0256773	1.60744e-05	-0.0260688
rs2757594	cg02369313	3.87e-06	9.88717e-06	0.00994888	4.28835e-06	0.010137
rs1264569	cg19321263	3.87e-06	1.49156e-05	0.0137353	2.6067e-05	0.0127034
rs4806767	cg25588792	3.87e-06	2.38715e-06	0.0129762	3.88689e-07	0.0140885
rs1528041	cg08391852	3.89e-06	2.59373e-06	-0.028355	0.000553135	-0.0161879
rs162562	cg26914927	3.93e-06	2.14784e-05	-0.0317929	0.000289696	-0.0218064
rs13174381	cg12951125	3.93e-06	3.00301e-06	0.0102041	8.02271e-05	0.00794913
rs309872	cg26306052	3.94e-06	3.82895e-06	-0.0189041	4.87201e-06	-0.0145185
rs11768083	cg02006203	3.98e-06	1.02272e-05	0.012874	3.55539e-05	0.0116672
rs1414681	cg26964636	4.01e-06	2.40577e-05	-0.0121372	6.79291e-07	-0.0139819
rs220346	cg26964636	5.44e-06	1.12143e-05	0.0126974	4.39746e-06	0.0130619
rs3927465	cg23913077	4.06e-06	3.67243e-06	-0.0141528	5.63801e-07	-0.0147787
rs10161263	cg01013630	4.07e-06	4.91312e-06	0.0295917	3.05306e-07	0.0251638
rs158777	cg08434574	4.07e-06	9.90647e-06	-0.0151357	0.000713101	-0.0104419
rs11207332	cg07810476	4.07e-06	1.92308e-05	0.0172298	5.72644e-07	0.0174518
rs422951	cg19155735	4.09e-06	2.61945e-05	-0.0139158	1.4136e-07	-0.0163629
rs7546545	cg19924025	4.09e-06	4.46916e-07	-0.0280043	5.94598e-05	-0.0217112
rs6727435	cg22059413	4.1e-06	5.24323e-06	-0.0210509	9.51401e-07	-0.0178511
rs2107613	cg17046247	4.11e-06	2.75136e-06	-0.0380334	0.00103844	-0.0196142
rs10916	cg15112952	4.23e-06	5.50203e-05	0.0163481	0.000269271	0.0134029
rs132675	cg20337753	4.25e-06	7.10107e-06	-0.0100272	2.06146e-05	-0.0084436
rs6737256	cg20638140	4.25e-06	4.50289e-06	-0.012126	7.41751e-05	-0.0102073
rs17370615	cg08371160	4.3e-06	4.00996e-05	-0.0100657	0.000118694	-0.00933409
rs10073556	cg27129755	4.3e-06	2.52295e-05	0.0164608	4.17305e-05	0.0149157
rs980272	cg25428293	4.31e-06	5.68156e-06	0.0103835	1.98307e-05	0.00918664
rs956730	cg16386158	4.32e-06	4.82035e-06	-0.021807	2.86776e-05	-0.016654
rs10944945	cg18090145	4.34e-06	3.67823e-06	0.0169313	6.54318e-06	0.0152966
rs7804019	cg17614582	4.38e-06	3.1937e-06	-0.0176335	8.71034e-06	-0.0153215
rs13354746	cg02573091	4.39e-06	6.8553e-06	-0.0177767	1.13543e-05	-0.0167685
rs10049588	cg03483035	4.42e-06	2.22432e-06	-0.0184615	1.34969e-05	-0.016577
rs9267947	cg13400512	4.43e-06	2.13132e-05	0.0108358	0.000728645	0.00772036
rs6953983	cg14719076	4.44e-06	4.27499e-06	-0.0138982	4.59528e-06	-0.0135972
rs17370615	cg26530502	4.46e-06	1.8133e-05	0.0098293	0.000129255	0.00872209
rs906148	cg10249074	4.47e-06	5.76434e-06	-0.0366118	1.69466e-07	-0.0321894
rs11595762	cg18593374	4.49e-06	1.55109e-05	-0.00913837	9.96659e-05	-0.00772994
rs4975684	cg14596589	4.55e-06	3.57265e-06	-0.00821975	2.04085e-05	-0.00660443
rs4599460	cg22368305	4.56e-06	3.22329e-05	-0.0278574	0.000203958	-0.0182827
rs2886070	cg22353551	4.6e-06	1.61735e-05	-0.0114619	0.000278233	-0.00885276
rs362249	cg00604193	4.63e-06	1.54973e-05	-0.0130441	1.11868e-05	-0.0134638
rs4397403	cg21471580	4.63e-06	4.77379e-06	-0.032064	7.16611e-08	-0.0353993
rs3737973	cg13781805	4.68e-06	4.01788e-05	-0.0112797	1.89363e-05	-0.0116911
rs6965685	cg19584649	4.71e-06	2.37607e-06	-0.00990879	2.85907e-07	-0.0105294
rs7078219	cg10506844	4.72e-06	9.97569e-06	-0.0151812	1.67756e-06	-0.0157263
rs10495041	cg23663428	4.75e-06	6.74969e-06	0.016291	1.32277e-06	0.0161198
rs12373373	cg02694925	4.75e-06	8.07863e-06	-0.0139602	3.95976e-07	-0.0132208
rs11769313	cg06724108	4.76e-06	5.2046e-06	0.012114	0.000147954	0.00908434
rs1671035	cg13564933	4.76e-06	2.6778e-05	0.0223585	1.53208e-05	0.0184118
rs2291258	cg02667335	4.79e-06	6.56645e-06	0.0227947	7.43322e-06	0.0164255
rs10217064	cg26953954	4.79e-06	6.89826e-06	-0.0229528	0.000925215	-0.0140902
rs227859	cg07066907	4.79e-06	7.63607e-06	0.0124896	0.000169392	0.0100413
rs12223186	cg09427644	4.81e-06	4.80324e-05	-0.0109842	0.000139108	-0.00983568
rs11209216	cg19865425	4.87e-06	0.000195315	-0.0110656	4.33653e-08	-0.0126289
rs311734	cg08049640	4.88e-06	3.88637e-06	-0.0172054	5.08146e-06	-0.0165605
rs7247108	cg25619184	4.88e-06	4.67345e-06	-0.0243843	3.79165e-12	-0.0158361
rs2290608	cg25381017	4.9e-06	3.41633e-06	-0.0130669	5.41619e-06	-0.0129742
rs398739	cg01258201	4.93e-06	1.40893e-05	0.0128709	0.00381704	0.00737533
rs11729056	cg03244277	4.94e-06	3.59726e-06	-0.0174958	2.48119e-08	-0.0161128
rs540524	cg06269299	4.96e-06	2.12361e-05	-0.013551	6.21117e-10	-0.0163747
rs2415020	cg08872353	4.98e-06	1.12771e-05	-0.010996	2.01063e-06	-0.0118616
rs12104272	cg18745184	5.04e-06	6.7697e-05	-0.00566607	6.76796e-05	-0.0055373
rs4849030	cg17762554	5.09e-06	1.28057e-06	0.0126069	1.58957e-05	0.011043
rs6426629	cg27395190	5.13e-06	7.60523e-06	-0.00573297	1.65384e-05	-0.00548011
rs2876257	cg08821937	5.13e-06	7.15209e-06	-0.0313745	1.40974e-06	-0.025408
rs11062613	cg17043230	5.14e-06	2.82649e-06	-0.0136355	2.09442e-05	-0.0119139
rs4268437	cg04718304	5.17e-06	7.11534e-06	-0.0129435	2.76718e-05	-0.0112061
rs7935184	cg16836250	5.17e-06	4.92616e-06	0.013785	1.5859e-06	0.013608
rs1144815	cg23226914	5.19e-06	5.38698e-05	-0.0105735	3.89698e-05	-0.010527
rs887466	cg18969004	5.24e-06	1.20557e-07	-0.0217209	0.000129434	-0.0153258
rs13101730	cg25614364	5.26e-06	2.87142e-05	0.0133868	0.000435673	0.0101944
rs2270541	cg01101782	5.26e-06	2.07862e-06	0.0248622	1.68113e-05	0.0206736
rs8115229	cg18949315	5.27e-06	2.42596e-06	0.0129957	1.54616e-05	0.0116798
rs7919591	cg04827919	5.28e-06	8.8927e-06	-0.0130641	6.71683e-05	-0.0111268
rs8042384	cg25904166	5.28e-06	5.991e-06	0.0113759	3.52762e-07	0.0122753
rs2107613	cg06081750	5.29e-06	3.1526e-06	-0.0184815	0.000241819	-0.012256
rs1243039	cg26877588	5.3e-06	3.13001e-06	-0.0348571	7.39659e-06	-0.0279189
rs2075748	cg18158015	5.31e-06	5.42456e-06	-0.0334726	5.25198e-07	-0.0316336
rs1127299	cg02947862	5.37e-06	5.4834e-06	0.0290047	0.000153702	0.0184799
rs3094165	cg24900542	5.38e-06	3.23385e-06	-0.00845545	6.70851e-07	-0.00886859
rs11766378	cg09991587	5.4e-06	1.58659e-05	0.0124786	8.60817e-06	0.0119087
rs640098	cg08458745	5.4e-06	7.39945e-05	0.00538189	4.89501e-05	0.00500324
rs4716598	cg04804604	5.41e-06	6.48922e-06	0.0316254	7.78168e-07	0.0247718
rs11930623	cg18085176	5.42e-06	1.105e-05	-0.00961156	2.93522e-06	-0.00930375
rs12357460	cg14930471	5.44e-06	1.03208e-05	-0.0108	8.33106e-06	-0.0101531
rs420897	cg13739485	5.46e-06	9.40772e-06	-0.00825537	6.57919e-06	-0.00902558
rs9450701	cg26132665	5.48e-06	1.72988e-05	0.0193469	1.12021e-05	0.0142483
rs10874468	cg15600915	5.51e-06	6.71407e-06	0.0144543	1.75837e-07	0.01554
rs516761	cg10626792	5.54e-06	5.24253e-07	-0.0122935	0.000291914	-0.00849236
rs896946	cg10810860	5.56e-06	4.98376e-05	0.0149381	6.63677e-05	0.0144038
rs4492784	cg26622537	5.57e-06	2.38121e-05	0.020464	0.000116734	0.0153535
rs7931399	cg26622537	7.66e-06	1.31611e-05	0.0224794	7.92235e-06	0.0188858
rs2703510	cg06789856	5.61e-06	7.80248e-06	0.00813685	1.78266e-06	0.00777637
rs3824897	cg26834418	5.62e-06	1.13608e-05	-0.0124303	8.12053e-06	-0.0120926
rs9343974	cg16253997	5.62e-06	1.6396e-05	0.00853875	3.57393e-05	0.00819259
rs11655031	cg21855910	5.63e-06	7.42023e-06	-0.00952728	2.32773e-05	-0.00839231
rs17370615	cg07985315	5.65e-06	8.34109e-05	-0.0133832	5.00476e-05	-0.013613
rs9088	cg13459303	5.66e-06	3.55741e-06	0.013849	1.70252e-06	0.0142067
rs301624	cg03738718	5.67e-06	2.85403e-05	0.0180502	1.2203e-05	0.0170397
rs729032	cg21752578	5.68e-06	3.58485e-06	-0.014913	3.78679e-07	-0.0145272
rs642495	cg04420335	5.68e-06	4.98627e-06	-0.017841	5.02777e-05	-0.0115997
rs6137005	cg12237948	5.69e-06	2.89005e-06	0.0133769	4.87888e-09	0.0133993
rs12855239	cg14118175	5.73e-06	4.69573e-06	0.0102305	0.000682278	0.00721531
rs3745450	cg27055083	5.76e-06	1.36555e-05	0.00967803	1.27152e-05	0.00920867
rs4676503	cg07405330	5.82e-06	9.12457e-06	-0.0155963	2.56709e-05	-0.0145117
rs2535327	cg23142900	5.83e-06	2.55255e-05	0.00787274	2.43338e-05	0.00774725
rs1470590	cg23427406	5.83e-06	8.76005e-06	-0.0109534	2.21308e-05	-0.0102652
rs6105921	cg15347961	5.83e-06	1.34617e-05	0.00964592	4.08044e-06	0.00994526
rs11185717	cg13587564	5.84e-06	1.78728e-05	-0.00990265	2.87727e-05	-0.00935484
rs2024585	cg18189591	5.86e-06	1.39658e-05	-0.0146333	4.16227e-05	-0.0124449
rs4670876	cg01412379	5.9e-06	1.00203e-05	0.0135604	1.05875e-05	0.0125564
rs2356437	cg08684893	5.95e-06	8.39859e-06	-0.0151697	4.8406e-05	-0.0133764
rs2819096	cg25562619	5.95e-06	1.10864e-05	0.0142828	9.33912e-07	0.0117334
rs11022589	cg27075800	5.96e-06	0.000138415	-0.0116836	3.39897e-07	-0.0154797
rs6878606	cg06974592	5.98e-06	1.17531e-05	-0.0111203	1.44057e-05	-0.0107392
rs6577046	cg16919971	5.98e-06	2.28804e-06	-0.0327432	3.55488e-05	-0.0209415
rs8066620	cg03255749	5.98e-06	2.56806e-05	0.0242924	3.74741e-07	0.0248141
rs8128050	cg22851299	6.01e-06	5.23553e-06	-0.0101204	5.21485e-06	-0.00993663
rs7718298	cg14758163	6.02e-06	9.51901e-06	0.0164	0.000568744	0.0105943
rs1532472	cg16638769	6.03e-06	1.70159e-05	-0.0146943	0.00275022	-0.00891238
rs2352930	cg16638769	7.72e-06	1.7301e-06	-0.0178643	0.000119824	-0.0124702
rs897604	cg18489755	6.03e-06	4.89947e-06	-0.0103426	0.000691645	-0.00696608
rs11101558	cg00857536	6.11e-06	3.44936e-06	-0.0114381	0.000496376	-0.0071727
rs7970893	cg00851732	6.14e-06	3.20584e-06	0.00914159	3.39111e-06	0.00857905
rs10110073	cg22273804	6.15e-06	1.0251e-05	0.0155117	6.5443e-06	0.0153235
rs1362104	cg21401263	6.15e-06	6.9183e-06	-0.0108894	0.000113373	-0.00794546
rs17370615	cg20012172	6.19e-06	2.09434e-05	-0.0133745	6.03053e-05	-0.0123553
rs6472207	cg11183445	6.19e-06	2.56588e-06	0.0154914	7.18146e-06	0.0144338
rs4799838	cg22707085	6.2e-06	8.03486e-06	0.0127328	2.20203e-06	0.0123417
rs6061373	cg01526189	6.24e-06	1.46283e-05	0.00994417	7.57886e-07	0.0112777
rs210134	cg07519485	6.25e-06	2.67737e-05	-0.00744372	1.96983e-05	-0.00666324
rs10495703	cg08123321	6.26e-06	4.57367e-06	-0.0125028	6.49472e-05	-0.0101818
rs10217074	cg13021857	6.26e-06	1.43631e-06	-0.0130787	0.00017327	-0.00993475
rs1802295	cg05532178	6.28e-06	1.09649e-05	0.010385	3.0894e-07	0.0105206
rs17241282	cg17360854	6.29e-06	8.56217e-06	-0.0177829	4.12148e-05	-0.01416
rs295129	cg06226703	6.32e-06	8.6349e-06	-0.0131341	0.00350229	-0.00749613
rs561261	cg11601913	6.35e-06	5.41125e-06	-0.0141602	7.26289e-05	-0.0124307
rs1568903	cg26132900	6.36e-06	8.60209e-06	0.0218727	9.13558e-07	0.0203825
rs2749592	cg19127909	6.36e-06	1.98689e-05	0.0196116	7.60231e-05	0.0164932
rs12166894	cg09246833	6.36e-06	2.89574e-06	0.00934357	3.62215e-06	0.00914647
rs244853	cg05256481	6.4e-06	5.24953e-06	0.0152787	1.01811e-05	0.0141167
rs1154386	cg23223755	6.43e-06	2.08766e-06	0.0211481	1.35809e-05	0.0177879
rs169737	cg26074430	6.48e-06	4.24126e-06	0.0147238	0.00104586	0.0089793
rs241561	cg14459059	6.5e-06	1.81075e-06	0.0143621	2.48817e-06	0.0123294
rs1563863	cg08373605	6.51e-06	4.2508e-05	-0.0107464	9.76294e-06	-0.0112975
rs211455	cg02452416	6.52e-06	2.67106e-05	0.0135961	3.93253e-05	0.0115513
rs2654189	cg15834952	6.52e-06	6.07399e-06	-0.00957988	1.42986e-05	-0.00880858
rs5766105	cg03779241	6.53e-06	4.3671e-06	0.0160758	0.000538647	0.0100716
rs317616	cg26059219	6.54e-06	2.83644e-06	0.0104874	5.85161e-06	0.00995959
rs931728	cg05175964	6.56e-06	4.75301e-06	0.00948455	0.000339427	0.00624544
rs4832972	cg24826020	6.57e-06	1.00947e-05	0.0108324	0.00122893	0.00660154
rs1344126	cg22589728	6.63e-06	1.18673e-05	0.0130591	0.000210815	0.00928224
rs12538839	cg18155226	6.64e-06	1.83602e-05	-0.00983502	7.92106e-06	-0.0098848
rs11922435	cg08875947	6.65e-06	3.30778e-06	-0.030889	8.19441e-05	-0.0194565
rs2395162	cg21293943	6.68e-06	7.67214e-06	0.0141351	2.94981e-06	0.0130412
rs6499882	cg01104250	6.68e-06	7.99528e-06	-0.0124363	2.15947e-06	-0.0115361
rs1887063	cg10198565	6.7e-06	4.91271e-05	-0.0224379	2.02881e-05	-0.0185835
rs1288369	cg11950754	6.71e-06	4.94802e-06	-0.00655173	6.1978e-06	-0.00608766
rs1997502	cg05874806	6.71e-06	1.21717e-05	0.00719525	0.000209929	0.00549887
rs3091242	cg26216857	6.72e-06	2.56243e-05	-0.0146299	1.35625e-05	-0.0115686
rs17815421	cg18708744	6.73e-06	1.20794e-05	-0.010521	0.000247858	-0.00851815
rs9960934	cg20506037	6.74e-06	1.26432e-05	0.00782939	2.42843e-06	0.00811406
rs1547629	cg13456106	6.74e-06	3.66858e-06	-0.0155627	4.71236e-06	-0.0154019
rs4792953	cg01612247	6.75e-06	1.13141e-05	0.0174941	5.79364e-06	0.0171673
rs2241883	cg01403320	6.76e-06	7.97934e-06	0.0119746	7.21792e-05	0.0106592
rs2294394	cg04932691	6.78e-06	8.68584e-06	0.019909	0.00034046	0.0105887
rs9787011	cg15522984	6.79e-06	7.78467e-06	0.0100265	8.73057e-05	0.00822064
rs12142130	cg13216303	6.79e-06	1.30298e-05	-0.00928854	1.18344e-05	-0.00929909
rs509063	cg01753270	6.8e-06	1.15441e-05	-0.0296939	8.71634e-08	-0.0294787
rs243034	cg08426369	6.84e-06	9.7538e-06	-0.0139634	6.36823e-07	-0.0141363
rs2837291	cg08795360	6.85e-06	1.1554e-05	0.0140241	0.000104123	0.0121101
rs2567506	cg27492584	6.89e-06	5.70828e-06	-0.00699393	0.000299325	-0.00453492
rs1327369	cg13845049	6.9e-06	8.04863e-06	-0.00949763	3.74427e-07	-0.0098497
rs849885	cg18966495	6.91e-06	7.66582e-06	-0.0251856	0.000178179	-0.0157344
rs1899039	cg02552189	6.92e-06	1.89243e-05	0.0218956	1.49826e-06	0.0223007
rs322812	cg08242859	6.93e-06	7.91378e-06	-0.00835223	0.006096	-0.00456527
rs17282181	cg14750757	6.94e-06	6.25859e-05	0.0112736	8.21757e-05	0.0108545
rs2124147	cg01753140	6.97e-06	1.32318e-05	-0.0247353	0.00148029	-0.0134463
rs10508076	cg23809442	7e-06	4.02425e-06	0.0213686	0.000135699	0.012795
rs196325	cg06765389	7.02e-06	0.000134176	-0.00812875	0.000237493	-0.00775903
rs17370615	cg16269048	7.04e-06	2.01034e-05	-0.0271724	1.34068e-05	-0.0253952
rs2119479	cg04052832	7.05e-06	6.78448e-06	0.0154189	3.55798e-05	0.0137777
rs10083027	cg15085883	7.05e-06	1.12794e-05	-0.0109722	9.31269e-06	-0.0108504
rs28370418	cg17270519	7.05e-06	8.35531e-06	-0.0131814	7.8055e-06	-0.0132474
rs2072026	cg15500907	7.07e-06	5.11858e-06	-0.0145942	1.04342e-06	-0.0152707
rs3734287	cg15500907	1.63e-05	2.96321e-05	0.0133676	7.40731e-06	0.014114
rs10161263	cg20592186	7.1e-06	1.00266e-05	0.0282863	6.65233e-07	0.0243759
rs7702150	cg14576733	7.1e-06	1.06364e-06	-0.0150954	6.10129e-06	-0.0136203
rs2021788	cg05955436	7.13e-06	1.3093e-05	0.011752	0.000111412	0.00837027
rs17224695	cg08875094	7.15e-06	8.60812e-06	0.0200682	0.000240506	0.0163426
rs4839748	cg08875094	1.23e-05	1.38394e-05	0.0169258	0.000140958	0.0146268
rs6798742	cg15342441	7.16e-06	1.92912e-06	-0.0345479	2.80443e-05	-0.0225429
rs4889425	cg10409860	7.18e-06	5.48621e-06	-0.0140599	3.69305e-05	-0.0126529
rs1711479	cg09197761	7.21e-06	9.96553e-06	-0.0195702	6.55989e-06	-0.0201368
rs6491232	cg07306605	7.22e-06	1.15149e-05	0.011513	8.6683e-05	0.0102504
rs28688444	cg26065836	7.23e-06	2.10816e-05	0.0220527	1.46114e-06	0.0213124
rs4878112	cg13985445	7.27e-06	8.40963e-05	0.0127573	0.000140469	0.010599
rs4872137	cg00472375	7.27e-06	6.22028e-06	-0.0174969	8.38687e-09	-0.013188
rs919740	cg13897374	7.29e-06	4.93458e-06	0.00715234	0.00154431	0.00422053
rs17289394	cg09394608	7.3e-06	1.73144e-05	0.0123494	1.0265e-06	0.0127384
rs4891826	cg26848442	7.31e-06	1.89749e-05	-0.0192397	0.000601975	-0.0126411
rs7808471	cg16770546	7.32e-06	1.37145e-05	0.0207334	3.84792e-06	0.0168661
rs10481157	cg16228380	7.33e-06	8.90983e-05	-0.0155115	6.03575e-06	-0.0169862
rs11665996	cg09686308	7.35e-06	3.47558e-06	0.0106084	1.05807e-05	0.0096277
rs2537777	cg18075287	7.38e-06	2.36449e-05	-0.00660753	6.12981e-06	-0.00711721
rs11080562	cg00145489	7.39e-06	9.75021e-06	-0.00889379	3.78013e-05	-0.00822231
rs7625947	cg22012981	7.41e-06	7.12154e-05	0.00698247	3.72734e-05	0.00699563
rs4905783	cg15963095	7.43e-06	4.66492e-06	-0.0132441	0.0017194	-0.00805977
rs7909299	cg26603656	7.44e-06	9.14006e-06	0.0127525	4.02547e-06	0.0116519
rs462769	cg02291561	7.46e-06	7.6438e-06	0.0121373	8.55215e-06	0.0125818
rs1123571	cg13804377	7.46e-06	1.66344e-05	-0.00745388	9.7447e-05	-0.00606333
rs10518234	cg05522011	7.46e-06	5.59028e-05	0.0215966	0.00044509	0.0170043
rs11670533	cg26851661	7.48e-06	3.7634e-06	0.00645942	3.52514e-06	0.00618637
rs2583435	cg26073542	7.49e-06	5.12195e-05	-0.00908714	5.74561e-06	-0.00987616
rs1856765	cg02221622	7.51e-06	1.6689e-05	0.0114612	2.64794e-06	0.0122806
rs4752541	cg08899523	7.51e-06	1.19582e-05	-0.00735593	0.00275836	-0.00460659
rs17370615	cg21053015	7.51e-06	1.25676e-05	-0.0166926	5.9974e-05	-0.0151435
rs1474464	cg06866553	7.52e-06	8.87837e-06	0.00757171	0.000223588	0.00571805
rs957404	cg01272393	7.53e-06	9.21424e-06	-0.011778	4.10184e-06	-0.011486
rs267916	ch.1.3571010R	7.58e-06	9.83675e-06	0.0291223	8.85916e-06	0.0264188
rs311734	cg26480745	7.6e-06	7.16042e-06	-0.0190645	1.3495e-05	-0.0179425
rs2688492	cg18535702	7.62e-06	2.34078e-05	0.0139572	1.89215e-05	0.0130705
rs7132154	cg26268125	7.62e-06	3.38943e-05	0.0304284	2.83968e-05	0.0258382
rs2030793	cg03830093	7.65e-06	1.58057e-05	-0.0159219	3.89604e-06	-0.0169822
rs3779149	cg17588800	7.66e-06	4.8913e-06	0.00666629	3.3556e-05	0.00583709
rs4340170	cg12020676	7.66e-06	8.74186e-06	0.0146511	2.48356e-05	0.0118499
rs1181876	cg26810690	7.69e-06	1.53623e-05	0.015692	5.24663e-05	0.0145476
rs2899485	ch.15.663480R	7.81e-06	1.20421e-05	-0.0255669	1.24646e-05	-0.0239066
rs191996	cg03294207	7.82e-06	3.56414e-05	-0.0111807	7.92618e-06	-0.0114392
rs10161263	cg15844785	7.83e-06	1.35065e-05	0.0283419	8.8759e-06	0.0229593
rs4674908	cg00392155	7.85e-06	1.09685e-05	0.0113662	1.36526e-05	0.0104788
rs11263687	cg20587188	7.85e-06	2.7845e-05	-0.0161712	9.63582e-05	-0.0141517
rs4244341	cg04215703	7.86e-06	2.49784e-05	0.0131102	0.000630511	0.0102111
rs1874790	cg09167705	7.9e-06	1.3685e-05	0.00939687	0.000125132	0.00810213
rs285696	cg13613853	7.95e-06	4.77753e-05	-0.0124016	5.52197e-05	-0.0113931
rs9536335	ch.13.52878677F	7.96e-06	3.90954e-05	-0.0377423	0.00150047	-0.0219621
rs4848725	cg14937492	8.01e-06	9.15632e-06	0.0199097	4.6253e-06	0.0200681
rs442203	cg03515980	8.01e-06	1.34553e-05	0.0152996	7.3428e-05	0.0138318
rs7989816	cg12418762	8.02e-06	0.000141896	-0.0106728	1.50415e-05	-0.0120306
rs411326	cg08590186	8.05e-06	8.33279e-05	-0.0108687	4.12382e-05	-0.011691
rs10932228	cg19154323	8.08e-06	6.58009e-05	-0.0126642	1.11734e-06	-0.0147456
rs2861911	cg13391675	8.08e-06	2.69679e-05	0.0112827	6.79326e-05	0.0104492
rs309539	cg21787873	8.1e-06	3.98783e-05	0.0140353	6.2073e-05	0.0138451
rs4963361	cg15581842	8.11e-06	6.86044e-06	-0.0133071	5.10116e-05	-0.0118123
rs6482743	cg03271907	8.15e-06	1.03258e-05	0.0128943	1.38115e-06	0.01351
rs4957114	cg26070865	8.15e-06	0.000150019	0.0209572	7.13009e-05	0.021295
rs7225574	cg04886672	8.15e-06	1.29926e-05	0.0169014	5.11086e-06	0.0152393
rs13249752	cg02919422	8.15e-06	3.7272e-05	-0.00844728	0.000205585	-0.00642788
rs11948648	cg25942450	8.19e-06	1.5778e-05	-0.00975458	3.79702e-05	-0.00772549
rs766778	cg08350549	8.2e-06	8.93559e-06	-0.0160774	4.66843e-07	-0.0158132
rs7833494	cg04153489	8.2e-06	3.59199e-06	0.00603503	4.3788e-06	0.0055618
rs10875612	cg00055771	8.22e-06	8.19326e-05	0.0131369	0.000104072	0.0119466
rs639847	cg09809672	8.27e-06	5.25985e-06	0.0083148	8.07232e-05	0.00682878
rs6429541	cg00162064	8.28e-06	4.35789e-05	0.0109299	2.30139e-05	0.0106378
rs10161263	cg20622834	8.29e-06	2.04294e-05	0.023676	3.49345e-06	0.0196548
rs10890160	cg06885757	8.31e-06	2.83383e-05	-0.00939048	1.9811e-05	-0.00818656
rs1782838	cg06173682	8.32e-06	1.26447e-06	0.0189963	0.000509634	0.0104296
rs4656206	cg15897921	8.34e-06	4.64935e-05	-0.012836	1.40979e-05	-0.0138018
rs1887063	cg11120874	8.36e-06	4.03877e-05	-0.0274381	3.21123e-05	-0.0206937
rs882610	cg24447095	8.38e-06	9.65841e-06	0.00931318	7.93928e-06	0.00856147
rs689902	cg24786174	8.4e-06	1.08875e-05	0.00597576	8.90075e-06	0.00557134
rs2269165	cg22624212	8.41e-06	7.66328e-06	0.0120628	2.08527e-05	0.0115028
rs2146662	cg07071379	8.43e-06	1.54671e-05	0.0139831	0.000156115	0.0117427
rs6930713	cg21368479	8.47e-06	6.81015e-06	-0.00927867	5.08833e-05	-0.00814906
rs9332466	cg10864200	8.5e-06	1.21942e-06	0.0196278	3.94954e-06	0.0176687
rs7376288	cg10864200	1.81e-05	1.68884e-06	-0.0183964	4.91721e-06	-0.0167437
rs5600	cg08788055	8.52e-06	3.0898e-06	-0.0126472	0.000184042	-0.0091015
rs1931745	cg01039092	8.53e-06	8.26056e-06	-0.0153562	7.18536e-06	-0.0148109
rs7711188	cg07228402	8.59e-06	4.9248e-06	0.0253654	1.62164e-05	0.0199038
rs4353357	cg12485044	8.6e-06	1.54169e-05	0.0319385	6.83345e-06	0.0317181
rs4546483	cg02123262	8.61e-06	7.46594e-06	0.0203491	1.25487e-05	0.0164163
rs2921722	cg16462462	8.61e-06	7.23864e-06	-0.0230016	0.000722028	-0.0150583
rs1894406	cg24594224	8.61e-06	2.33802e-05	-0.00680052	2.52356e-05	-0.00673539
rs7746692	cg09094473	8.66e-06	1.06209e-05	-0.0146104	0.000190414	-0.0112646
rs17201317	ch.8.104563527R	8.67e-06	6.71362e-06	-0.0337791	5.86911e-05	-0.0251052
rs2741108	cg07662864	8.67e-06	6.01678e-05	-0.0167144	1.5517e-05	-0.0176809
rs2221867	cg05293365	8.69e-06	3.86964e-06	0.0111957	4.3083e-06	0.0107995
rs9591989	cg10550033	8.74e-06	7.46938e-06	0.0175363	0.000200606	0.011048
rs10455270	cg17840539	8.76e-06	1.63249e-05	-0.0179553	6.68476e-06	-0.0159531
rs12412313	cg05714496	8.79e-06	9.22832e-06	0.0198093	6.82492e-06	0.018171
rs8069477	cg02954676	8.81e-06	6.36518e-06	-0.0127293	8.72617e-05	-0.0109106
rs13018263	cg04744156	8.83e-06	2.04126e-05	-0.014509	8.31508e-07	-0.0133296
rs4239638	cg01539269	8.83e-06	1.99193e-05	0.0260815	3.63423e-06	0.027841
rs4984943	cg10179297	8.89e-06	3.7473e-05	-0.00937189	7.12059e-06	-0.009092
rs6953261	cg01196268	8.9e-06	2.84442e-05	-0.0150526	3.50368e-05	-0.0138095
rs6457110	cg04983903	8.95e-06	1.10234e-05	0.00566864	4.40891e-06	0.00510981
rs1239334	cg23516451	8.96e-06	7.91624e-06	-0.0122597	3.74082e-05	-0.0105991
rs4501547	cg12750031	8.97e-06	2.71398e-05	-0.0112438	3.87469e-06	-0.0112499
rs2853668	cg07855874	8.98e-06	4.40788e-05	0.0140391	2.72652e-05	0.0141057
rs740237	cg06983765	9.01e-06	2.05577e-05	-0.0142812	3.1546e-06	-0.0152028
rs2209957	cg23540651	9.07e-06	1.22983e-05	-0.0150078	1.01038e-06	-0.014619
rs4131885	cg26837192	9.1e-06	5.02946e-05	-0.0108344	5.45945e-05	-0.0104321
rs7778237	cg00347863	9.12e-06	1.99907e-05	0.0111739	4.49528e-05	0.00970592
rs885267	cg17102495	9.13e-06	5.35117e-05	-0.00715183	0.000527677	-0.00408032
rs6707140	cg07780694	9.13e-06	2.77014e-05	0.0150515	1.94289e-06	0.0146952
rs3812831	cg22926686	9.15e-06	1.47788e-06	0.0146271	3.76019e-05	0.0112184
rs1051219	cg09861496	9.16e-06	1.21292e-05	0.0216885	8.19667e-07	0.0194067
rs2076594	cg06746829	9.17e-06	7.26911e-06	-0.0135184	5.03566e-06	-0.0101885
rs3212198	cg19717150	9.17e-06	3.96322e-05	0.0113827	0.00191968	0.0083811
rs1108755	cg23952644	9.17e-06	6.58977e-06	-0.0114398	3.39441e-05	-0.0098824
rs394199	cg22812331	9.19e-06	6.72666e-06	-0.0250658	0.000649949	-0.0167307
rs112314	cg26900259	9.2e-06	5.76106e-06	0.0121939	6.40723e-09	0.0109088
rs6780013	cg27129171	9.23e-06	0.000510493	-0.00613753	5.58138e-07	-0.00882571
rs1830651	cg07582845	9.24e-06	7.6042e-06	-0.008385	1.39969e-05	-0.00779931
rs2283492	cg02562761	9.26e-06	2.31463e-05	-0.0150506	4.25172e-05	-0.0154125
rs2498399	cg15969227	9.27e-06	1.32597e-05	-0.0174617	4.2161e-05	-0.016503
rs7622156	cg02700130	9.29e-06	0.000138143	-0.0100072	8.1658e-06	-0.0107714
rs6869702	cg08711547	9.34e-06	3.00143e-06	-0.0101086	1.4233e-05	-0.00870221
rs10076494	cg22807585	9.35e-06	4.00982e-06	-0.0273439	2.38125e-06	-0.0300926
rs2294478	cg12110846	9.35e-06	9.1055e-06	-0.0116024	3.171e-06	-0.0100059
rs738222	cg14466896	9.37e-06	3.9019e-05	-0.0101745	3.38793e-05	-0.0101211
rs1293764	cg23736843	9.37e-06	2.95879e-05	0.0180787	0.000106256	0.0155901
rs1043845	cg12806892	9.39e-06	1.87874e-05	0.0253848	4.4748e-05	0.0195924
rs12523505	cg25557227	9.39e-06	1.06448e-05	-0.028286	9.65604e-06	-0.0223866
rs10823627	cg09140723	9.4e-06	7.04872e-07	-0.017306	7.54752e-08	-0.0148113
rs200447	cg25370592	9.47e-06	8.59619e-06	-0.0099443	2.45902e-05	-0.00939437
rs1465522	cg02647406	9.47e-06	1.13404e-05	-0.0127177	0.000368918	-0.0096221
rs646464	cg02531227	9.57e-06	3.72422e-06	0.0196722	2.02022e-05	0.0176231
rs2562350	cg25333395	9.59e-06	4.91703e-05	-0.0106214	5.84747e-05	-0.010538
rs12591842	cg25887394	9.65e-06	2.87471e-06	0.0149685	2.84577e-05	0.0131897
rs1799722	cg01050076	9.66e-06	4.96151e-05	0.00933386	6.47451e-05	0.00877681
rs8105250	cg03344031	9.66e-06	1.20031e-05	-0.0183294	1.00499e-06	-0.0193866
rs1496726	cg08104146	9.69e-06	5.6328e-06	-0.0237088	3.88901e-06	-0.0206143
rs2589133	cg20758492	9.72e-06	6.10789e-06	-0.0100387	1.99379e-05	-0.00881069
rs4075205	cg00624939	9.73e-06	4.23073e-06	0.0192059	1.81191e-05	0.0149033
rs12498348	cg19453997	9.77e-06	7.08867e-05	0.0201965	7.78218e-05	0.0173736
rs9591989	cg19640779	9.8e-06	1.71319e-05	0.0142319	1.15439e-05	0.0142141
rs12446238	cg04010817	9.83e-06	7.34922e-06	0.0262038	0.00120347	0.0154437
rs2073900	cg11806945	9.86e-06	1.38433e-05	0.031037	2.99976e-06	0.0321524
rs4628217	cg23122650	9.86e-06	5.15627e-06	0.0198646	0.0001517	0.0151048
rs10818651	cg21469772	9.86e-06	2.88084e-05	-0.00720847	0.000707412	-0.0053145
rs6593807	cg22001782	9.87e-06	4.15587e-05	-0.0249292	0.00631304	-0.0121946
rs4714696	cg10049156	9.87e-06	2.98335e-06	-0.0362652	0.000172627	-0.0277226
rs12453746	cg20942162	9.88e-06	4.54359e-05	-0.0120174	0.000154772	-0.00919115
rs411326	cg27253757	9.88e-06	0.000242068	-0.012807	6.486e-06	-0.01528
rs12585725	cg07726423	9.9e-06	2.78453e-06	-0.0188619	1.15788e-05	-0.0155366
rs1888057	cg05116906	9.92e-06	1.69233e-05	0.0236685	1.07332e-05	0.0238042
rs7835769	cg24546463	9.93e-06	1.18443e-05	-0.0110725	4.87432e-05	-0.00973841
rs480575	cg04464122	9.99e-06	1.1721e-06	-0.0124393	2.86238e-07	-0.0122797
rs2420946	cg15049101	1.01e-05	1.77464e-05	0.0154343	9.28433e-06	0.0156864
rs7894492	cg07356745	1.01e-05	2.41227e-05	-0.0133997	2.27123e-07	-0.0144637
rs2419629	cg03254336	1.01e-05	3.1415e-05	0.00888851	1.26075e-05	0.00864819
rs139410	cg25632672	1.01e-05	7.34885e-05	-0.0054638	4.68223e-05	-0.0054573
rs4802602	cg13429145	1.02e-05	6.81924e-06	-0.0088213	0.000249086	-0.00749917
rs2969114	cg00090309	1.02e-05	1.30214e-05	0.00875406	2.89229e-05	0.00787982
rs6801636	cg22114979	1.02e-05	6.05311e-06	0.026952	0.00031516	0.015831
rs4839154	cg19518695	1.02e-05	4.69085e-06	-0.036096	1.38724e-05	-0.0261554
rs757454	cg03583050	1.03e-05	1.95942e-05	0.00736772	8.64665e-05	0.00633568
rs4624755	cg07752409	1.03e-05	5.22742e-06	-0.00993922	0.000326356	-0.00774584
rs357922	cg13807496	1.03e-05	1.53534e-05	-0.00799683	7.25319e-05	-0.00541605
rs11750173	cg18856388	1.03e-05	1.27091e-05	-0.0269631	0.020138	-0.00933119
rs2054608	cg26965236	1.03e-05	3.05498e-05	-0.020476	3.44698e-05	-0.0171532
rs2983478	cg14536194	1.04e-05	1.12277e-05	0.0121256	7.72769e-05	0.0100638
rs326057	cg10800865	1.04e-05	2.72715e-06	0.0213299	6.34044e-07	0.0194922
rs10775247	cg25009366	1.04e-05	5.00068e-05	-0.0221092	0.000106007	-0.0155906
rs3765736	cg07045089	1.04e-05	8.53717e-06	-0.0179107	7.0147e-05	-0.0158095
rs1108889	cg11878867	1.04e-05	2.18911e-05	-0.0112157	2.37801e-05	-0.0112704
rs11718446	cg21474964	1.04e-05	4.87234e-06	-0.0130216	0.00021373	-0.0103329
rs1867828	cg00714464	1.04e-05	0.00010104	-0.0159423	7.12856e-06	-0.0148263
rs1160305	cg24723561	1.05e-05	2.45539e-06	-0.00980033	3.91393e-05	-0.00804161
rs10910288	cg24723561	1.32e-05	4.451e-06	-0.0101379	6.4594e-05	-0.00832192
rs10161263	cg12411309	1.06e-05	1.68686e-05	0.0218198	3.00603e-07	0.0200727
rs9349417	cg20172563	1.06e-05	2.76401e-05	-0.0117015	3.34483e-05	-0.0109157
rs4128236	cg11607648	1.06e-05	2.10761e-05	-0.02425	0.000311705	-0.0156488
rs10957373	cg10895168	1.07e-05	3.20224e-05	0.0154914	0.000127038	0.0127127
rs9928856	cg10047845	1.07e-05	1.62243e-05	0.0126889	6.31678e-06	0.0129352
rs7214541	cg06219337	1.07e-05	3.61304e-05	-0.00922395	0.00226187	-0.00642932
rs2071556	cg09017117	1.08e-05	1.02892e-05	-0.0125898	5.79397e-05	-0.0105457
rs1922139	ch.10.1148322F	1.08e-05	1.58398e-05	0.0355559	0.000140045	0.0234066
rs11591441	cg25949033	1.08e-05	4.5378e-07	-0.0205642	2.92473e-05	-0.020408
rs1340376	cg04043334	1.1e-05	0.000580897	0.0123154	3.17564e-05	0.0147375
rs262453	cg05914894	1.1e-05	6.47284e-06	-0.0149622	1.80472e-07	-0.0153155
rs4773319	cg19199483	1.11e-05	1.20177e-05	-0.0106334	2.21851e-06	-0.0116506
rs4887111	cg04865220	1.11e-05	1.76649e-05	0.0113774	1.02636e-06	0.0110699
rs1541066	cg04189665	1.11e-05	2.4698e-05	-0.0214628	1.17592e-05	-0.018747
rs12221204	cg18758405	1.11e-05	5.3876e-06	-0.0178272	0.000440263	-0.0122819
rs10799662	cg14656657	1.11e-05	1.95395e-06	0.0121305	0.000164433	0.00869992
rs10160382	cg20000464	1.11e-05	4.32392e-06	-0.0196185	5.30357e-07	-0.0192703
rs9921147	cg27585878	1.12e-05	1.3788e-05	-0.0126554	8.02447e-07	-0.0142448
rs4711209	cg00599564	1.12e-05	3.89543e-05	0.0163173	0.000243299	0.0134636
rs666688	cg00258779	1.12e-05	1.63712e-05	0.0124271	0.000494977	0.00840523
rs11855722	cg01695279	1.12e-05	1.27178e-05	0.0115211	4.78214e-05	0.0104248
rs2366144	cg17708016	1.13e-05	2.01509e-05	-0.019531	0.000332403	-0.011369
rs7999481	cg10246520	1.13e-05	5.94512e-06	0.0107051	2.03308e-05	0.00874424
rs7751642	cg05371064	1.13e-05	0.000120907	-0.0383636	3.40939e-06	-0.0436152
rs1959121	cg22542859	1.14e-05	2.23645e-05	-0.0100763	6.69064e-06	-0.0106927
rs4927602	cg20971474	1.14e-05	3.94454e-05	-0.0166149	0.000141544	-0.0130932
rs4444401	cg09473315	1.15e-05	3.29166e-05	-0.0234137	0.00112678	-0.0167967
rs2621373	cg21171279	1.15e-05	3.94177e-05	-0.0151094	0.000203142	-0.0108238
rs3995498	cg04276894	1.15e-05	0.000104241	-0.0118853	3.24042e-05	-0.0118748
rs10752609	cg10317026	1.16e-05	2.38163e-05	0.010693	6.4514e-05	0.00905091
rs11078449	cg02228185	1.16e-05	1.56952e-05	-0.0176628	1.25241e-06	-0.0173313
rs11851031	cg15457718	1.16e-05	1.16636e-05	0.0299567	3.54336e-05	0.0229837
rs2375015	cg21167558	1.16e-05	6.13298e-06	0.0201652	1.52457e-05	0.0179326
rs2724506	cg14143723	1.16e-05	3.10928e-05	0.0192096	1.35915e-08	0.0208362
rs7945105	cg14488962	1.16e-05	4.19415e-05	-0.0114409	7.67592e-05	-0.0106703
rs6668857	cg02068538	1.16e-05	6.99966e-06	0.00974304	3.26043e-06	0.00976496
rs849063	cg20899053	1.17e-05	1.51877e-05	-0.0169673	0.00106347	-0.00933234
rs12487529	cg20035362	1.17e-05	3.66027e-05	0.0253164	2.42324e-06	0.0218645
rs4949632	cg21867608	1.17e-05	2.08696e-05	-0.0129602	3.42311e-07	-0.0146184
rs1543901	cg01308258	1.18e-05	1.3683e-05	-0.00647938	0.000201021	-0.00515133
rs551673	cg06236987	1.18e-05	1.54593e-06	0.0133731	1.08319e-05	0.0120491
rs4768698	cg21428710	1.18e-05	1.21152e-05	-0.00932989	1.11734e-05	-0.00929639
rs11198425	cg25043986	1.19e-05	6.34392e-06	-0.0163425	6.06521e-05	-0.014026
rs6758173	cg14017402	1.19e-05	1.52366e-06	-0.00940766	0.000132602	-0.00663927
rs9276913	cg11615303	1.19e-05	1.32229e-05	0.00943847	5.79027e-05	0.00849291
rs4366552	cg07347128	1.19e-05	1.69768e-05	0.0250269	1.76579e-05	0.0238166
rs7146	cg06547984	1.19e-05	1.39116e-05	-0.00882139	5.59072e-06	-0.00847502
rs10037969	cg05912079	1.19e-05	3.19119e-06	0.0108495	3.94117e-05	0.00904232
rs2526098	cg23580662	1.19e-05	1.87426e-05	0.018634	0.000208122	0.0140362
rs10838502	cg22287492	1.19e-05	1.08117e-05	-0.0111213	0.00308752	-0.0071161
rs7220116	cg20663846	1.2e-05	1.73731e-05	0.0238248	3.35985e-05	0.0186172
rs1528041	cg01806261	1.21e-05	9.52484e-06	-0.0279789	0.00310168	-0.0142852
rs8061995	cg04531202	1.21e-05	4.17981e-06	-0.00782095	8.90224e-05	-0.00632992
rs2267780	ch.16.9751610F	1.21e-05	3.49914e-05	0.00969235	0.000365701	0.00785679
rs4473785	cg15140258	1.21e-05	2.78693e-05	0.0155396	7.27092e-06	0.0136727
rs3135123	cg19739468	1.21e-05	1.76164e-05	-0.0257002	7.50949e-07	-0.0292033
rs12490985	cg24494008	1.21e-05	2.42209e-06	-0.0286763	0.000172466	-0.018224
rs401592	cg21512564	1.21e-05	2.15152e-05	-0.0279017	2.71548e-07	-0.0253819
rs3130696	cg09556042	1.22e-05	1.58194e-05	-0.0134695	0.000148222	-0.0120086
rs6828137	cg07409292	1.22e-05	3.4282e-05	0.00820008	1.03931e-05	0.00865891
rs4905528	cg06562570	1.22e-05	4.16298e-06	-0.00946159	8.36636e-05	-0.00800761
rs4380275	cg24104387	1.22e-05	1.53157e-05	0.0156541	1.89934e-06	0.0165785
rs6800812	cg07263372	1.23e-05	2.15103e-05	-0.0184309	0.000233037	-0.0136768
rs1036821	cg05838357	1.23e-05	1.48837e-05	-0.0122016	5.42453e-05	-0.0110372
rs11846699	cg19586116	1.23e-05	9.39318e-05	-0.0171011	1.71385e-06	-0.0183569
rs4684230	cg18038544	1.25e-05	1.02588e-05	0.0132332	0.000745219	0.0101584
rs2078535	cg07956515	1.25e-05	2.9185e-05	0.0155343	4.2296e-05	0.012229
rs1416764	cg00871019	1.26e-05	1.615e-05	0.0189371	1.74213e-06	0.0169796
rs9415986	cg04161859	1.26e-05	4.92682e-05	0.00631314	0.000247524	0.00536915
rs3850947	cg15414132	1.26e-05	3.90139e-05	0.0109348	2.41118e-05	0.0105607
rs828884	cg06226156	1.27e-05	8.69787e-05	-0.0112942	0.00127065	-0.00820482
rs2283088	cg04386614	1.28e-05	1.03987e-05	0.0109871	0.000498637	0.00864784
rs902968	cg02637843	1.28e-05	1.08083e-05	0.0101604	2.58211e-05	0.00972052
rs3130014	cg01680268	1.28e-05	3.47779e-05	-0.00898668	0.000334314	-0.00778252
rs294308	cg02914097	1.28e-05	4.6976e-05	0.00682746	8.4282e-05	0.00603839
rs647727	cg00735218	1.28e-05	8.68769e-06	-0.0131037	0.000228081	-0.0105162
rs1092688	cg15027563	1.28e-05	1.9995e-05	0.011995	0.000104912	0.0111675
rs4599460	cg06277849	1.28e-05	5.1131e-05	0.0289209	0.000281361	0.0184906
rs460126	cg14545975	1.28e-05	9.30727e-06	0.00595487	1.97617e-05	0.00466246
rs330941	cg05460571	1.28e-05	2.7608e-05	-0.00747421	1.10929e-05	-0.00755925
rs420897	cg14012599	1.29e-05	7.11525e-06	-0.00877644	7.096e-05	-0.00761766
rs2278872	cg12036365	1.29e-05	6.35654e-05	-0.0104817	8.48825e-06	-0.0114441
rs2135787	cg24705426	1.3e-05	1.02531e-05	-0.0255842	0.000323191	-0.017738
rs4854164	cg14356272	1.3e-05	9.12772e-06	-0.0181483	6.26885e-05	-0.0155389
rs4383344	cg25101327	1.3e-05	1.84098e-05	0.00730223	3.1756e-05	0.00706355
rs1169307	cg00949670	1.3e-05	2.18821e-05	0.00925666	3.94439e-05	0.00914468
rs12984214	cg23024448	1.3e-05	2.00857e-06	0.0149216	3.38092e-06	0.0130254
rs1823874	cg17886038	1.31e-05	1.8846e-05	-0.0104782	0.000330284	-0.00887738
rs2876257	cg09152866	1.31e-05	1.11653e-05	-0.0143832	3.80297e-05	-0.011869
rs2673164	cg23238677	1.31e-05	7.59312e-06	0.0170488	4.2057e-06	0.015338
rs6508055	cg03255741	1.31e-05	2.36299e-05	-0.0132734	0.000104695	-0.0118259
rs6552864	cg03080336	1.32e-05	2.34908e-05	0.0148156	3.7055e-07	0.0166283
rs10805262	cg10231500	1.32e-05	7.75694e-05	-0.0152418	3.6226e-05	-0.0158388
rs7115477	cg03268737	1.32e-05	9.13839e-06	-0.0163465	1.50603e-05	-0.0149395
rs1926317	cg07537530	1.32e-05	5.37322e-06	0.0147881	1.78002e-06	0.0134494
rs7311526	cg03723284	1.32e-05	1.0237e-05	-0.0118356	3.29502e-08	-0.0136597
rs952608	cg23246666	1.33e-05	5.16574e-05	-0.0287486	2.90279e-05	-0.0233708
rs17730621	cg21159940	1.33e-05	1.76756e-05	0.0203396	2.29935e-06	0.0173264
rs11986537	cg00401433	1.34e-05	1.06865e-05	0.0197483	0.000116687	0.0159718
rs1123862	cg02258920	1.34e-05	4.44033e-06	0.0162005	0.000120171	0.0134161
rs2076530	cg22425813	1.34e-05	6.92474e-05	-0.0149646	1.0822e-06	-0.0153942
rs927203	cg06974143	1.34e-05	3.64674e-05	0.00610061	0.000337374	0.00409259
rs2075863	cg21115691	1.34e-05	7.6504e-06	-0.0114281	0.000125006	-0.00861648
rs11724172	cg16865618	1.34e-05	1.88499e-05	0.0114355	0.00152086	0.00697715
rs4789817	cg11712217	1.34e-05	4.50881e-06	0.0098796	9.20234e-06	0.00941107
rs17681051	cg24451141	1.34e-05	1.28838e-05	0.013048	1.89081e-06	0.0135461
rs12004	cg03929205	1.34e-05	6.41785e-06	-0.00922	2.94468e-05	-0.00851399
rs11084882	cg20083497	1.35e-05	1.96884e-05	-0.0151478	1.0422e-05	-0.0153237
rs1621308	cg06559576	1.36e-05	3.28273e-05	0.0216513	4.97857e-06	0.0210619
rs2030534	cg22990726	1.36e-05	3.68422e-05	-0.0126039	4.33603e-06	-0.0139459
rs6576736	cg22488158	1.36e-05	1.83233e-05	-0.017654	4.59643e-05	-0.0158697
rs4689074	cg04283838	1.36e-05	9.13534e-05	-0.0119787	0.000474603	-0.00880553
rs4889242	cg07602072	1.36e-05	1.80959e-05	0.0104414	0.0001866	0.00884541
rs7838717	cg15151778	1.36e-05	3.83431e-05	-0.0132146	2.87672e-05	-0.0129933
rs11074601	cg11470399	1.36e-05	9.47964e-06	-0.00647954	1.69404e-05	-0.00626385
rs6923005	cg25133685	1.36e-05	1.00998e-05	-0.0152096	8.71912e-05	-0.0131516
rs2107613	cg17421331	1.37e-05	6.00464e-06	-0.0235947	0.00109951	-0.0140488
rs3851114	cg05471009	1.37e-05	1.26562e-05	-0.0101	6.43042e-06	-0.00990836
rs17395160	cg01517571	1.37e-05	1.39601e-05	0.0248078	2.08977e-07	0.0291317
rs2181839	cg00142036	1.37e-05	7.96633e-06	0.0144907	2.22639e-05	0.0128531
rs9927552	cg02521665	1.37e-05	8.59308e-06	0.0205903	0.000268625	0.0154848
rs11836262	cg05648964	1.37e-05	5.77385e-06	0.0211462	0.00112488	0.013851
rs11135762	cg03330710	1.37e-05	4.97676e-05	-0.00791991	6.17577e-06	-0.00756657
rs4247362	cg07840332	1.38e-05	4.74322e-05	0.00932732	5.25999e-05	0.0085727
rs7703230	cg00594167	1.38e-05	1.59366e-05	0.00996112	8.28503e-06	0.00957723
rs149425	cg27595489	1.38e-05	6.66555e-05	-0.0259216	0.00012035	-0.020334
rs4956405	ch.4.2608081R	1.38e-05	8.28255e-06	0.0278189	8.28003e-05	0.0230773
rs17690703	cg19832721	1.38e-05	1.20755e-05	-0.0133181	9.90119e-05	-0.0109109
rs7467137	cg01403030	1.39e-05	3.85667e-05	-0.0120354	1.73765e-05	-0.0126811
rs162562	cg15293422	1.39e-05	0.000198734	-0.018366	0.000652187	-0.0144954
rs4614	cg01985660	1.39e-05	1.05616e-05	-0.0162588	3.99085e-06	-0.0126641
rs11735307	cg17127235	1.39e-05	2.50143e-05	0.0146093	0.000761305	0.0114706
rs4663532	cg25591888	1.39e-05	4.55977e-06	0.00820006	0.000144535	0.00500428
rs2253801	cg18389931	1.4e-05	2.75576e-05	0.00703676	7.80186e-05	0.00616069
rs1105451	cg25810247	1.4e-05	2.77176e-05	0.0138118	6.86325e-06	0.0147162
rs6459338	cg14558358	1.4e-05	4.72129e-06	-0.0119552	1.10116e-05	-0.0114509
rs4697244	cg03271761	1.41e-05	1.85246e-05	0.00974294	1.5106e-05	0.0096495
rs7325678	cg05157360	1.41e-05	8.80006e-06	-0.0111453	9.98524e-06	-0.0107081
rs1829989	cg08296556	1.42e-05	5.64984e-06	-0.0077214	2.42882e-05	-0.00671715
rs4674039	cg02794963	1.42e-05	2.37114e-05	0.0188524	1.7838e-05	0.0177895
rs4485088	cg05817758	1.42e-05	1.10165e-05	0.00993919	0.000113656	0.00794375
rs2868932	cg19853194	1.42e-05	1.79749e-05	-0.0141868	1.67505e-05	-0.0143125
rs632678	cg18098053	1.43e-05	1.61886e-05	0.0291482	0.000299662	0.0205512
rs6825	cg05043794	1.43e-05	4.97023e-05	-0.00868484	3.23597e-05	-0.00856352
rs12610538	cg21051454	1.43e-05	1.95419e-05	-0.0104676	5.99692e-05	-0.00941997
rs803441	cg17140133	1.44e-05	0.000293759	-0.0109697	5.44996e-05	-0.0114193
rs4676870	cg20852250	1.45e-05	2.7641e-05	-0.0117535	0.0101957	-0.00514481
rs6844238	cg05264454	1.45e-05	9.24024e-05	0.00810162	9.62948e-06	0.00835296
rs469053	cg01806427	1.45e-05	3.98167e-05	0.013645	5.73984e-07	0.0144676
rs8071251	cg19828416	1.46e-05	1.04455e-05	-0.0258531	9.15132e-07	-0.0210185
rs6860842	cg06844454	1.46e-05	5.75514e-06	0.0190449	7.15426e-05	0.0132068
rs17469209	cg12048341	1.46e-05	2.86001e-05	0.0310499	0.000442208	0.0241501
rs11231286	cg13273340	1.46e-05	1.71042e-05	-0.00741975	6.46492e-05	-0.00630246
rs7585314	cg14261272	1.46e-05	1.78238e-05	-0.0148124	3.10626e-07	-0.0155576
rs843522	cg11488033	1.47e-05	4.69347e-05	-0.0103981	1.28677e-05	-0.0108642
rs2035481	cg08822215	1.47e-05	2.05843e-05	-0.0160021	1.77029e-05	-0.0158361
rs2910200	cg19619065	1.47e-05	4.37678e-06	0.0187451	8.70736e-07	0.0174652
rs2077847	cg13995568	1.48e-05	8.71758e-06	0.0131546	0.000130147	0.0113797
rs1181876	cg06543160	1.48e-05	5.77669e-05	0.00975631	4.23153e-06	0.0106847
rs4699913	cg10938600	1.48e-05	2.01005e-05	0.0108173	0.000168895	0.00921894
rs952037	cg03825010	1.48e-05	0.000136843	0.00951566	1.40544e-05	0.0107352
rs12637098	cg21023926	1.48e-05	9.32475e-06	-0.00936157	1.16466e-06	-0.00992783
rs904017	cg05412333	1.48e-05	9.56646e-06	-0.00954076	4.68167e-05	-0.00769121
rs2241407	cg05017226	1.49e-05	8.2814e-06	-0.0143253	0.000108969	-0.0113165
rs585991	cg04088773	1.5e-05	3.50587e-05	-0.0198667	0.000268396	-0.0109565
rs2896452	cg00994649	1.5e-05	3.39934e-05	-0.0131378	0.00429738	-0.00830928
rs9550221	cg10167785	1.5e-05	1.16301e-05	0.0117907	3.66276e-06	0.0124373
rs9860870	cg00323305	1.51e-05	1.63749e-05	-0.0371103	4.36394e-05	-0.0291588
rs4321739	cg23520478	1.51e-05	1.90631e-05	-0.0205878	1.56091e-05	-0.0169367
rs4917386	cg09541379	1.51e-05	2.61992e-05	0.020197	1.02524e-05	0.0209857
rs2241820	cg16474117	1.52e-05	8.68574e-06	0.0179244	4.4416e-05	0.0151991
rs10933553	cg19125081	1.52e-05	4.79861e-06	-0.019481	4.80758e-07	-0.0156402
rs10848315	cg21344159	1.53e-05	1.55649e-05	0.0136513	0.000429259	0.00978958
rs7132674	cg21747310	1.53e-05	2.77851e-05	-0.0117656	1.76797e-07	-0.0136143
rs9871274	cg23727321	1.54e-05	1.2466e-05	-0.0175241	0.000656556	-0.00969443
rs1075708	cg27232569	1.54e-05	1.21784e-05	-0.0143974	7.98782e-06	-0.0109355
rs9550221	cg10208284	1.54e-05	1.11493e-05	0.0148664	6.16573e-05	0.0137258
rs1860741	cg26407811	1.55e-05	2.99918e-05	0.009117	0.000132707	0.00822339
rs1390679	cg03108697	1.55e-05	4.03656e-06	-0.036794	1.02888e-07	-0.0343464
rs13016705	cg20196537	1.55e-05	2.35305e-05	-0.014527	8.83837e-06	-0.0148964
rs9859134	cg16236146	1.56e-05	3.27834e-05	-0.0122252	8.10272e-05	-0.0108727
rs1737481	cg22372668	1.56e-05	9.4937e-06	-0.010815	0.000186754	-0.00908825
rs3115570	cg24283019	1.56e-05	2.48614e-05	0.0120937	2.47112e-05	0.0102214
rs2298466	cg10892972	1.56e-05	2.47146e-05	-0.0157735	0.000142177	-0.0121411
rs9845648	cg17495555	1.56e-05	1.68847e-05	-0.0121342	0.000656992	-0.00756824
rs9267947	cg13036593	1.56e-05	3.41876e-05	0.0092577	1.33398e-05	0.00972132
rs2450203	cg20039163	1.56e-05	1.42872e-05	-0.0086981	1.8777e-05	-0.00824528
rs1711960	cg19899882	1.56e-05	2.14695e-05	-0.0155398	0.000170625	-0.0118827
rs160730	cg00621247	1.57e-05	4.61093e-05	-0.00866384	9.69437e-05	-0.00821001
rs12538839	cg11790979	1.57e-05	3.00227e-05	-0.00970319	6.64914e-06	-0.0103074
rs5007254	cg03295274	1.57e-05	1.40092e-05	0.0178095	8.8368e-06	0.0161032
rs2458634	cg04291888	1.57e-05	1.95497e-05	0.0206865	0.000224418	0.014898
rs5751341	cg20727362	1.57e-05	4.16657e-05	-0.00951957	3.26202e-05	-0.00944772
rs6798742	cg27516221	1.57e-05	5.41829e-06	-0.0303382	0.000836969	-0.0177169
rs7296736	cg27577720	1.58e-05	9.74204e-06	-0.0261227	1.91666e-06	-0.0231339
rs10849582	cg19471399	1.58e-05	2.75179e-05	-0.0227329	0.00105628	-0.0137887
rs8069699	cg21576525	1.58e-05	2.27437e-05	-0.0189144	3.42646e-05	-0.0152549
rs880275	cg01296593	1.58e-05	2.3431e-05	0.0136942	1.36389e-05	0.0134662
rs276947	cg01296593	1.84e-05	3.42974e-05	-0.0128211	8.32345e-06	-0.0132452
rs17370615	cg12836643	1.58e-05	9.43251e-05	0.00570383	4.82355e-06	0.00655735
rs6090223	cg00377953	1.58e-05	3.85198e-06	0.0111874	2.1383e-05	0.00990024
rs17135019	cg07044458	1.59e-05	9.24522e-05	0.0136516	0.000132798	0.0124893
rs8007000	cg16995290	1.59e-05	7.26334e-06	0.0149978	2.07628e-05	0.0142689
rs630145	cg12927990	1.59e-05	9.4376e-06	-0.0291029	0.00351923	-0.0156775
rs35217608	cg11118615	1.6e-05	1.03017e-05	-0.0124462	1.97985e-05	-0.0112012
rs1521886	cg10781510	1.6e-05	1.08908e-05	-0.0119484	0.000100833	-0.0102466
rs12474421	cg10781510	1.89e-05	1.02064e-05	0.0132513	2.03719e-05	0.0123926
rs9268220	cg14493742	1.6e-05	7.00849e-06	-0.0117792	1.10471e-05	-0.0105559
rs1869417	cg23855901	1.6e-05	2.94042e-05	-0.0148509	0.000740371	-0.0118486
rs4796491	cg25288085	1.6e-05	2.37869e-06	-0.0320063	3.01171e-05	-0.0275991
rs7256180	cg12014333	1.6e-05	1.59454e-05	-0.0175866	0.00438211	-0.0102186
rs11240465	cg24713653	1.61e-05	4.3896e-05	-0.017237	0.000403856	-0.0139941
rs990794	cg20802333	1.61e-05	7.25665e-05	-0.0300904	0.000173508	-0.02456
rs11080562	cg26185079	1.61e-05	1.24548e-05	0.0120104	4.68597e-06	0.0119289
rs4540292	cg04230397	1.61e-05	7.86157e-06	0.0143525	0.00120527	0.00956475
rs13152324	cg16607898	1.61e-05	1.62269e-05	0.00990801	0.000176365	0.00835457
rs468828	cg06976144	1.62e-05	3.81901e-05	-0.0115677	1.0562e-05	-0.0117698
rs13102358	cg19390329	1.62e-05	0.000107073	-0.0141843	9.41244e-06	-0.0148387
rs3129690	cg08996678	1.62e-05	4.98631e-05	-0.0102673	0.000190611	-0.00904473
rs11726392	cg19852958	1.62e-05	7.66513e-05	-0.0208627	0.0050658	-0.0114447
rs12887146	cg09339394	1.62e-05	0.00028918	-0.00648411	0.000119553	-0.00675863
rs12022162	cg06884882	1.62e-05	2.57244e-05	-0.0126088	0.0156645	-0.00621478
rs2883369	cg01173332	1.63e-05	1.28326e-05	0.0150926	0.000287365	0.0124512
rs6734792	cg02444987	1.63e-05	1.97588e-05	0.0154377	0.00375683	0.00700414
rs3925081	cg02944871	1.64e-05	7.62293e-06	0.0139564	5.5861e-06	0.0132491
rs603645	cg05953285	1.64e-05	6.49783e-06	0.0226141	9.72589e-05	0.0181745
rs1149602	cg03991848	1.64e-05	3.07496e-05	0.0132187	5.73234e-05	0.0116707
rs6091808	cg08927738	1.64e-05	1.23495e-05	-0.0155244	4.68632e-06	-0.01593
rs11136442	cg05873604	1.65e-05	1.70938e-05	0.00709322	0.000971652	0.00517948
rs622064	cg16126671	1.65e-05	6.68295e-06	0.0336305	0.000997161	0.0199897
rs12126555	cg03513464	1.65e-05	2.61388e-06	-0.00864189	1.64203e-05	-0.00695655
rs11598702	cg00035347	1.65e-05	0.000134063	-0.0113717	3.61725e-08	-0.0147613
rs7184123	cg07289133	1.65e-05	1.51579e-05	0.00854521	1.86691e-05	0.007954
rs12331100	cg06623474	1.66e-05	1.38189e-05	-0.0356668	0.000770438	-0.0245344
rs4921401	cg06907391	1.66e-05	3.88199e-06	0.0189096	0.000131015	0.0140526
rs956958	cg20443778	1.67e-05	3.96214e-05	0.025431	0.000215411	0.0181958
rs10793068	cg23327896	1.67e-05	5.14815e-06	-0.0189347	3.4773e-05	-0.0171673
rs17023204	cg19856241	1.67e-05	1.3279e-05	-0.0237285	0.00150903	-0.0126688
rs4246316	cg10504066	1.67e-05	5.35295e-06	-0.00688134	9.45168e-06	-0.00611657
rs1608849	cg17545933	1.67e-05	2.95604e-05	-0.0136246	0.0012884	-0.00893375
rs11783368	cg17963840	1.68e-05	3.95752e-05	-0.00763716	4.79956e-05	-0.00710217
rs4593926	cg18048370	1.68e-05	3.50232e-05	0.00724997	0.000186257	0.00618074
rs1133104	cg26340084	1.68e-05	1.41207e-05	-0.0141962	3.88429e-05	-0.0134567
rs887911	cg22995176	1.68e-05	0.000200242	0.0204685	1.17448e-05	0.023805
rs7315020	cg06495803	1.68e-05	1.54425e-05	0.0118723	0.000184114	0.00959019
rs6801636	cg20378687	1.69e-05	1.79286e-05	0.00915723	1.86523e-05	0.00895888
rs2483616	cg04834966	1.69e-05	0.000165505	-0.0164349	0.00128852	-0.0123073
rs7643746	cg07216436	1.69e-05	1.68598e-05	0.0162938	0.000118993	0.0124804
rs3935366	cg22360678	1.69e-05	3.02807e-05	-0.00684084	6.53558e-05	-0.00619804
rs13228646	cg03781084	1.7e-05	7.52614e-05	0.0105683	1.02879e-05	0.0114818
rs11559856	cg05852143	1.7e-05	2.1356e-06	-0.0136452	3.16999e-05	-0.0111659
rs4643485	cg00630775	1.7e-05	3.90903e-05	0.011496	0.000215092	0.00973714
rs3130931	cg08309069	1.7e-05	8.27026e-05	-0.0132106	4.14272e-05	-0.0131856
rs6502762	cg21533971	1.7e-05	1.33242e-05	0.0128305	5.766e-05	0.0111652
rs2069590	cg12118371	1.71e-05	1.62499e-05	0.0195776	2.10477e-05	0.0173631
rs17578859	cg13832045	1.71e-05	8.19765e-05	-0.011006	8.02485e-05	-0.0111716
rs10878247	cg01603095	1.71e-05	0.00010672	-0.00484354	1.84461e-05	-0.00516826
rs10837407	cg04803994	1.71e-05	5.10266e-05	-0.0146646	0.000104501	-0.0140147
rs2800266	cg21179305	1.71e-05	6.54965e-05	-0.0109254	8.07809e-05	-0.0104563
rs7535375	cg13677741	1.72e-05	2.39238e-05	0.0159688	2.94675e-07	0.0163055
rs2018310	cg10803098	1.72e-05	9.69256e-06	-0.0142282	0.00414292	-0.00864532
rs2946662	cg27192248	1.72e-05	1.62786e-05	-0.0117878	2.59951e-05	-0.011177
rs12187674	cg08934869	1.73e-05	1.23789e-05	-0.0206514	0.00202826	-0.0109645
rs9591989	cg09959790	1.73e-05	5.42079e-06	0.0150013	0.00018203	0.0113009
rs449250	cg21932983	1.73e-05	1.19409e-05	-0.00942987	1.39807e-05	-0.0092666
rs1577274	cg06481887	1.73e-05	2.75596e-05	0.0105093	1.58731e-06	0.011691
rs7068336	cg19894382	1.73e-05	1.67152e-05	0.0154135	0.000220462	0.0130713
rs1406275	cg06746492	1.74e-05	0.000188069	0.0255806	3.67295e-05	0.0252697
rs4968093	cg15660573	1.75e-05	5.05042e-05	-0.0086046	2.43657e-05	-0.00898968
rs843720	cg13006717	1.76e-05	1.67131e-05	0.0285171	7.43376e-05	0.0198806
rs3129223	cg17877920	1.76e-05	2.91464e-05	-0.0145913	2.94452e-05	-0.0143909
rs1235043	cg00866814	1.76e-05	2.97909e-05	-0.0097355	0.00134729	-0.00572453
rs2245830	cg20917943	1.76e-05	2.92418e-06	0.0177719	3.64468e-05	0.0135299
rs12187674	cg05479462	1.77e-05	2.73231e-05	-0.0233834	0.000445766	-0.0159447
rs734693	cg11948301	1.77e-05	2.56798e-05	-0.0140804	1.20291e-05	-0.014535
rs6891672	cg15221739	1.77e-05	0.000119924	-0.00892166	2.02864e-07	-0.011086
rs2224391	cg09085698	1.77e-05	6.2025e-05	0.0127847	0.000253229	0.010618
rs11924708	cg27418402	1.77e-05	1.57818e-05	0.0135167	2.73658e-05	0.0127358
rs599190	cg07781399	1.77e-05	1.56643e-05	0.0145849	0.00145731	0.00942257
rs394199	cg11279454	1.77e-05	9.55917e-06	-0.0237015	0.000191922	-0.0159721
rs4757292	cg02907374	1.78e-05	2.04935e-05	-0.0347693	0.000238099	-0.0303489
rs1127299	cg12885302	1.79e-05	2.33559e-05	0.0244967	0.000830339	0.0162282
rs529191	cg07187103	1.79e-05	1.65262e-06	-0.0100568	1.5571e-06	-0.0102209
rs9750952	cg06609498	1.79e-05	0.00012336	-0.0125708	1.44953e-05	-0.0143706
rs4802841	cg21111812	1.79e-05	1.56061e-05	-0.0114006	0.000214648	-0.00880396
rs6964	cg14517359	1.79e-05	0.000171206	-0.0168745	5.86701e-06	-0.0202606
rs1528041	cg03187411	1.8e-05	1.0945e-05	-0.0226524	0.00167834	-0.0122237
rs6583069	cg10536901	1.8e-05	1.11455e-06	-0.0285606	4.81286e-06	-0.0207193
rs2766581	cg15921239	1.8e-05	2.11412e-05	0.0151943	1.03398e-05	0.0141865
rs2730265	cg24883441	1.81e-05	4.6865e-05	0.0106724	8.00508e-05	0.0100412
rs4263662	cg25845323	1.81e-05	8.83467e-05	0.0105462	2.96866e-05	0.00949514
rs4507587	cg13644645	1.81e-05	3.19875e-05	-0.0137328	0.000434349	-0.0120795
rs397425	cg13033072	1.81e-05	6.23683e-05	-0.011113	9.88792e-05	-0.0094761
rs10508884	cg12793525	1.82e-05	2.00606e-05	-0.010013	0.000614925	-0.00789142
rs8060506	cg08466740	1.82e-05	1.37484e-05	-0.0233728	5.69888e-05	-0.0178982
rs9934223	cg05515034	1.82e-05	1.12421e-05	0.0150224	1.08745e-05	0.0151312
rs751729	cg01532284	1.83e-05	2.47743e-05	0.0131595	0.000240768	0.0105267
rs2694403	cg02490189	1.83e-05	1.75192e-05	-0.0174122	4.97741e-06	-0.0178991
rs2289863	cg25976451	1.83e-05	4.13059e-05	-0.0109062	1.88119e-05	-0.0111303
rs2922188	cg27440834	1.83e-05	4.48213e-05	-0.0128736	8.54389e-07	-0.0145046
rs10784885	cg24373760	1.84e-05	7.66954e-05	-0.0103557	0.000567046	-0.00963297
rs1011659	cg18338925	1.84e-05	5.66472e-05	-0.0292805	7.33373e-06	-0.0293553
rs2341242	cg13180105	1.85e-05	2.38629e-05	0.0137092	2.88193e-06	0.0162627
rs746731	cg09887862	1.85e-05	6.61607e-06	-0.0226809	0.000101277	-0.0188199
rs10839595	cg04997812	1.85e-05	1.18995e-05	-0.00993982	9.3669e-06	-0.00917609
rs2926362	cg27012908	1.85e-05	2.33782e-05	0.014108	4.95839e-06	0.0134551
rs6578213	cg06447952	1.85e-05	5.83057e-05	-0.0228132	0.000108035	-0.0173425
rs10490158	cg22641430	1.86e-05	7.12987e-06	-0.0193731	1.40237e-05	-0.0155866
rs6730025	cg10981275	1.86e-05	2.90381e-05	-0.0138584	0.000603261	-0.0108392
rs280224	cg15328328	1.86e-05	6.47117e-05	-0.0106105	1.55548e-05	-0.0112719
rs2832144	cg24753998	1.87e-05	3.09296e-06	0.0141906	3.17464e-06	0.0134301
rs1152653	cg11254426	1.87e-05	1.29528e-05	-0.0127417	0.000263012	-0.00972514
rs464918	cg12331505	1.87e-05	1.45022e-05	-0.0188643	1.30903e-05	-0.0159482
rs9382445	cg22753888	1.87e-05	1.27954e-05	0.0212588	7.42789e-06	0.0202007
rs4804633	cg26558790	1.88e-05	0.000107215	-0.00666224	8.05293e-06	-0.00739979
rs1388070	cg14225926	1.88e-05	1.88384e-05	0.0145902	0.000324182	0.0103726
rs3799380	cg14345882	1.89e-05	5.98796e-05	0.00826889	1.44646e-07	0.0110561
rs7559733	cg04943225	1.89e-05	4.28151e-05	0.00579591	0.000114183	0.00515187
rs3819309	cg02945266	1.89e-05	5.44058e-05	-0.0180384	1.13952e-05	-0.0179299
rs1425446	cg20910361	1.89e-05	1.24686e-05	-0.0324407	0.000281914	-0.0259757
rs870034	cg20734030	1.89e-05	2.0635e-05	0.0187385	0.000699968	0.0139047
rs11869096	cg13732302	1.89e-05	2.71629e-05	-0.0128217	3.19864e-07	-0.0145966
rs9864383	cg26315918	1.9e-05	2.46054e-05	-0.0139689	1.38517e-07	-0.0159954
rs2447027	cg25045228	1.9e-05	1.77264e-05	-0.0107805	1.22621e-05	-0.00984747
rs1727530	cg19911257	1.9e-05	0.000126973	-0.0215221	0.000168996	-0.0173467
rs11072793	cg16406281	1.9e-05	1.80965e-05	-0.0106622	6.32862e-05	-0.00977987
rs11074601	cg09977031	1.91e-05	1.82142e-05	-0.00634498	1.60606e-05	-0.00630491
rs4321739	cg13926347	1.91e-05	7.69423e-06	-0.0184258	2.52385e-05	-0.0150954
rs2238630	cg13634151	1.92e-05	2.66588e-05	-0.0141118	0.000237344	-0.0116583
rs7922014	cg11438428	1.92e-05	2.12714e-05	0.0080623	0.00023766	0.00624761
rs9893732	cg11465466	1.92e-05	2.77763e-05	-0.0152295	1.16594e-05	-0.0138158
rs6780013	cg13052625	1.92e-05	0.000111608	0.0114653	1.03905e-05	0.0120806
rs9577454	cg07026882	1.92e-05	1.85801e-05	0.0197138	6.59821e-05	0.0159273
rs10140359	cg13020868	1.92e-05	2.91741e-05	-0.0205281	2.39939e-08	-0.0227238
rs1896890	cg13583523	1.93e-05	1.42847e-05	0.0130594	0.00411127	0.00806021
rs4783968	cg09223516	1.93e-05	2.99681e-05	0.0100125	0.000380634	0.00813195
rs10000869	cg26741686	1.93e-05	3.14139e-05	0.0232783	0.00973861	0.013635
rs7603623	cg09294347	1.94e-05	0.000102605	-0.0101741	1.41071e-05	-0.0114125
rs10894124	cg14219124	1.94e-05	2.5763e-05	-0.0143477	0.0016699	-0.00869506
rs9634171	cg10452542	1.94e-05	1.88681e-05	0.0215337	0.000980868	0.0139037
rs2238630	cg04257377	1.95e-05	1.52495e-06	0.00975939	0.000134247	0.00765253
rs1362006	cg14733103	1.95e-05	6.25064e-05	0.0222955	7.02304e-05	0.0196235
rs2214569	cg00901138	1.95e-05	0.000126831	-0.0122184	4.00152e-05	-0.012646
rs12187268	cg18652453	1.95e-05	1.28208e-05	-0.011705	3.02503e-05	-0.0112802
rs2819513	cg08111158	1.96e-05	4.29548e-05	0.00880669	1.26496e-05	0.00861777
rs1979680	cg11155735	1.96e-05	0.000152292	-0.0119556	1.54116e-05	-0.0125401
rs268691	cg07743231	1.96e-05	8.84032e-06	0.0124995	0.000643633	0.00910473
rs6089848	cg13768360	1.97e-05	5.08233e-05	0.0196304	0.000208663	0.0147711
rs707312	cg22080027	1.97e-05	7.82212e-06	0.0199992	7.79044e-05	0.0160823
rs6959747	cg08164617	1.98e-05	2.63663e-05	0.0108579	3.34084e-06	0.0102633
rs2073741	cg26646411	1.98e-05	4.61101e-05	-0.0106998	0.000323538	-0.00928977
rs4902672	cg15364504	1.98e-05	2.39714e-05	0.00965017	1.32771e-05	0.00959982
rs17183896	cg15557457	1.98e-05	1.84082e-05	0.0311835	3.08834e-05	0.0231973
rs2270360	cg10165071	2e-05	9.38627e-06	-0.0443405	1.18364e-05	-0.0436411
rs134821	cg05248804	2.01e-05	8.24238e-05	0.0112964	2.10409e-05	0.0118672
rs2497585	cg01708427	2.01e-05	1.41058e-05	0.0128479	2.03917e-06	0.0133825
rs12873113	cg03427330	2.01e-05	2.01561e-05	-0.0133352	0.000458973	-0.00861496
rs2735076	cg19199204	2.01e-05	2.87736e-05	0.0135072	3.87997e-06	0.0141436
rs3117035	cg10537192	2.02e-05	5.18054e-05	0.00741892	0.000278148	0.00628204
rs1718969	cg17892629	2.02e-05	1.62749e-05	-0.0136969	8.46251e-06	-0.0138479
rs6606873	cg01334824	2.02e-05	4.86833e-07	-0.0158768	4.87737e-05	-0.0125208
rs1181876	cg06180630	2.03e-05	3.70747e-05	0.0150312	0.000342753	0.0131662
rs9925126	cg04029168	2.03e-05	2.9778e-05	0.0104961	0.00119703	0.00697706
rs210152	cg16562445	2.04e-05	1.58742e-05	-0.0443283	0.0298365	-0.00543427
rs11241198	cg07249274	2.04e-05	0.000144117	0.00985692	5.14723e-07	0.010562
rs1906404	cg07579107	2.05e-05	1.88252e-05	-0.0270631	6.30129e-06	-0.0277804
rs6578213	cg14780482	2.05e-05	1.33367e-05	-0.0110313	0.000406114	-0.00830116
rs7210851	cg02893619	2.05e-05	5.75003e-05	-0.0147477	0.000193518	-0.0114437
rs7113533	cg26247064	2.06e-05	2.89693e-06	0.0206496	3.91831e-05	0.0172876
rs4321739	cg01779903	2.06e-05	3.30242e-05	0.017402	0.000844426	0.0128908
rs10997716	cg27125304	2.06e-05	8.05427e-05	0.0345296	0.000672113	0.0225661
rs1182865	cg02611419	2.07e-05	5.13712e-05	-0.0154079	0.000143462	-0.0114606

## Sheet: Table S4
Table S4 - cis slope QTL SNPs present in GWAS catalogue
Table of SNP IDs associated with slope QTLs that were previoulsy reported in the GWAS catalogue along with the trait reported
Pubmed ID is for the original publication reporting the association from the GWAS catalogue
SNP ID	Pubmed ID	Disease/Trait
rs1010366	26969751	Systolic blood pressure
rs10160382	30595370	Systolic blood pressure
rs1036821	30578418	Systolic blood pressure
rs1036821	30578418	Pulse pressure
rs1036821	34594039	Height
rs1036821	34021172	Hip circumference adjusted for BMI
rs10914746	28437668	Venlafaxine response in generalised anxiety disorder (remitters vs non-remitters after 24 weeks)
rs11054914	32888494	Lymphocyte percentage of white cells
rs11054914	32888494	Neutrophil percentage of white cells
rs1123571	33547301	Serum alkaline phosphatase levels
rs1133104	29855589	Velopharyngeal dysfunction
rs11635675	32203549	Triglyceride levels
rs11635675	32154731	Triglyceride levels
rs11635675	34594039	Triglycerides
rs11768083	23823483	Metabolite levels
rs12004	30504769	Gallstone disease
rs12412313	30578418	Pulse pressure
rs12446238	33414549	Cognitive aspects of educational attainment
rs12446238	30038396	Cognitive performance
rs12903325	34594039	Basophil count
rs12938031	29942085	Depressed affect
rs12938031	31676860	Brain region volumes
rs12938031	29844566	General cognitive ability
rs12938031	30867560	General factor of neuroticism
rs13146272	29083408	Low density lipoprotein cholesterol levels
rs13146272	29083408	Low density lipoprotein cholesterol levels
rs13354746	34594039	Myocardial infarction
rs1534599	34446935	Externalizing behaviour (multivariate analysis)
rs1635291	31998841	Alcohol consumption (heavy vs. light/non-drinkers)
rs1724425	30867560	General factor of neuroticism
rs17351243	25200001	Acute anterior uveitis (with or without ankylosing spondylitis)
rs174576	26068415	Glycerophospholipid levels
rs174576	25646338	Trans fatty acid levels
rs174576	31636271	Serum metabolite levels
rs174576	31636271	Serum metabolite levels (CMS)
rs174576	29545352	Serum metabolite ratios in chronic kidney disease
rs174576	32888493	Platelet count
rs1800759	32778093	Protein quantitative trait loci (liver)
rs1800759	33547301	Aspartate aminotransferase levels
rs1800759	33547301	Serum alkaline phosphatase levels
rs1802295	21874001	Type 2 diabetes
rs1933488	29892016	Prostate cancer
rs1933488	23535732	Prostate cancer
rs1997502	30595370	Eosinophil counts
rs2042381	32778093	Protein quantitative trait loci (liver)
rs2069126	30944420	Trunk fat mass adjusted for trunk lean mass
rs2069590	22179738	Gout
rs2076530	22936702	Sarcoidosis
rs2084637	26089329	Stroke
rs210134	26805783	Platelet count
rs210134	22423221	Platelet count
rs210152	26198764	Schizophrenia
rs210152	30285260	Schizophrenia
rs2241883	29875488	Blood protein levels
rs2241883	33547301	Alanine aminotransferase levels
rs2251746	18846228	IgE levels
rs2289863	32203549	HDL cholesterol levels
rs2290608	32888494	Eosinophil percentage of white cells
rs2420936	30584014	Voxel-wise structural brain imaging measurements in Alzheimer‚Äôs disease
rs2420946	23544012	Breast cancer in BRCA2 mutation carriers
rs242557	29892015	Atrial fibrillation
rs242557	31059154	Progressive supranuclear palsy
rs242557	34021172	Hip circumference adjusted for BMI
rs2535392	32888493	Lymphocyte counts
rs2535392	32888494	White blood cell count
rs2654189	32888494	Eosinophil percentage of white cells
rs2654189	32888494	Eosinophil counts
rs26899	29781551	Axial length or spherical error (univariate decomposition analysis)
rs2856997	34021172	Hip circumference adjusted for BMI
rs3091242	21700265	Erythrocyte sedimentation rate
rs3130304	34021172	Hip circumference adjusted for BMI
rs3130931	21801394	Drug-induced Stevens-Johnson syndrome or toxic epidermal necrolysis (SJS/TEN)
rs3130931	32541925	Type 2 diabetes
rs3131854	34469753	Lymphocyte counts
rs3212198	34594039	Serum uric acid levels
rs330941	34021172	Waist circumference adjusted for body mass index
rs330941	34021172	Waist-hip index
rs330941	34021172	A body shape index
rs3735814	29912962	Systolic blood pressure x alcohol consumption interaction (2df test)
rs3799380	29942085	Depression
rs3812831	26198764	Schizophrenia
rs394199	26920376	Multiple sclerosis and systolic blood pressure (pleiotropy)
rs397020	19010793	Multiple sclerosis
rs411326	34469753	Neutrophil-to-lymphocyte ratio
rs4148324	26148204	Bilirubin levels in tenofovir-treated HIV infection
rs422951	32771030	Systemic lupus erythematosus
rs4380275	23648065	Adverse response to chemotherapy (neutropenia/leucopenia) (doxorubicin)
rs4643485	34021172	Hip circumference adjusted for BMI
rs4678090	30038396	Cognitive performance (MTAG)
rs4699913	30038396	Highest math class taken
rs4719841	28334899	Triglyceride levels
rs4719841	32888493	Platelet count
rs4768698	30531825	Blond vs. brown/black hair color
rs4792953	30595370	Height
rs4799088	20801717	Amyotrophic lateral sclerosis
rs4845624	34107879	White blood cell count (monocyte)
rs4845624	32888493	Monocyte count
rs490633	32888493	Hematocrit
rs4959352	33888516	Haemorrhoidal disease
rs540524	34059833	Glycated hemoglobin levels
rs540524	34059833	Fasting glucose
rs6119628	32352494	Spherical equivalent
rs6119628	32888493	Platelet count
rs6119628	34021172	Hip circumference adjusted for BMI
rs6119628	34021172	Hip circumference adjusted for BMI
rs624244	30643258	General risk tolerance (MTAG)
rs624244	30643258	Risk-taking tendency (4-domain principal component model)
rs6559754	34021172	Hip circumference adjusted for BMI
rs6573020	32888494	Eosinophil percentage of white cells
rs6573020	32888493	Eosinophil counts
rs6573020	32888493	Eosinophil counts
rs661171	30134803	Plasma parathyroid hormone levels
rs7078219	23064961	Dental caries
rs7120548	31879980	Hypertension
rs7120548	34560273	Cortical surface area
rs7309	29186694	Cognitive ability (MTAG)
rs7309	25201988	Educational attainment
rs7309	30038396	Educational attainment (years of education)
rs738222	30019117	Adolescent idiopathic scoliosis
rs7405640	34021172	Hip circumference adjusted for BMI
rs7590255	28232668	Nonsyndromic cleft lip with cleft palate
rs7779057	23151678	Serum tamsulosin hydrochloride concentration
rs7838717	28886342	Dupuytrens disease
rs8066620	30595370	Heel bone mineral density
rs8066620	30598549	Heel bone mineral density
rs8066620	32888494	Plateletcrit
rs8066620	32888493	Platelet count
rs8066620	32888494	Platelet distribution width
rs851980	30172743	Bone mineral density (spine)
rs875741	27863252	High light scatter reticulocyte count
rs875741	27863252	High light scatter reticulocyte percentage of red cells
rs875741	29403010	Mean corpuscular volume
rs875741	32888493	Mean corpuscular volume
rs875741	32888493	Mean corpuscular hemoglobin
rs875741	32888493	Mean corpuscular volume
rs875741	32888493	Mean corpuscular volume
rs875741	32888494	Mean corpuscular volume
rs875741	30595370	Mean corpuscular hemoglobin
rs888208	34594039	Mean corpuscular hemoglobin
rs9112	31676860	Brain region volumes
rs9112	34560273	Cortical thickness
rs9112	34560273	Cortical surface area
rs9261484	31701892	Parkinsons disease or first degree relation to individual with Parkinsons disease
rs9318552	24376456	Diastolic blood pressure (alcohol consumption interaction)
rs9332466	33169155	Schizophrenia
rs9382445	30846698	Sleep duration
rs960145	31043756	Bipolar I disorder
rs9750952	30575882	Waist-to-hip ratio adjusted for BMI
rs9750952	30575882	Waist-hip ratio

## Sheet: Table S5
Table S5 - trans slope QTLs
Table of the lead SNP CpG pairs for each independent cis slope-QTL uncovered in the LBC cohort.
The P-value of the association and Benjamini Hochberg corrected FDR are both given.
The effect size is given as change in slope per allele
SNP ID	CpG probe ID	P-value	FDR	Beta	Effect size (Beta)
rs10896271	cg03187668	5.76237e-13	0.0014503	-0.00469283	-7.36848
rs12933229	cg03969070	2.02738e-12	0.00389654	-0.0026339	-7.18364
rs12933229	cg02201215	2.22309e-12	0.00412277	-0.00218028	-7.16995
rs17370615	cg20883310	4.56654e-12	0.00731391	0.00169513	7.06226
rs3773967	cg00492269	5.70523e-12	0.00886891	-0.00232113	-7.02869
rs160641	cg03233332	5.95619e-12	0.00912486	0.00434759	7.02219
rs4792831	cg09385632	2.15581e-11	0.0261937	-0.00147811	-6.82544
rs17370615	cg13444243	3.20725e-11	0.0347621	0.00419639	6.76375
rs930978	cg17815049	3.22274e-11	0.0347621	0.00417708	6.76299

## Sheet: Table S6
Table S6 - Analysis of TF binding sites associated with slope QTL CpGs
Table of TF binding site counts at slope QTL CpGs
TF binding sites were taken from ENCODE GM12878 hg38 data from the TF clusters annotation
The folowing proteins were removed from the analysis as they are general chromatin factors rather than site specific TFs:
POLR2A, ARID3A, RAD21, EZH2, SUZ12, HDAC6, SIN3A, HDAC2, BMI1, CBX3, KDM1A, ASH2L, EP300, SMC3, CBX5, CBX3, KAT2A
The background was all CpGs present on the array that were included in the analysis to find slope QTLs
P-value from Fisher's exact tests and adjusted p-value is Benjami Hochberg adjusted p-value
	Counts		Percentage
TF	Background	Slope QTLs	Background	Slope QTLs	% Difference	P-value	Adjusted P-value
CREM	40674	76	0.117591	0.0521978	-0.0653928	1.62455e-17	3.30325e-16
BRCA1	4391	12	0.0126946	0.00824176	-0.00445285	0.157032	0.182456
PKNOX1	34232	86	0.0989664	0.0590659	-0.0399005	7.03774e-08	2.25949e-07
SMARCA5	22269	40	0.0643808	0.0274725	-0.0369083	2.65706e-10	1.2006e-09
E2F8	15531	28	0.0449009	0.0192308	-0.0256701	2.19617e-07	5.97582e-07
MXI1	52868	111	0.152844	0.0762363	-0.0766078	1.45663e-18	5.24921e-17
RFX5	15283	34	0.0441839	0.0233516	-0.0208323	3.88384e-05	7.39817e-05
DPF2	47514	101	0.137365	0.0693681	-0.0679973	3.64775e-16	4.94472e-15
ZNF143	51911	118	0.150077	0.081044	-0.0690334	2.39224e-15	2.43211e-14
IKZF2	41475	105	0.119906	0.0721154	-0.0477909	3.0249e-09	1.23013e-08
STAT1	18198	41	0.0526113	0.0281593	-0.024452	7.11491e-06	1.60744e-05
USF2	11447	29	0.0330939	0.0199176	-0.0131763	0.00401348	0.00556414
NFATC3	23483	50	0.0678905	0.0343407	-0.0335499	3.50693e-08	1.22242e-07
BHLHE40	51999	116	0.150332	0.0796703	-0.0706614	5.31972e-16	5.90005e-15
TRIM22	40690	95	0.117637	0.0652473	-0.0523896	3.11559e-11	1.46193e-10
YY1	61146	138	0.176776	0.0947802	-0.081996	1.72105e-18	5.24921e-17
ATF2	25517	59	0.0737709	0.040522	-0.033249	1.98597e-07	5.90946e-07
SIX5	16033	43	0.0463522	0.029533	-0.0168192	0.00171592	0.00249217
SKIL	18100	41	0.052328	0.0281593	-0.0241687	8.87533e-06	1.93355e-05
RELB	38481	83	0.111251	0.0570055	-0.054245	1.18014e-12	7.57772e-12
ATF7	33144	82	0.095821	0.0563187	-0.0395023	5.80846e-08	1.91522e-07
HCFC1	29618	59	0.0856271	0.040522	-0.0451052	1.87436e-11	9.14685e-11
TAF1	55523	108	0.16052	0.0741758	-0.086344	1.25056e-22	7.62844e-21
SMAD5	29871	56	0.0863586	0.0384615	-0.047897	7.73795e-13	5.24461e-12
ZNF687	35761	76	0.103387	0.0521978	-0.0511891	3.67124e-12	2.03587e-11
MAFK	3137	9	0.00906923	0.00618132	-0.00288791	0.328914	0.368142
MLLT1	36927	91	0.106758	0.0625	-0.0442578	6.2028e-09	2.29316e-08
IKZF1	76166	194	0.2202	0.133242	-0.086958	3.89706e-17	6.79202e-16
ZBTB40	32774	76	0.0947513	0.0521978	-0.0425535	2.69295e-09	1.1329e-08
ELF1	49986	122	0.144512	0.0837912	-0.0607209	2.22908e-12	1.35974e-11
ZNF592	10612	26	0.0306798	0.0178571	-0.0128227	0.00290259	0.00411763
IRF3	12819	25	0.0370604	0.0171703	-0.01989	1.40701e-05	2.90941e-05
SMAD1	12855	16	0.0371645	0.010989	-0.0261754	1.45506e-09	6.33992e-09
SRF	19646	48	0.0567976	0.032967	-0.0238306	3.18761e-05	6.17284e-05
NBN	45364	103	0.13115	0.0707418	-0.0604079	2.43764e-13	1.98261e-12
NFYB	16715	39	0.0483239	0.0267857	-0.0215382	4.85163e-05	8.96817e-05
E4F1	20860	33	0.0603073	0.0226648	-0.0376425	1.50339e-11	7.64222e-11
TBX21	19327	39	0.0558753	0.0267857	-0.0290896	1.59907e-07	4.87716e-07
KLF5	24492	38	0.0708076	0.0260989	-0.0447087	6.40213e-14	5.579e-13
RB1	34981	71	0.101132	0.0487637	-0.0523681	4.57213e-13	3.28117e-12
GATAD2B	47790	102	0.138163	0.0700549	-0.0681084	4.28368e-16	5.22609e-15
MEF2B	29099	71	0.0841267	0.0487637	-0.0353629	2.23275e-07	5.97582e-07
GABPA	15488	41	0.0447766	0.0281593	-0.0166173	0.00144457	0.00212334
ARNT	21020	46	0.0607699	0.0315934	-0.0291765	4.93904e-07	1.22972e-06
RUNX3	34185	96	0.0988306	0.0659341	-0.0328965	1.23949e-05	2.6072e-05
MTA2	22667	50	0.0655314	0.0343407	-0.0311908	2.25318e-07	5.97582e-07
BACH1	27858	61	0.0805389	0.0418956	-0.0386433	5.59904e-09	2.20349e-08
ZSCAN29	9559	20	0.0276356	0.0137363	-0.0138993	0.000535747	0.000806927
CTCF	54659	127	0.158022	0.0872253	-0.0707967	2.77811e-15	2.60715e-14
TCF12	35836	73	0.103604	0.0501374	-0.0534663	3.00711e-13	2.29292e-12
ZNF217	16260	40	0.0470085	0.0274725	-0.019536	0.000234425	0.000371426
ZNF207	28314	54	0.0818572	0.0370879	-0.0447693	7.14614e-12	3.79056e-11
MAX	46963	98	0.135772	0.0673077	-0.0684647	1.35224e-16	2.06217e-15
PAX5	18804	38	0.0543633	0.0260989	-0.0282644	2.14753e-07	5.97582e-07
BCL3	12331	35	0.0356495	0.0240385	-0.0116111	0.0157015	0.0199539
ELK1	19941	44	0.0576504	0.0302198	-0.0274307	1.45415e-06	3.54813e-06
CUX1	3617	5	0.0104569	0.00343407	-0.00702286	0.00420848	0.00576893
ETS1	30029	68	0.0868154	0.0467033	-0.0401121	5.93569e-09	2.26298e-08
FOXK2	11311	23	0.0327007	0.0157967	-0.016904	0.000109748	0.000180936
CBFB	27385	50	0.0791714	0.0343407	-0.0448308	2.36386e-12	1.37329e-11
JUND	9989	19	0.0288787	0.0130495	-0.0158293	0.00010704	0.000178888
EED	24685	61	0.0713656	0.0418956	-0.02947	3.97351e-06	9.50526e-06
E2F4	10288	22	0.0297431	0.0151099	-0.0146332	0.000467587	0.00071307
PBX3	9545	18	0.0275951	0.0123626	-0.0152324	0.000144699	0.000235376
EBF1	10135	38	0.0293008	0.0260989	-0.0032019	0.532865	0.578651
NFXL1	2534	8	0.00732592	0.00549451	-0.00183142	0.535964	0.578651
JUNB	6012	22	0.017381	0.0151099	-0.00227111	0.614334	0.651728
CEBPB	2618	6	0.00756877	0.00412088	-0.00344789	0.168745	0.194216
BATF	5775	21	0.0166958	0.0144231	-0.00227274	0.607227	0.64984
CHD1	15661	36	0.0452767	0.0247253	-0.0205515	6.31247e-05	0.000111612
ZBTB33	15906	33	0.0459851	0.0226648	-0.0233202	4.16424e-06	9.76995e-06
MEF2C	6646	14	0.0192139	0.00961538	-0.00959854	0.00524902	0.00711534
NRF1	27296	65	0.0789141	0.0446429	-0.0342713	2.15001e-07	5.97582e-07
TBP	36360	92	0.105119	0.0631868	-0.0419318	3.66704e-08	1.24272e-07
TBL1XR1	20140	50	0.0582258	0.0343407	-0.0238851	3.94165e-05	7.39817e-05
ETV6	14021	41	0.0405354	0.0281593	-0.0123761	0.0161856	0.0203572
NFIC	24583	69	0.0710707	0.0473901	-0.0236806	0.000272498	0.00042082
IRF4	11705	30	0.0338397	0.0206044	-0.0132354	0.00358279	0.00502415
MEF2A	10735	29	0.0310354	0.0199176	-0.0111178	0.0122062	0.015842
BCL11A	5807	7	0.0167883	0.00480769	-0.0119806	5.61972e-05	0.000102329
RCOR1	16852	36	0.04872	0.0247253	-0.0239947	4.26134e-06	9.80912e-06
MTA3	21399	47	0.0618656	0.0322802	-0.0295854	4.56193e-07	1.15949e-06
STAT5A	13662	28	0.0394975	0.0192308	-0.0202668	1.90153e-05	3.74173e-05
NFATC1	11774	22	0.0340392	0.0151099	-0.0189293	1.64034e-05	3.28069e-05
EGR1	10853	19	0.0313766	0.0130495	-0.0183271	1.0599e-05	2.26856e-05
RXRA	3570	11	0.0103211	0.00755495	-0.00276611	0.361854	0.401329
REST	12726	27	0.0367915	0.018544	-0.0182476	8.38429e-05	0.000146126
IRF5	3307	7	0.0095607	0.00480769	-0.00475301	0.0764276	0.0941835
HSF1	4603	9	0.0133075	0.00618132	-0.00712619	0.0151896	0.0195067
NR2C2	1756	0	0.00507669	0	-0.00507669	0.00121281	0.00180442
UBTF	3177	7	0.00918487	0.00480769	-0.00437718	0.0956697	0.115561
RBBP5	4831	14	0.0139667	0.00961538	-0.00435128	0.178456	0.203473
WRNIP1	8975	16	0.0259472	0.010989	-0.0149582	9.13551e-05	0.000156976
MYB	4412	8	0.0127553	0.00549451	-0.00726081	0.00951013	0.0126113
ZBED1	11605	25	0.0335506	0.0171703	-0.0163803	0.000241829	0.000378246
NFYA	3682	6	0.0106448	0.00412088	-0.00652397	0.010007	0.0131275
ESRRA	10193	13	0.0294685	0.00892857	-0.0205399	1.37063e-07	4.28762e-07
RAD51	12525	42	0.0362104	0.0288462	-0.00736426	0.139762	0.165544
TCF7	3980	15	0.0115064	0.0103022	-0.00120418	0.804861	0.839257
ZNF384	6213	12	0.0179621	0.00824176	-0.00972034	0.00286896	0.00411763
CHD4	902	3	0.00260773	0.00206044	-0.000547288	1	1
PAX8	2813	7	0.00813253	0.00480769	-0.00332483	0.186769	0.21098
STAT3	4394	11	0.0127033	0.00755495	-0.00514833	0.0982644	0.117532
NFE2	501	6	0.00144842	0.00412088	0.00267246	0.0211681	0.0263522
ZZZ3	712	2	0.00205843	0.00137363	-0.000684802	1	1
SUPT20H	87	0	0.000251521	0	-0.000251521	1	1

## Sheet: Table S7
Table S7 - Analysis of TF binding sites associated with slope QTL SNPs
Table of TF binding site counts at slope QTL SNPs
TF binding sites were taken from ENCODE GM12878 hg38 data from the TF clusters annotation
The folowing proteins were removed from the analysis as they are general chromatin factors rather than site specific TFs:
POLR2A, ARID3A, RAD21, EZH2, SUZ12, HDAC6, SIN3A, HDAC2, BMI1, CBX3, KDM1A, ASH2L, SMC3, CBX5, CBX3, MLLT1, KAT2A
The background was all SNPs present on the array that were included in the analysis to find slope QTLs
P-value from Fisher's exact tests and adjusted p-value is Benjami Hochberg adjusted p-value
	Counts		Percentage
TF	Background	Slope QTLs	Background	Slope QTLs	% Difference	P-value	Adjusted P-value
CTCF	6442	62	0.0211773	0.0443808	0.0232035	1.2175e-07	4.91057e-06
TAF1	972	17	0.00319533	0.0121689	0.0089736	4.9239e-06	0.000148948
MAX	961	16	0.00315917	0.0114531	0.00829395	1.66253e-05	0.000402332
TBP	1048	16	0.00344517	0.0114531	0.00800794	4.56481e-05	0.00092057
ZNF207	649	12	0.00213351	0.00858984	0.00645633	7.0245e-05	0.00106246
NRF1	283	8	0.000930327	0.00572656	0.00479623	6.9381e-05	0.00106246
ZNF143	2254	25	0.00740975	0.0178955	0.0104857	0.000106267	0.00128583
SMAD1	571	11	0.00187709	0.00787402	0.00599692	9.79066e-05	0.00128583
KLF5	514	10	0.00168971	0.0071582	0.00546848	0.000185357	0.00186902
ELF1	1633	19	0.00536828	0.0136006	0.00823229	0.000302862	0.00281894
BACH1	800	12	0.0026299	0.00858984	0.00595993	0.000454564	0.00392874
MXI1	1205	15	0.00396129	0.0107373	0.00677601	0.000644547	0.00519935
RCOR1	619	10	0.00203489	0.0071582	0.00512331	0.000763881	0.00577685
BCL3	915	12	0.00300795	0.00858984	0.00558189	0.00140638	0.00945398
NFYB	485	8	0.00159438	0.00572656	0.00413218	0.00220074	0.0140152
PKNOX1	1841	18	0.00605206	0.0128848	0.00683269	0.00303079	0.0174631
ZBTB40	1007	12	0.00331039	0.00858984	0.00527945	0.00302941	0.0174631
E2F4	135	4	0.000443796	0.00286328	0.00241948	0.00397503	0.0209121
HCFC1	337	6	0.00110785	0.00429492	0.00318707	0.00533513	0.0268979
ZBTB33	460	7	0.00151219	0.00501074	0.00349854	0.00620552	0.0300347
CREM	1528	15	0.00502311	0.0107373	0.00571418	0.00669719	0.0311677
TRIM22	2553	22	0.00839267	0.015748	0.00735536	0.00724585	0.0324722
CBFB	1141	12	0.0037509	0.00858984	0.00483894	0.00781065	0.0337532
ETS1	492	7	0.00161739	0.00501074	0.00339335	0.00875013	0.0365092
ZSCAN29	273	5	0.000897454	0.0035791	0.00268164	0.00951931	0.0383945
ARNT	1271	13	0.00417825	0.00930565	0.0051274	0.00994212	0.0388063
E4F1	281	5	0.000923753	0.0035791	0.00265535	0.0106628	0.0403189
SIX5	185	4	0.000608165	0.00286328	0.00225511	0.0115041	0.0421817
YY1	2071	18	0.00680816	0.0128848	0.0060766	0.012851	0.0457344
RUNX3	3033	24	0.00997061	0.0171797	0.00720906	0.0140544	0.0485881
DPF2	2461	20	0.00809023	0.0143164	0.00622616	0.0156685	0.0526634
IKZF2	3960	29	0.013018	0.0207588	0.00774076	0.0172002	0.0562493
STAT5A	716	8	0.00235376	0.00572656	0.0033728	0.0196802	0.0626658
GATAD2B	1598	14	0.00525323	0.0100215	0.00476825	0.0235385	0.0730298
STAT1	349	5	0.00114729	0.0035791	0.0024318	0.0243188	0.0731557
MLLT1	2205	18	0.00724866	0.0128848	0.00563609	0.0247883	0.0731557
RB1	771	8	0.00253457	0.00572656	0.00319199	0.0286696	0.0825959
SMARCA5	1017	10	0.00334326	0.0071582	0.00381493	0.0305606	0.0859961
EBF1	1776	15	0.00583838	0.0107373	0.00489891	0.0316524	0.087044
NBN	2158	17	0.00709416	0.0121689	0.00507478	0.0355456	0.0935003
MTA3	1346	12	0.00442481	0.00858984	0.00416503	0.0388447	0.100004
USF2	297	4	0.000976351	0.00286328	0.00188693	0.0505613	0.124855
SMAD5	579	6	0.00190339	0.00429492	0.00239153	0.0540964	0.130913
ZNF687	1585	13	0.00521049	0.00930565	0.00409516	0.0582559	0.135557
CHD1	446	5	0.00146617	0.0035791	0.00211293	0.0578323	0.135557
E2F8	332	4	0.00109141	0.00286328	0.00177187	0.0697025	0.158161
TCF12	1386	11	0.0045563	0.00787402	0.00331771	0.072005	0.158411
CEBPB	116	2	0.000381336	0.00143164	0.0010503	0.102028	0.220453
BHLHE40	2340	16	0.00769246	0.0114531	0.00376065	0.121695	0.253349
RFX5	263	3	0.00086458	0.00214746	0.00128288	0.123534	0.253349
BATF	1200	9	0.00394485	0.00644238	0.00249753	0.132575	0.26736
IKZF1	5732	34	0.0188432	0.0243379	0.00549463	0.138128	0.267736
RELB	2563	17	0.00842554	0.0121689	0.00374339	0.1394	0.267736
ATF7	2511	17	0.0082546	0.0121689	0.00391433	0.134993	0.267736
UBTF	33	1	0.000108483	0.00071582	0.000607336	0.144265	0.268579
RAD51	1021	8	0.00335641	0.00572656	0.00237015	0.154547	0.283336
BRCA1	40	1	0.000131495	0.00071582	0.000584325	0.171279	0.304777
SKIL	1582	11	0.00520063	0.00787402	0.00267339	0.185965	0.326112
ZBED1	923	7	0.00303425	0.00501074	0.00197649	0.211753	0.360875
JUND	342	3	0.00112428	0.00214746	0.00102318	0.210444	0.360875
NFIC	2405	15	0.00790614	0.0107373	0.00283116	0.224014	0.376467
IRF4	1013	7	0.00333011	0.00501074	0.00168063	0.242469	0.391557
MTA2	2583	16	0.00849129	0.0114531	0.00296182	0.239034	0.391557
STAT3	369	3	0.00121304	0.00214746	0.000934417	0.242701	0.391557
JUNB	1708	11	0.00561484	0.00787402	0.00225918	0.276084	0.430314
MEF2C	440	0	0.00144645	0	-0.00144645	0.277392	0.430314
RXRA	78	1	0.000256415	0.00071582	0.000459404	0.303732	0.46521
ZNF592	517	4	0.00169957	0.00286328	0.00116371	0.308762	0.467003
SRF	940	6	0.00309013	0.00429492	0.00120478	0.336763	0.503066
RBBP5	93	1	0.000305726	0.00071582	0.000410094	0.349991	0.51645
ETV6	1326	8	0.00435906	0.00572656	0.0013675	0.410565	0.591409
ATF2	2748	15	0.00903371	0.0107373	0.00170359	0.476633	0.65537
REST	442	3	0.00145302	0.00214746	0.000694439	0.462604	0.65537
WRNIP1	462	3	0.00151877	0.00214746	0.000628691	0.475987	0.65537
GABPA	452	3	0.00148589	0.00214746	0.000661565	0.469176	0.65537
NFATC1	1041	6	0.00342216	0.00429492	0.000872759	0.489229	0.661067
TCF7	484	3	0.00159109	0.00214746	0.000556369	0.491703	0.661067
ZNF384	514	3	0.00168971	0.00214746	0.000457748	0.514411	0.683493
MYB	159	1	0.000522693	0.00071582	0.000193127	0.51968	0.683493
MEF2B	2400	13	0.0078897	0.00930565	0.00141595	0.541605	0.704669
PAX8	190	1	0.000624601	0.00071582	9.12182e-05	0.583315	0.750863
BCL11A	769	2	0.00252799	0.00143164	-0.00109635	0.594216	0.756843
PBX3	355	2	0.00116702	0.00143164	0.000264621	0.680547	0.857772
CUX1	426	2	0.00140042	0.00143164	3.12171e-05	0.723421	0.902412
PAX5	964	3	0.00316903	0.00214746	-0.00102157	0.807989	0.987542
TBX21	2245	9	0.00738016	0.00644238	-0.000937782	0.874736	1
ELK1	282	1	0.00092704	0.00071582	-0.00021122	1	1
MAFK	331	1	0.00108812	0.00071582	-0.000372302	1	1
NFATC3	1495	6	0.00491463	0.00429492	-0.000619709	1	1
TBL1XR1	843	3	0.00277126	0.00214746	-0.000623799	1	1
MEF2A	853	3	0.00280413	0.00214746	-0.000656673	1	1
ZNF217	1000	4	0.00328738	0.00286328	-0.000424097	1	1
HSF1	117	0	0.000384623	0	-0.000384623	1	1
CHD4	60	0	0.000197243	0	-0.000197243	1	1
ESRRA	214	0	0.000703498	0	-0.000703498	1	1
FOXK2	237	1	0.000779108	0.00071582	-6.32885e-05	1	1
IRF3	155	0	0.000509543	0	-0.000509543	1	1
EGR1	97	0	0.000318875	0	-0.000318875	1	1
NR2C2	39	0	0.000128208	0	-0.000128208	1	1
NFXL1	170	0	0.000558854	0	-0.000558854	1	1
NFYA	33	0	0.000108483	0	-0.000108483	1	1
IRF5	82	0	0.000269565	0	-0.000269565	1	1
ZZZ3	24	0	7.8897e-05	0	-7.8897e-05	1	1
NFE2	5	0	1.64369e-05	0	-1.64369e-05	1	1
